# Supplementary material
Source: publisher figshare collection journal article supplement (https://frontiersin.figshare.com/ndownloader/files/21619623)
Supplement: Supplementary file 1 [file 21619623]

## Sheet: CPX_ME_Table1
Table 1: Clinopyroxene major element compostions
Position [1=core]	Eruption period	Comment	SiO2 (wt.%)	TiO2 (wt.%)	Al2O3 (wt.%)	FeO (wt.%)	MnO (wt.%)	MgO (wt.%)	CaO (wt.%)	Na2O (wt.%)	Cr2O3 (wt.%)	NiO (wt.%)	Total (wt.%)
1	2014-10-01	AH_29_cpx1_1	51.25	0.9209	3.59	8.19	0.215	15.91	18.07	0.2431	0.1974	0.0208	98.6072
2	2014-10-01	AH_29_cpx1_2	50.28	1.2492	4.26	8.37	0.2034	15.02	18.57	0.2592	0.1484	0.0222	98.3824
3	2014-10-01	AH_29_cpx1_3	51.9	0.7724	3.38	7.41	0.1803	16.1	18.53	0.2414	0.292	0.0392	98.8453
4	2014-10-01	AH_29_cpx1_4	50.87	1.0187	4.1	7.88	0.1901	15.33	18.91	0.2408	0.1948	0.0263	98.7607
5	2014-10-01	AH_29_cpx1_5	51.37	0.8965	3.68	7.45	0.2179	15.7	18.91	0.2593	0.2245	0.0298	98.738
6	2014-10-01	AH_29_cpx1_6	50.43	1.1128	4.3	8.18	0.2219	15.32	18.63	0.252	0.0831	0.0063	98.5361
7	2014-10-01	AH_29_cpx1_7	51.08	1.0846	4.12	8.11	0.1975	15.22	18.78	0.2292	0.1511	0.0073	98.9797
8	2014-10-01	AH_29_cpx1_8	51.36	0.8231	3.98	7.77	0.1918	15.65	18.48	0.2797	0.104	0.0178	98.6564
9	2014-10-01	AH_29_cpx1_9	51.76	0.6844	3.48	7	0.1672	16.07	19.11	0.265	0.271	0.0255	98.8331
10	2014-10-01	AH_29_cpx1_10	51.31	0.7489	3.85	7.05	0.1696	15.75	19.06	0.2631	0.2215	0.0303	98.4534
11	2014-10-01	AH_29_cpx1_11	51.42	0.74	3.79	7.01	0.1811	15.64	19.38	0.2433	0.2168	0.0294	98.6506
12	2014-10-01	AH_29_cpx1_12	51.82	0.6702	2.9	6.98	0.1807	15.98	19.79	0.2409	0.1737	0.0267	98.7622
13	2014-10-01	AH_29_cpx1_13	52.02	0.6595	2.92	7.11	0.1912	15.78	19.7	0.2393	0.1373	0.0222	98.7795
14	2014-10-01	AH_29_cpx1_14	51.96	0.6843	2.96	7.44	0.1829	15.74	19.83	0.2428	0.094	0.032	99.166
15	2014-10-01	AH_29_cpx1_15	51.67	0.7084	3.2	7.24	0.1751	15.58	19.63	0.2378	0.0913	0.0123	98.5449
1	2014-10-01	AH_29_cpx2_1	51.64	0.4166	1.6564	7.75	0.2183	17.99	16.67	0.1754	0.1629	0.0276	96.7072
2	2014-10-01	AH_29_cpx2_2	51.27	0.7381	3.7	7.24	0.194	15.67	19.23	0.2205	0.2916	0.0289	98.5831
3	2014-10-01	AH_29_cpx2_3	51.4	0.7484	3.72	7.6	0.1772	15.73	19.14	0.2639	0.1665	0.0095	98.9555
4	2014-10-01	AH_29_cpx2_4	51.04	0.7117	3.9	7.05	0.164	15.5	19.45	0.2586	0.224	0.0298	98.3281
5	2014-10-01	AH_29_cpx2_5	51.11	0.8119	3.8	7.71	0.1855	15.43	19.32	0.2496	0.1205	0.0164	98.7539
6	2014-10-01	AH_29_cpx2_6	51.29	0.7453	3.24	7.25	0.1899	15.52	19.99	0.2519	0.1596	0.0176	98.6543
7	2014-10-01	AH_29_cpx2_7	51.52	0.6666	2.92	7.71	0.2029	16.07	18.78	0.2492	0.1183	0.0184	98.2554
8	2014-10-01	AH_29_cpx2_8	52.1	0.6465	2.67	6.88	0.1645	15.68	20.33	0.2202	0.1206	0.0095	98.8213
9	2014-10-01	AH_29_cpx2_9	51.98	0.5934	2.45	7.1	0.1725	15.95	19.92	0.2435	0.1097	0.0264	98.5455
10	2014-10-01	AH_29_cpx2_10	51.7	0.7031	2.82	7.2	0.1889	15.55	20.18	0.2235	0.0968	0.0265	98.6888
1	2014-10-01	AH_29_cpx3_1	52.51	0.5367	2.53	7.36	0.1989	17.19	18.1	0.2075	0.2189	0.0167	98.8687
2	2014-10-01	AH_29_cpx3_2	52.6	0.527	2.5	7.91	0.2224	17.23	17.62	0.2091	0.1583	0.0133	98.9901
3	2014-10-01	AH_29_cpx3_3	51.14	0.776	3.88	7.93	0.1902	16.21	17.97	0.2272	0.2214	0.0111	98.5559
4	2014-10-01	AH_29_cpx3_4	51.24	0.7333	3.69	7.35	0.1889	15.6	19.34	0.2783	0.1953	0.0052	98.621
5	2014-10-01	AH_29_cpx3_5	50.51	0.8578	4.17	8.31	0.2104	15.4	18.7	0.2868	0.0791	0.018	98.5421
6	2014-10-01	AH_29_cpx3_6	52.08	0.5653	2.48	6.93	0.1526	16.26	19.71	0.241	0.1221	0.0178	98.5588
7	2014-10-01	AH_29_cpx3_7	51.18	0.8863	3.43	8.03	0.2051	15.2	19.43	0.2678	0.0359	0.0135	98.6786
8	2014-10-01	AH_29_cpx3_8	52.06	0.661	2.76	6.89	0.1782	15.88	19.99	0.2281	0.1267	0.0223	98.7963
9	2014-10-01	AH_29_cpx3_9	52.05	0.6464	2.8	7.13	0.1928	15.93	19.94	0.2429	0.1168	0.0039	99.0528
1	2014-10-01	HB_9_cpx2_1	53.84	0.4142	1.5658	9.2	0.2767	19.23	14.47	0.1617	0.0632	0.0255	99.2471
2	2014-10-01	HB_9_cpx2_2	53.62	0.4359	1.8026	8.79	0.2836	18.41	15.59	0.1949	0.0657	0.032	99.2247
3	2014-10-01	HB_9_cpx2_3	50.78	1.0199	3.79	7.96	0.1984	15.25	19.4	0.2395	0.1045	0.0033	98.7456
4	2014-10-01	HB_9_cpx2_4	51.22	0.9537	3.73	7.63	0.1878	15.21	19.74	0.241	0.1113	0.0259	99.0497
5	2014-10-01	HB_9_cpx2_5	52.07	0.716	3.04	7.65	0.1814	15.37	19.85	0.2492	0.1731	0.0261	99.3258
6	2014-10-01	HB_9_cpx2_6	51.65	0.7894	2.89	8.91	0.2199	14.9	19.45	0.2142	0.0929	0.0373	99.1537
7	2014-10-01	HB_9_cpx2_7	51.87	0.809	2.23	9.95	0.2655	14.93	18.61	0.2065	0.0134	0.0325	98.9169
8	2014-10-01	HB_9_cpx2_8	52.23	0.7301	2.12	8.82	0.2137	15.63	18.89	0.214	0.0534	0.0095	98.9107
1	2014-10-01	HB_9_cpx3_1	52.88	0.4015	1.6792	7.69	0.2221	18.36	16.3	0.1827	0.1461	0.0334	97.895
2	2014-10-01	HB_9_cpx3_2	51.13	0.7762	3.57	7.21	0.1893	16.06	19	0.2328	0.2477	0.0255	98.4415
3	2014-10-01	HB_9_cpx3_3	51.4	0.6077	2.88	6.72	0.1845	16.03	19.5	0.2244	0.2106	0.0269	97.7841
4	2014-10-01	HB_9_cpx3_4	50.65	0.8915	3.6	7.92	0.2107	15.57	18.68	0.2535	0.1043	0.0298	97.9098
5	2014-10-01	HB_9_cpx3_5	51.66	0.6467	2.78	7.1	0.1751	16	19.22	0.2166	0.1348	0.0406	97.9738
6	2014-10-01	HB_9_cpx3_6	52.03	0.6842	2.04	8.7	0.2106	15.53	18.93	0.2436	0.0615	0.0277	98.4576
1	2014-10-01	HB_9_cpx4_1	53.24	0.4371	2.12	7.66	0.2	17.59	17.4	0.2143	0.1282	0.0157	99.0053
2	2014-10-01	HB_9_cpx4_2	52.8	0.4482	2.02	7.75	0.2356	17.6	17.31	0.1737	0.0981	0.0311	98.4667
3	2014-10-01	HB_9_cpx4_3	51.13	0.8756	3.73	7.83	0.1908	15.89	18.71	0.2558	0.1703	0.0254	98.8079
4	2014-10-01	HB_9_cpx4_4	50.31	0.9382	3.93	7.69	0.1845	15.31	19.17	0.2474	0.1075	0.0078	97.8954
5	2014-10-01	HB_9_cpx4_5	50.36	0.9504	3.98	7.81	0.2024	15.33	19.07	0.254	0.0907	0.015	98.0625
6	2014-10-01	HB_9_cpx4_6	50.45	0.9593	4	7.83	0.1943	15.37	19.23	0.2583	0.1136	0.0167	98.4222
7	2014-10-01	HB_9_cpx4_7	50.66	0.8865	3.66	7.63	0.1928	15.49	19.49	0.2598	0.1175	0.0149	98.4015
8	2014-10-01	HB_9_cpx4_8	51.5	0.771	3.38	7.36	0.1865	15.64	19.54	0.2195	0.1474	0.0086	98.753
9	2014-10-01	HB_9_cpx4_9	52.02	0.6934	2.06	8.5	0.2156	15.38	19.51	0.2061	0.0724	0.0373	98.6948
10	2014-10-01	HB_9_cpx4_10	52.92	0.4282	2.01	7.96	0.2205	18.49	15.95	0.1606	0.1661	0.0202	98.3256
1	2014-10-01	HB9_cpx5_1	53	0.4257	1.96	7.78	0.2469	18.42	16.13	0.1761	0.1528	0.0167	98.3082
2	2014-10-01	HB9_cpx5_2	50.99	0.9463	4.16	7.5	0.2011	15.79	18.59	0.2398	0.18	0.006	98.6032
3	2014-10-01	HB9_cpx5_3	50.96	0.8164	3.85	7.34	0.1827	15.66	19.15	0.2125	0.1121	0.011	98.2947
4	2014-10-01	HB9_cpx5_4	50.49	0.9371	4.05	7.53	0.1688	15.53	19.18	0.2473	0.1449	0.0313	98.3094
5	2014-10-01	HB9_cpx5_5	50.86	0.8548	3.74	7.35	0.1747	15.68	19.01	0.2516	0.1255	0.0235	98.0701
6	2014-10-01	HB9_cpx5_6	50.8	0.7859	3.63	7.17	0.2022	15.74	19.09	0.2465	0.1542	0.0097	97.8285
7	2014-10-01	HB9_cpx5_7	50.87	0.7656	3.65	6.87	0.1838	15.85	19.26	0.2189	0.2515	0.0333	97.9531
8	2014-10-01	HB9_cpx5_8	51.02	0.7821	3.69	7	0.1709	15.85	19.11	0.2681	0.2071	0.0116	98.1098
9	2014-10-01	HB9_cpx5_9	51.35	0.7739	3.28	7.21	0.2175	15.73	19.22	0.209	0.1396	0.0176	98.1476
10	2014-10-01	HB9_cpx5_10	51.45	0.6985	3.16	7.03	0.1729	15.78	19.6	0.2231	0.1423	0.0229	98.2797
11	2014-10-01	HB9_cpx5_11	51.52	0.7081	3.11	7.24	0.1932	15.75	19.5	0.2355	0.1027	0.011	98.3705
12	2014-10-01	HB9_cpx5_12	50.8	0.9915	2.53	11.35	0.2755	14.53	17.52	0.2699	0.0185	0.0263	98.3117
1	2014-10-01	HB9_cpx6_1	53.32	0.4189	1.613	8.53	0.2728	18.39	15.8	0.166	0.049	0.0208	98.5805
2	2014-10-01	HB9_cpx6_2	50.6	0.9177	3.99	7.56	0.168	14.83	19.99	0.242	0.13	0.0082	98.4359
3	2014-10-01	HB9_cpx6_3	51.41	0.775	3.46	7.31	0.1879	15.78	19.38	0.2497	0.1704	0.0298	98.7528
4	2014-10-01	HB9_cpx6_4	51.23	0.7935	3.4	7.31	0.1895	15.81	19.35	0.2231	0.1604	0.005	98.4715
5	2014-10-01	HB9_cpx6_5	51.09	0.9724	3.8	7.67	0.1971	15.47	19.26	0.2366	0.1127	0.0231	98.8319
6	2014-10-01	HB9_cpx6_6	51.1	1.0186	3.86	7.76	0.1785	15.37	19.23	0.2488	0.0912	0.0265	98.8836
7	2014-10-01	HB9_cpx6_7	51.24	0.9485	3.79	7.75	0.1909	15.33	19.27	0.2526	0.1092	0.0047	98.8859
8	2014-10-01	HB9_cpx6_8	51.03	0.9654	3.56	7.89	0.1969	15.35	19.42	0.2402	0.0751	0.0312	98.7588
9	2014-10-01	HB9_cpx6_9	51.53	0.7346	3.22	7.1	0.1861	15.71	19.61	0.2519	0.1446	0.0324	98.5196
10	2014-10-01	HB9_cpx6_10	51.57	0.7741	2.55	8.58	0.2261	15.49	18.95	0.2418	0.0552	0.0092	98.4464
1	2014-10-01	HB9_cpx7_1	52.03	0.556	2.73	6.79	0.1806	16.52	18.93	0.1957	0.2308	0.0042	98.1673
2	2014-10-01	HB9_cpx7_2	52.26	0.5416	2.63	6.75	0.1643	16.47	19.39	0.2114	0.1971	0.0238	98.6382
3	2014-10-01	HB9_cpx7_3	51.58	0.71	3.24	7.03	0.1947	16.01	19.31	0.2486	0.236	0.0153	98.5746
4	2014-10-01	HB9_cpx7_4	50.9	0.8812	3.76	7.53	0.181	15.86	19.01	0.2444	0.1971	0.025	98.5887
5	2014-10-01	HB9_cpx7_5	51.86	0.6426	3.04	6.71	0.196	15.97	19.75	0.237	0.2201	0.0314	98.6571
6	2014-10-01	HB9_cpx7_6	51.62	0.6599	3.15	6.91	0.173	15.98	19.75	0.225	0.2011	0.0092	98.6782
7	2014-10-01	HB9_cpx7_7	51.1	0.9581	3.16	8.75	0.2156	15.22	18.57	0.2108	0.0703	0.0209	98.2757
8	2014-10-01	HB9_cpx7_8	52.22	0.6966	2.03	8.52	0.2329	15.52	19.12	0.2158	0.0466	0.0149	98.6168
1	2014-10-01	HB9_cpx_8_1	53.44	0.408	1.723	7.6	0.2252	18.23	16.83	0.1729	0.1484	0.021	98.7985
2	2014-10-01	HB9_cpx_8_2	52.5	0.5062	2.34	6.92	0.1674	16.71	19.1	0.2106	0.1844	0.0153	98.6539
3	2014-10-01	HB9_cpx_8_3	51.29	0.7594	3.28	7.02	0.1784	15.52	19.99	0.2418	0.197	0.0027	98.4793
4	2014-10-01	HB9_cpx_8_4	50.78	0.9134	3.95	7.79	0.1989	14.99	19.72	0.2439	0.1278	0.0432	98.7572
5	2014-10-01	HB9_cpx_8_5	51.63	0.7698	3.31	7.13	0.163	15.51	20.13	0.2478	0.1611	0.0044	99.0561
6	2014-10-01	HB9_cpx_8_6	49.68	1.4606	3.92	11.6	0.245	12.97	18.53	0.3085	0	0	98.7141
7	2014-10-01	HB9_cpx_8_7	52.42	0.7462	2.29	8.43	0.2188	15.45	19.36	0.2097	0.0175	0.0257	99.1679
1	2014-12-01	HB7_cpx9_1	51.86	0.7252	3.85	7.09	0.1879	15.9	18.81	0.2252	0.2382	0.0465	98.933
2	2014-12-01	HB7_cpx9_2	51.64	0.8114	4.04	7.06	0.1974	15.85	18.85	0.2713	0.3095	0.0119	99.0415
3	2014-12-01	HB7_cpx9_3	51.73	0.7708	3.98	7.09	0.185	15.84	19	0.27	0.3057	0	99.1715
4	2014-12-01	HB7_cpx9_4	52.27	0.6433	3.28	6.76	0.1663	16.07	19.28	0.2551	0.3076	0.0101	99.0424
5	2014-12-01	HB7_cpx9_5	52.39	0.6016	3.03	6.87	0.1788	16.21	19.63	0.2383	0.216	0.0095	99.3742
6	2014-12-01	HB7_cpx9_6	52.66	0.643	2.68	7.39	0.1937	15.88	19.33	0.207	0.1158	0.0224	99.1219
7	2014-12-01	HB7_cpx9_7	52.64	0.7189	2.35	8.82	0.2185	15.27	18.9	0.2235	0.0374	0.0095	99.1878
1	2014-12-01	HB7_cpx2_1	51.16	0.4255	3.12	4.52	0.1422	16.22	20.58	0.191	1.0177	0.0107	97.3871
2	2014-12-01	HB7_cpx2_2	52.23	0.4896	2.26	6.44	0.1657	16.77	19.08	0.1634	0.2566	0.028	97.8833
3	2014-12-01	HB7_cpx2_3	51.69	0.6408	3.29	6.86	0.1648	16.11	19.1	0.2221	0.1845	0.0302	98.2924
4	2014-12-01	HB7_cpx2_4	53.41	0.4377	1.811	7.64	0.215	17.59	17.46	0.1673	0.1097	0.0268	98.8675
5	2014-12-01	HB7_cpx2_5	53.13	0.4484	1.96	6.73	0.202	16.76	18.93	0.1992	0.1363	0.0282	98.5241
6	2014-12-01	HB7_cpx2_6	52.95	0.5132	1.3825	8.85	0.2354	16.74	17.44	0.1358	0.0486	0.0301	98.3256
1	2014-12-01	HB7_cpx3_1	51.06	0.7295	4.08	7.07	0.1805	15.56	18.87	0.2867	0.347	0.0162	98.1999
2	2014-12-01	HB7_cpx3_2	51.35	0.7271	3.45	6.78	0.1777	15.76	19.23	0.2203	0.3202	0.0112	98.0265
3	2014-12-01	HB7_cpx3_3	51.29	0.6924	3.19	6.61	0.1712	15.7	19.84	0.2272	0.2515	0.0153	97.9876
4	2014-12-01	HB7_cpx3_4	50.47	0.9278	3.76	7.19	0.1556	15.14	19.52	0.2419	0.2006	0.0216	97.6275
5	2014-12-01	HB7_cpx3_5	49.79	1.2015	4.43	7.76	0.1933	14.91	19.26	0.2585	0.1443	0.0051	97.9527
6	2014-12-01	HB7_cpx3_6	51.1	0.8271	3.36	7.08	0.1688	15.47	19.62	0.2284	0.2097	0.0127	98.0767
7	2014-12-01	HB7_cpx3_7	50.82	0.9619	3.73	7.42	0.1732	15.22	19.64	0.2291	0.1425	0.0111	98.3478
8	2014-12-01	HB7_cpx3_8	51.8	0.73	3.21	7.14	0.1661	15.66	19.6	0.2566	0.1609	0.0268	98.7504
9	2014-12-01	HB7_cpx3_9	51.22	0.9687	3.66	7.78	0.2083	15.29	19	0.2657	0.1077	0.0212	98.5216
10	2014-12-01	HB7_cpx3_10	52.05	0.8271	2.54	8.37	0.2154	15.43	18.76	0.2303	0.077	0.0078	98.5076
1	2014-12-01	HB7_cpx4_1	51.18	0.7756	4.06	7.4	0.1734	16.2	18.13	0.2425	0.3403	0.0375	98.5393
2	2014-12-01	HB7_cpx4_2	50.83	0.8599	4.08	6.98	0.1855	15.34	19.6	0.2595	0.2983	0.0109	98.4441
3	2014-12-01	HB7_cpx4_3	51.01	0.7964	3.69	6.75	0.1614	15.53	19.76	0.2136	0.3241	0.0201	98.2556
4	2014-12-01	HB7_cpx4_4	50.66	0.9349	4.01	7.45	0.1908	15.33	19.11	0.2524	0.1792	0.0001	98.1174
5	2014-12-01	HB7_cpx4_5	50.36	0.9786	4.04	7.73	0.1929	15.4	18.92	0.2493	0.1131	0.0033	97.9872
6	2014-12-01	HB7_cpx4_6	51.53	0.6681	3.2	6.77	0.1735	15.92	19.58	0.2265	0.2198	0.0302	98.3181
7	2014-12-01	HB7_cpx4_7	50.76	1.0444	4.12	7.66	0.1949	15.31	19.16	0.2577	0.1382	0.0339	98.6791
8	2014-12-01	HB7_cpx4_8	51.17	0.8584	3.66	7.28	0.2005	15.48	19.38	0.2543	0.1634	0	98.4466
9	2014-12-01	HB7_cpx4_9	52.05	0.6791	3.15	7.02	0.1755	15.75	19.55	0.2268	0.1577	0.0345	98.7936
10	2014-12-01	HB7_cpx4_10	52.85	0.7051	2.12	8.81	0.2038	15.31	18.79	0.1948	0.0328	0.0093	99.0258
11	2014-12-01	HB7_cpx4_11	52.89	0.722	2.05	8.64	0.2167	15.44	19.02	0.2331	0.0545	0.0475	99.3138
1	2014-12-01	HB7_cpx5_1	50.06	0.8538	4.26	7.59	0.2059	16.11	17.69	0.2261	0.4334	0.0254	97.4546
2	2014-12-01	HB7_cpx5_2	50.07	0.9467	4.28	7.17	0.1811	15.47	18.89	0.232	0.3862	0.0147	97.6407
3	2014-12-01	HB7_cpx5_3	50.34	0.8463	3.64	7.1	0.1798	15.75	19.07	0.2521	0.3074	0.0334	97.519
4	2014-12-01	HB7_cpx5_4	51.2	0.6578	2.96	7.18	0.1907	16.15	18.66	0.2301	0.2102	0.0082	97.447
5	2014-12-01	HB7_cpx5_5	50.38	0.8999	4.02	8.52	0.2211	16.04	17.49	0.2348	0.0845	0.0301	97.9204
6	2014-12-01	HB7_cpx5_6	50.45	0.8921	3.72	8.51	0.2269	16.13	17.37	0.2316	0.0891	0.0147	97.6344
7	2014-12-01	HB7_cpx5_7	51.47	0.6525	3.04	7.51	0.1785	15.95	18.82	0.251	0.1339	0.0099	98.0158
8	2014-12-01	HB7_cpx5_8	50.42	1.1577	3.52	11.25	0.2877	15.32	15.95	0.2529	0.0256	0.0115	98.1954
9	2014-12-01	HB7_cpx5_9	51.93	0.6818	2.06	8.7	0.2327	15.38	18.82	0.2105	0.045	0.0338	98.0938
1	2014-12-01	HB7_cpx6_1	50.95	0.807	3.63	8.07	0.2127	15.55	18.73	0.2522	0.0956	0.0164	98.3139
2	2014-12-01	HB7_cpx6_2	51.05	0.7616	3.15	7.76	0.2002	15.54	19.07	0.2306	0.0748	0.0239	97.8611
3	2014-12-01	HB7_cpx6_3	51.11	0.7268	3.07	7.81	0.1977	15.67	19.01	0.2125	0.0801	0.0352	97.9223
4	2014-12-01	HB7_cpx6_4	51	0.6347	2.95	7.07	0.1853	16.06	19.02	0.2266	0.2015	0.0246	97.3727
5	2014-12-01	HB7_cpx6_5	51.22	0.6462	2.98	7.24	0.1864	16.1	18.83	0.2415	0.196	0.027	97.6671
6	2014-12-01	HB7_cpx6_6	51.18	0.7062	3.27	7.13	0.1758	15.72	19.37	0.2447	0.2039	0.0121	98.0127
7	2014-12-01	HB7_cpx6_7	50.69	1.0202	3.35	9.86	0.2708	15.76	16.79	0.1964	0.0442	0.0395	98.0211
8	2014-12-01	HB7_cpx6_8	51.53	0.773	2.69	9.36	0.2342	16.12	17	0.2227	0.0685	0.0135	98.0119
9	2014-12-01	HB7_cpx6_9	51.76	0.7094	2.08	8.93	0.2062	15.45	18.84	0.2212	0.0292	0.0147	98.2407
10	2014-12-01	HB7_cpx6_10	49.34	1.3399	2.8	14.85	0.3699	14.19	14.6	0.2694	0.0053	0.0006	97.7651
1	2014-12-01	HB7_cpx7_1	49.48	0.8249	3.74	6.93	0.1793	15.54	18.86	0.2768	0.4526	0.0205	96.3041
2	2014-12-01	HB7_cpx7_2	50.46	0.8791	4.11	6.98	0.1823	15.51	18.92	0.2518	0.3484	0.014	97.6556
3	2014-12-01	HB7_cpx7_3	51	0.8095	3.5	6.88	0.1794	15.64	19.44	0.2388	0.2136	0.0064	97.9077
4	2014-12-01	HB7_cpx7_4	51.06	0.8294	3.68	6.93	0.1924	15.56	19.54	0.2402	0.1727	0	98.2047
5	2014-12-01	HB7_cpx7_5	50.48	1.0287	4.16	7.5	0.1659	15.25	19.11	0.2434	0.0853	0.0345	98.0578
6	2014-12-01	HB7_cpx7_6	51.38	0.769	3.34	6.93	0.1485	15.84	19.54	0.2586	0.1565	0.0259	98.3885
7	2014-12-01	HB7_cpx7_7	51.43	0.6731	3.18	6.65	0.1775	15.78	19.66	0.2201	0.2478	0.0237	98.0422
8	2014-12-01	HB7_cpx7_8	51.14	0.866	3.65	7.11	0.1974	15.51	19.47	0.2079	0.1208	0.0212	98.2933
9	2014-12-01	HB7_cpx7_9	51.14	0.6757	3.18	6.7	0.1697	15.69	19.72	0.211	0.2223	0.0258	97.7345
10	2014-12-01	HB7_cpx7_10	51.15	0.6728	3.05	6.74	0.1663	15.62	19.81	0.2289	0.1633	0.0226	97.6239
11	2014-12-01	HB7_cpx7_11	49.78	0.9618	3.85	7.7	0.2136	15.19	19.28	0.245	0.0626	0.0212	97.3042
12	2014-12-01	HB7_cpx7_12	50.51	0.8612	3.32	7.57	0.1776	15.23	19.58	0.243	0.0739	0.023	97.5887
13	2014-12-01	HB7_cpx7_13	50.8	0.8774	2.98	8.11	0.2283	15.42	18.84	0.1951	0.0654	0.0241	97.5403
14	2014-12-01	HB7_cpx7_14	51.59	0.7322	2.28	8.68	0.2052	15.02	18.91	0.2452	0.0461	0.0215	97.7302
1	2014-12-01	HB7_cpx8_1	49.43	0.7432	3.97	7.18	0.1889	15.45	18.72	0.2932	0.2405	0.0414	96.2572
2	2014-12-01	HB7_cpx8_2	49.41	0.7433	3.95	7.19	0.1755	15.34	19	0.2573	0.237	0.0293	96.3324
3	2014-12-01	HB7_cpx8_3	51.18	0.7687	4.13	7.05	0.1909	15.39	19.28	0.2786	0.2486	0.0089	98.5257
4	2014-12-01	HB7_cpx8_4	51.09	0.7161	4.06	6.92	0.1597	15.21	19.55	0.2594	0.2718	0.0169	98.2539
5	2014-12-01	HB7_cpx8_5	51.33	0.7482	3.88	6.94	0.1531	15.44	19.35	0.2493	0.2498	0.0305	98.3709
6	2014-12-01	HB7_cpx8_6	51.88	0.6566	3.18	6.72	0.157	15.8	19.9	0.231	0.2223	0.0264	98.7733
7	2014-12-01	HB7_cpx8_7	51.12	0.7769	3.89	7.33	0.1852	15.16	19.6	0.2845	0.1449	0.0059	98.4974
8	2014-12-01	HB7_cpx8_8	51.46	0.7252	3.65	7.29	0.1765	15.44	19.61	0.2486	0.1623	0.0293	98.7919
9	2014-12-01	HB7_cpx8_9	51.98	0.6862	3.15	7.02	0.156	15.49	19.85	0.2459	0.1338	0.017	98.7289
10	2014-12-01	HB7_cpx8_10	52.12	0.8788	2.52	9.13	0.2255	14.79	19.33	0.2226	0.0434	0.0008	99.2611
11	2014-12-01	HB7_cpx8_11	52.78	0.643	1.8673	8.5	0.197	15.33	19.35	0.2168	0.0531	0.0068	98.944
1	2015-01-01	HB6_cpx1_1	50.61	0.8802	4.21	7.05	0.1813	15.57	18.9	0.2391	0.3421	0.0173	98
2	2015-01-01	HB6_cpx1_2	50.94	0.8334	3.88	7.24	0.1769	15.42	19.11	0.2616	0.2262	0.0059	98.094
3	2015-01-01	HB6_cpx1_3	50.91	0.8845	3.96	7.44	0.1797	15.38	19.11	0.2555	0.1822	0.0056	98.3075
4	2015-01-01	HB6_cpx1_4	51.31	0.7185	3.57	6.97	0.1897	15.77	19.44	0.2461	0.2982	0.019	98.5315
5	2015-01-01	HB6_cpx1_5	51.3	0.8599	3.96	7.24	0.1856	15.43	19.18	0.2686	0.1812	0.0297	98.635
6	2015-01-01	HB6_cpx1_6	51.62	0.6966	3.16	6.88	0.18	15.7	19.6	0.2385	0.2272	0.008	98.3103
7	2015-01-01	HB6_cpx1_7	51.57	0.7023	3.22	7.09	0.1832	15.67	19.39	0.2482	0.157	0.0257	98.2564
8	2015-01-01	HB6_cpx1_8	48.24	2.04	5.52	9.89	0.2356	13.48	18.26	0.293	0.0212	0.034	98.0138
9	2015-01-01	HB6_cpx1_9	51.88	0.722	2.2	8.75	0.2166	15.39	19.07	0.2334	0.0518	0.0177	98.5315
1	2015-01-01	HB6_cpx2_1	52.03	0.7639	3.57	7.33	0.1748	15.73	18.73	0.23	0.2056	0.0265	98.7908
2	2015-01-01	HB6_cpx2_2	52.13	0.6878	3.45	7.21	0.2149	16.19	18.47	0.2871	0.2094	0.0223	98.8715
3	2015-01-01	HB6_cpx2_3	52.05	0.7298	3.45	7.13	0.1811	15.97	18.77	0.2463	0.222	0.0217	98.7709
4	2015-01-01	HB6_cpx2_4	52.35	0.6453	3	6.85	0.1533	15.82	19.29	0.238	0.229	0.0198	98.5954
5	2015-01-01	HB6_cpx2_5	51.84	0.7851	3.47	7.29	0.1929	15.42	19.31	0.2593	0.161	0.022	98.7503
6	2015-01-01	HB6_cpx2_6	51.95	0.7888	3.31	7.35	0.1864	15.4	19.52	0.2374	0.1587	0.0115	98.9128
7	2015-01-01	HB6_cpx2_7	52.39	0.7568	2.74	7.64	0.1714	15.78	19.01	0.2154	0.14	0.0469	98.8905
1	2015-01-01	HB6_cpx3_1	51.32	0.8448	4.03	7.6	0.1912	16.14	17.96	0.2493	0.2732	0.0086	98.6171
2	2015-01-01	HB6_cpx3_2	51.13	0.938	4.16	6.97	0.169	15.15	19.34	0.2819	0.3334	0.0002	98.4725
3	2015-01-01	HB6_cpx3_3	51.9	0.8907	4.11	7.08	0.1789	15.51	19.22	0.2937	0.3327	0.0002	99.5162
4	2015-01-01	HB6_cpx3_4	51.25	0.9466	4.27	7	0.1424	15.23	19.63	0.2514	0.3099	0.0195	99.0498
5	2015-01-01	HB6_cpx3_5	51.39	0.7783	4.14	7.05	0.1619	15.33	19.32	0.243	0.2547	0.0095	98.6774
6	2015-01-01	HB6_cpx3_6	51.43	0.7628	4.08	7.08	0.1737	14.97	19.34	0.2679	0.2373	0.0326	98.3743
7	2015-01-01	HB6_cpx3_7	51.68	0.7371	4	7.12	0.1669	15.32	19.28	0.2536	0.218	0.0386	98.8142
8	2015-01-01	HB6_cpx3_8	51.67	0.7141	3.9	6.93	0.188	15.44	19.45	0.2626	0.2337	0.034	98.8224
9	2015-01-01	HB6_cpx3_9	52.3	0.6088	3.19	6.6	0.1574	15.67	19.71	0.2559	0.2339	0.009	98.735
10	2015-01-01	HB6_cpx3_10	51.84	0.7016	3.4	7	0.1776	15.54	19.59	0.2109	0.1616	0	98.6217
11	2015-01-01	HB6_cpx3_11	51.74	0.7406	3.66	7.49	0.1934	15.43	19.28	0.2432	0.1406	0.024	98.9418
12	2015-01-01	HB6_cpx3_12	52.22	0.5983	2.77	6.85	0.1854	15.88	19.47	0.2468	0.1769	0.0203	98.4177
13	2015-01-01	HB6_cpx3_13	52.38	0.6346	2.95	7.06	0.1722	15.97	19.31	0.2169	0.1853	0.0078	98.8868
14	2015-01-01	HB6_cpx3_14	52.26	0.6537	3.06	7.36	0.2003	15.85	19.28	0.237	0.1424	0.005	99.0484
15	2015-01-01	HB6_cpx3_15	52.9	0.5267	2.3	6.92	0.1889	16.27	19.45	0.2262	0.1187	0.008	98.9085
16	2015-01-01	HB6_cpx3_16	52.7	0.5909	2.7	7.34	0.2219	16.24	18.64	0.2053	0.1285	0.0285	98.7951
1	2015-01-01	HB6_cpx4_1	51.63	0.7864	3.85	7.23	0.2033	15.69	18.72	0.2632	0.2491	0.0205	98.6425
2	2015-01-01	HB6_cpx4_2	51.73	0.8276	3.93	7.28	0.1763	15.77	18.62	0.2533	0.223	0.0197	98.8299
3	2015-01-01	HB6_cpx4_3	51.47	0.8992	4.12	7.13	0.17	15.29	19.11	0.2721	0.2497	0.0158	98.7268
4	2015-01-01	HB6_cpx4_4	51.74	0.7994	4.08	7.06	0.1671	15.45	19.46	0.3072	0.2443	0	99.308
5	2015-01-01	HB6_cpx4_5	51.51	0.8049	4.02	7.16	0.1792	15.54	18.92	0.2366	0.2276	0.0398	98.6381
6	2015-01-01	HB6_cpx4_6	51.42	0.8639	4.05	7.13	0.1721	15.31	19.37	0.2306	0.2289	0.02	98.7955
7	2015-01-01	HB6_cpx4_7	51.61	0.8579	4.08	7.6	0.1789	15.96	18.24	0.243	0.2474	0.0238	99.041
8	2015-01-01	HB6_cpx4_8	51.91	0.7998	3.99	7.52	0.1954	15.89	18.34	0.2474	0.288	0.0444	99.225
9	2015-01-01	HB6_cpx4_9	51.93	0.7442	3.94	7.56	0.1871	16.27	17.97	0.2455	0.2639	0.0145	99.1252
10	2015-01-01	HB6_cpx4_10	53.8	0.4223	2.08	7.86	0.2351	17.86	16.31	0.2189	0.1768	0.0338	98.9969
11	2015-01-01	HB6_cpx4_11	53.26	0.4681	2.06	6.77	0.1918	16.58	19.08	0.1976	0.1875	0.01	98.805
12	2015-01-01	HB6_cpx4_12	53.4	0.5907	1.9	8.95	0.2254	16.74	16.93	0.1515	0.0558	0.0197	98.9631
13	2015-01-01	HB6_cpx4_13	52.78	0.675	1.96	10.39	0.3242	15.88	16.68	0.1626	0.0095	0.0141	98.8754
14	2015-01-01	HB6_cpx4_14	53.4	0.5521	1.6946	8.81	0.2291	15.44	18.96	0.2113	0.0423	0.023	99.3624
1	2015-01-01	HB6_cpx5_1	51.72	0.9423	3.7	7.8	0.1942	15.5	18.62	0.2421	0.1914	0.0283	98.9383
2	2015-01-01	HB6_cpx5_2	51.51	0.9119	3.71	7.81	0.1826	15.47	18.62	0.2325	0.1653	0.0035	98.6158
3	2015-01-01	HB6_cpx5_3	52.78	0.6485	2.9	6.83	0.1677	15.99	19.52	0.2195	0.2153	0.0311	99.3021
4	2015-01-01	HB6_cpx5_4	51.78	0.9306	3.53	7.99	0.2168	15.4	18.75	0.235	0.1435	0.0447	99.0206
5	2015-01-01	HB6_cpx5_5	51.62	0.9849	3.75	7.9	0.1917	15.42	18.86	0.2324	0.132	0.031	99.122
6	2015-01-01	HB6_cpx5_6	52.09	0.7715	3.25	7.36	0.198	15.56	19.22	0.2527	0.1712	0.0117	98.8851
7	2015-01-01	HB6_cpx5_7	51.87	0.7476	3.62	7.52	0.1747	15.39	19.11	0.2555	0.185	0.0313	98.9041
8	2015-01-01	HB6_cpx5_8	51.89	0.754	3.59	7.44	0.1754	15.19	19.27	0.2494	0.1497	0.025	98.7335
9	2015-01-01	HB6_cpx5_9	51.7	0.7491	3.73	7.59	0.2049	15.42	19.16	0.2373	0.1806	0.011	98.9829
10	2015-01-01	HB6_cpx5_10	52.1	0.7102	3.25	7.02	0.1749	15.57	19.59	0.2171	0.1964	0.0291	98.8577
11	2015-01-01	HB6_cpx5_11	52.14	0.7275	3.33	7.17	0.184	15.49	19.46	0.2619	0.1835	0.0155	98.9624
12	2015-01-01	HB6_cpx5_12	52.79	0.5537	2.45	7.08	0.2073	16.28	19.18	0.198	0.1113	0.0446	98.8949
13	2015-01-01	HB6_cpx5_13	52.26	0.7457	3.12	7.47	0.1859	15.54	19.29	0.26	0.1141	0.0102	98.9959
14	2015-01-01	HB6_cpx5_14	52.28	0.6537	2.96	7.14	0.1894	15.49	19.81	0.2224	0.1491	0.013	98.9076
15	2015-01-01	HB6_cpx5_15	51.63	0.8116	3.57	7.78	0.1801	15.18	19.52	0.268	0.095	0.0135	99.0482
16	2015-01-01	HB6_cpx5_16	52.13	0.7267	3.06	7.47	0.1882	15.41	19.63	0.2521	0.1096	0.0119	98.9885
17	2015-01-01	HB6_cpx5_17	51.84	0.7911	3.39	7.79	0.2074	15.21	19.51	0.2419	0.1043	0.02	99.1047
18	2015-01-01	HB6_cpx5_18	52.65	0.6775	2.72	7.42	0.1756	15.26	19.91	0.2261	0.0616	0.0168	99.1176
19	2015-01-01	HB6_cpx5_19	51.8	0.9734	2.97	9.66	0.2313	14.64	18.28	0.2286	0.033	0.017	98.8333
20	2015-01-01	HB6_cpx5_20	52.73	0.668	2.08	8.78	0.2376	15.23	18.78	0.2339	0.0611	0.016	98.8166
1	2015-01-01	HB6_cpx6_1	53.03	0.5734	2.87	6.82	0.1676	16.13	19.16	0.2194	0.242	0.0002	99.2126
2	2015-01-01	HB6_cpx6_2	53.53	0.4807	2.15	6.98	0.1854	16.65	18.81	0.2179	0.1398	0.025	99.1688
3	2015-01-01	HB6_cpx6_3	54.01	0.421	1.7744	7.69	0.2129	17.91	16.5	0.1941	0.175	0.001	98.8884
4	2015-01-01	HB6_cpx6_4	52.45	0.6966	3.15	7.07	0.1854	15.68	19.57	0.2323	0.2166	0.0187	99.2696
5	2015-01-01	HB6_cpx6_5	51.82	0.8696	3.67	7.51	0.1957	15.19	19.18	0.2435	0.1725	0.0321	98.8834
6	2015-01-01	HB6_cpx6_6	52.11	0.7434	3.18	7.42	0.1967	15.47	19.23	0.2176	0.1519	0.0207	98.7403
7	2015-01-01	HB6_cpx6_7	51.87	0.7745	3.38	7.83	0.1904	15.61	18.72	0.2384	0.1208	0.008	98.7421
8	2015-01-01	HB6_cpx6_8	51.81	0.7979	3.68	8.03	0.1994	15.53	18.38	0.2616	0.0957	0.0088	98.7934
9	2015-01-01	HB6_cpx6_9	51.83	0.7363	3.77	7.88	0.2107	15.26	18.83	0.2607	0.1131	0.0187	98.9095
10	2015-01-01	HB6_cpx6_10	52.12	0.7276	3.32	7.43	0.1785	15.52	19.3	0.2655	0.1381	0.0243	99.024
11	2015-01-01	HB6_cpx6_11	52.52	0.7962	2.85	8.06	0.2004	15.42	19.1	0.2034	0.0937	0.0225	99.2662
12	2015-01-01	HB6_cpx6_12	52.18	0.8471	3.09	8.43	0.2505	15.39	18.5	0.1921	0.11	0.0182	99.0079
13	2015-01-01	HB6_cpx6_13	52.66	0.7546	2.73	8.57	0.2182	15.81	17.96	0.2031	0.089	0.0055	99.0004
1	2015-01-01	HB6_cpx7_1	53.62	0.4648	1.91	7.8	0.2248	17.22	17.51	0.1636	0.0725	0.0338	99.0195
2	2015-01-01	HB6_cpx7_2	53.51	0.4534	1.71	7.88	0.2088	17.5	17.35	0.1602	0.1028	0.0402	98.9154
3	2015-01-01	HB6_cpx7_3	51.01	0.5284	2.68	7.18	0.2024	15.54	17.4	0.2058	0.1602	0.0318	94.9386
4	2015-01-01	HB6_cpx7_4	52.51	0.572	2.8	6.93	0.2067	16.05	18.94	0.2468	0.196	0.0281	98.4796
5	2015-01-01	HB6_cpx7_5	51.35	0.8897	3.6	7.37	0.1788	15.28	19.1	0.2117	0.1989	0.0172	98.1963
6	2015-01-01	HB6_cpx7_6	51.83	0.7534	3.33	6.92	0.1815	15.37	19.37	0.2292	0.228	0.0117	98.2238
7	2015-01-01	HB6_cpx7_7	51.48	0.9132	3.72	7.33	0.1708	15.33	19.17	0.2267	0.1852	0.0307	98.5566
8	2015-01-01	HB6_cpx7_8	51.8	0.7728	3.37	7.25	0.1779	15.4	19.32	0.2252	0.2046	0.019	98.5395
9	2015-01-01	HB6_cpx7_9	52.1	0.6841	3.1	7.05	0.155	15.63	19.32	0.2227	0.1865	0.0162	98.4645
10	2015-01-01	HB6_cpx7_10	52.75	0.7067	2.4	8.1	0.1959	15.54	18.84	0.2131	0.0642	0.0123	98.8222
1	2015-01-01	HB6_cpx8_1	53.81	0.3902	1.6447	7.5	0.2381	18.06	16.85	0.1901	0.2013	0.0277	98.9121
2	2015-01-01	HB6_cpx8_2	51.26	0.896	4.05	7.58	0.2136	15.94	18.14	0.2316	0.359	0.0305	98.7007
3	2015-01-01	HB6_cpx8_3	51.12	0.928	4.11	7.16	0.169	15.27	19.21	0.2505	0.3595	0.0436	98.6206
4	2015-01-01	HB6_cpx8_4	51.42	0.8994	3.95	7.09	0.1688	15.32	19.37	0.2556	0.2801	0.0223	98.7762
5	2015-01-01	HB6_cpx8_5	51.95	0.7529	3.44	6.94	0.1874	15.46	19.42	0.2469	0.2249	0.0141	98.6362
6	2015-01-01	HB6_cpx8_6	51.5	0.8232	3.51	7.24	0.2017	15.46	19.37	0.2446	0.1536	0.0358	98.5389
7	2015-01-01	HB6_cpx8_7	51.9	0.7635	3.3	7.03	0.1847	15.44	19.51	0.2509	0.2008	0.0295	98.6094
8	2015-01-01	HB6_cpx8_8	52.07	0.6184	3.05	6.83	0.1793	15.52	19.65	0.212	0.1915	0.0143	98.3355
9	2015-01-01	HB6_cpx8_9	51.49	0.841	3.59	7.56	0.2224	15.43	19.28	0.2393	0.1621	0.0198	98.8346
10	2015-01-01	HB6_cpx8_10	51.2	0.9728	3.83	8.09	0.2133	15	19.07	0.2377	0.095	0.0297	98.7385
11	2015-01-01	HB6_cpx8_11	51.37	0.7977	3.51	7.64	0.1833	15.26	19.19	0.2484	0.1218	0.02	98.3412
12	2015-01-01	HB6_cpx8_12	51.53	0.8282	3.55	7.63	0.207	15.32	19.11	0.2426	0.1103	0.0242	98.5523
13	2015-01-01	HB6_cpx8_13	51.77	0.9909	2.88	9.34	0.2475	15.14	17.8	0.274	0.0384	0.0182	98.499
1	2015-01-01	HB5_cpx1_1	52.65	0.5847	2.74	8.15	0.2198	16.74	17.19	0.2029	0.084	0.0223	98.5837
2	2015-02-01	HB5_cpx1_2	53.02	0.6584	1.91	9.12	0.2647	15.49	18.01	0.2316	0.0815	0	98.7862
3	2015-02-01	HB5_cpx1_3	52.16	0.708	3.07	7.94	0.217	16.12	17.77	0.2315	0.1116	0.016	98.3441
4	2015-02-01	HB5_cpx1_4	51.46	0.8849	3.59	8.24	0.1852	15.55	17.88	0.2405	0.0984	0.0245	98.1535
5	2015-02-01	HB5_cpx1_5	52	0.7536	3.15	7.85	0.201	15.89	18.26	0.2294	0.1499	0.0187	98.5026
6	2015-02-01	HB5_cpx1_6	52.09	0.6437	3.13	6.89	0.1807	15.7	19.18	0.2123	0.2467	0.0172	98.2906
7	2015-02-01	HB5_cpx1_7	52.05	0.6591	3.07	7	0.1876	15.54	19.3	0.2393	0.2104	0.0211	98.2775
8	2015-02-01	HB5_cpx1_8	51.89	0.7082	3.19	7.26	0.1977	15.38	19.23	0.2524	0.1994	0.0065	98.3142
9	2015-02-01	HB5_cpx1_9	51.24	0.8814	3.63	7.74	0.2018	15.23	18.75	0.2666	0.1237	0	98.0635
10	2015-02-01	HB5_cpx1_10	52.1	0.6726	3	7.22	0.1912	15.49	19.51	0.2269	0.1423	0.011	98.564
11	2015-02-01	HB5_cpx1_11	51.67	0.8621	3.49	7.62	0.19	15.01	19.02	0.2528	0.1392	0.007	98.2611
12	2015-02-01	HB5_cpx1_12	51.89	0.8877	2.86	8.44	0.2059	15.25	18.32	0.2233	0.0921	0.0448	98.2138
13	2015-02-01	HB5_cpx1_13	52.09	0.8658	2.48	9.85	0.2078	14.77	18.07	0.2342	0.0074	0.0178	98.593
14	2015-02-01	HB5_cpx1_14	52.83	0.6959	2.04	8.79	0.1902	15.14	18.83	0.2181	0.044	0.0068	98.785
15	2015-02-01	HB5_cpx1_15	52.67	0.682	2.04	8.73	0.1976	15.05	18.98	0.2254	0.067	0.0317	98.6737
1	2015-02-01	HB5_cpx2_1	51.26	0.8199	4.13	7.87	0.2137	15.85	17.81	0.2606	0.3088	0.05	98.573
2	2015-02-01	HB5_cpx2_2	50.82	1.0018	4.29	7.2	0.1757	15.07	18.98	0.2523	0.3561	0.0211	98.167
3	2015-02-01	HB5_cpx2_3	51.98	0.6842	3.12	6.8	0.1836	15.66	19.09	0.2376	0.2927	0.0281	98.0762
4	2015-02-01	HB5_cpx2_4	52.73	0.5488	2.57	6.72	0.1993	15.98	19.41	0.2229	0.2189	0.0295	98.6294
5	2015-02-01	HB5_cpx2_5	51.74	0.7908	3.47	7.22	0.1954	15.42	19.1	0.2459	0.2222	0.027	98.4313
6	2015-02-01	HB5_cpx2_6	51.52	0.8653	3.63	7.29	0.1769	15.3	19.16	0.2485	0.2225	0.0008	98.414
7	2015-02-01	HB5_cpx2_7	51.57	0.7318	3.69	7.58	0.1827	15.38	18.96	0.2473	0.1657	0.012	98.5195
8	2015-02-01	HB5_cpx2_8	51.5	0.805	3.77	7.8	0.1895	15.13	18.96	0.2422	0.1309	0.0338	98.5614
9	2015-02-01	HB5_cpx2_9	51.3	0.8048	3.82	7.97	0.1891	15.12	18.81	0.2665	0.1119	0.0313	98.4236
10	2015-02-01	HB5_cpx2_10	51.56	0.8155	3.84	8.2	0.1999	14.98	18.75	0.2362	0.0776	0.0182	98.6774
11	2015-02-01	HB5_cpx2_11	51.32	0.8108	3.72	8.13	0.1912	15.02	18.81	0.2473	0.0961	0.0197	98.3651
12	2015-02-01	HB5_cpx2_12	51.82	0.7659	3.54	7.9	0.2158	15	19.11	0.2899	0.1087	0.0342	98.7845
13	2015-02-01	HB5_cpx2_13	51.99	0.7287	3.3	7.37	0.1916	14.96	19.38	0.2775	0.1202	0.028	98.346
14	2015-02-01	HB5_cpx2_14	52.5	0.6269	2.87	7.1	0.1905	15.26	19.66	0.2661	0.1159	0.0233	98.6127
15	2015-02-01	HB5_cpx2_15	51.6	0.7399	3.48	7.79	0.1919	15.2	19.24	0.238	0.1032	0.0233	98.6063
16	2015-02-01	HB5_cpx2_16	52.75	0.6766	2.1	8.34	0.2045	15.18	19.07	0.194	0.0481	0.0197	98.5829
1	2015-02-01	HB5_cpx3_1	51.48	0.8317	3.92	7.12	0.1485	15.14	19.2	0.2122	0.3147	0.0153	98.3824
2	2015-02-01	HB5_cpx3_2	52.21	0.6101	3	6.59	0.1756	15.48	19.64	0.2618	0.2779	0.0035	98.2489
3	2015-02-01	HB5_cpx3_3	51.76	0.8322	3.53	7.57	0.2155	15.35	18.81	0.2078	0.2112	0.031	98.5177
4	2015-02-01	HB5_cpx3_4	52.2	0.7191	3.16	7.69	0.1808	15.9	18.25	0.2463	0.2206	0.0222	98.589
5	2015-02-01	HB5_cpx3_5	52.7	0.6988	2.25	9	0.2208	15.2	18.33	0.2192	0.1025	0.0131	98.7344
6	2015-02-01	HB5_cpx3_6	52.89	0.6231	2.57	7.23	0.1774	15.49	19.56	0.2246	0.1074	0.0075	98.88
7	2015-02-01	HB5_cpx3_7	52.87	0.699	2.24	9.19	0.2411	15.74	17.33	0.2664	0.0619	0.0355	98.6739
8	2015-02-01	HB5_cpx3_8	53.21	0.6792	1.7895	9.28	0.2475	15.06	18.76	0.2023	0.0526	0.0293	99.3104
1	2015-02-01	HB5_cpx3b_1	51.65	0.8233	3.76	6.87	0.1822	15.02	19.84	0.244	0.2298	0.0215	98.6408
2	2015-02-01	HB5_cpx3b_2	51.72	0.7972	3.68	7.12	0.166	15.04	19.31	0.2267	0.2361	0.023	98.319
3	2015-02-01	HB5_cpx3b_3	51.76	0.7843	3.61	7.24	0.1686	15.25	19.27	0.2224	0.2339	0.0199	98.5591
4	2015-02-01	HB5_cpx3b_4	51.86	0.7974	3.74	7.12	0.1898	15.36	19.15	0.283	0.262	0.0308	98.793
5	2015-02-01	HB5_cpx3b_5	51.82	0.7704	3.64	7.19	0.1577	15.37	18.94	0.2379	0.2683	0.0043	98.3986
6	2015-02-01	HB5_cpx3b_6	52.29	0.6295	3.17	6.72	0.1461	15.29	19.58	0.2301	0.3068	0.0281	98.3906
7	2015-02-01	HB5_cpx3b_7	52.07	0.6891	3.37	7.12	0.1775	15.26	19.2	0.2165	0.2261	0.024	98.3532
8	2015-02-01	HB5_cpx3b_8	52.52	0.6347	3.1	6.99	0.1907	15.27	19.69	0.241	0.1999	0	98.8363
9	2015-02-01	HB5_cpx3b_9	52.3	0.6652	3.29	7.12	0.1712	15.21	19.48	0.2686	0.1822	0.0028	98.69
10	2015-02-01	HB5_cpx3b_10	51.68	0.7559	3.7	7.79	0.2022	14.96	18.99	0.2809	0.1031	0.0293	98.4914
11	2015-02-01	HB5_cpx3b_11	51.74	0.81	3.62	7.83	0.1816	14.81	19.19	0.2311	0.0691	0.0365	98.5183
12	2015-02-01	HB5_cpx3b_12	52.12	0.6992	3.13	7.28	0.149	15.13	19.58	0.2273	0.1147	0.0103	98.4405
13	2015-02-01	HB5_cpx3b_13	52.36	0.668	3.01	7.2	0.1736	15.11	19.63	0.2292	0.1548	0.0115	98.5471
14	2015-02-01	HB5_cpx3b_14	52.49	0.7939	2.77	8.27	0.2054	14.82	18.86	0.2215	0.0865	0.0225	98.5398
15	2015-02-01	HB5_cpx3b_15	51.95	0.8874	2.94	8.86	0.2105	14.51	18.67	0.2317	0.0414	0.0222	98.3232
16	2015-02-01	HB5_cpx3b_16	52.05	0.9516	2.77	9.51	0.212	14.17	18.58	0.2262	0.0281	0.0117	98.5096
1	2015-02-01	HB5_cpx4_1	51.26	0.9092	3.95	6.89	0.1476	14.89	19.79	0.247	0.3943	0.0257	98.5038
2	2015-02-01	HB5_cpx4_2	51.86	0.7711	3.93	7.31	0.201	15.65	18.35	0.2206	0.2898	0.0335	98.616
3	2015-02-01	HB5_cpx4_3	51.78	0.715	3.71	7.27	0.179	15.49	18.48	0.2485	0.2369	0.016	98.1254
4	2015-02-01	HB5_cpx4_4	51.88	0.6238	3.38	7	0.185	15.68	18.88	0.2299	0.2686	0.0314	98.1587
5	2015-02-01	HB5_cpx4_5	52.23	0.655	2.98	7.3	0.177	15.86	18.64	0.2293	0.2146	0.0179	98.3038
6	2015-02-01	HB5_cpx4_6	51.28	0.8668	3.89	7.62	0.2002	15.11	19.06	0.254	0.1147	0	98.3957
7	2015-02-01	HB5_cpx4_7	51.68	0.9036	3.67	7.39	0.1864	14.8	19.5	0.2299	0.1485	0.0369	98.5453
8	2015-02-01	HB5_cpx4_8	52.48	0.6603	2.99	7.21	0.1937	15.46	19.43	0.2499	0.1551	0.0119	98.8409
9	2015-02-01	HB5_cpx4_9	51.2	0.8954	3.51	7.89	0.1695	15.05	18.96	0.2381	0.0993	0.0162	98.0285
10	2015-02-01	HB5_cpx4_10	52.07	0.7616	3.12	7.58	0.1694	15.34	19.25	0.1962	0.1362	0.008	98.6314
11	2015-02-01	HB5_cpx4_11	52.07	0.908	2.41	9.31	0.2341	14.63	18.77	0.2029	0.0328	0.0142	98.582
1	2015-02-01	HB5_cpx5_1	51.61	0.7536	3.9	7.66	0.1776	15.64	17.86	0.2538	0.2171	0.0357	98.1078
2	2015-02-01	HB5_cpx5_2	51.63	0.8047	3.76	7.23	0.1819	15.29	18.76	0.2469	0.2747	0.021	98.1992
3	2015-02-01	HB5_cpx5_3	51.53	0.8433	3.65	7.62	0.1791	15.26	18.78	0.256	0.1918	0.0207	98.3309
4	2015-02-01	HB5_cpx5_4	52.49	0.6573	2.86	6.71	0.1746	15.41	19.37	0.2344	0.2197	0.0167	98.1427
5	2015-02-01	HB5_cpx5_5	51.82	0.8344	3.46	7.49	0.2056	14.98	19.21	0.2442	0.1816	0	98.4258
6	2015-02-01	HB5_cpx5_6	51.89	0.7983	3.39	7.45	0.1921	15.17	18.94	0.2512	0.1666	0.0197	98.2679
7	2015-02-01	HB5_cpx5_7	51.05	1.0359	3.95	7.91	0.2115	14.78	18.69	0.2548	0.1139	0.026	98.0221
8	2015-02-01	HB5_cpx5_8	52.08	0.7157	3.03	7.14	0.1741	15.17	19.5	0.2381	0.1499	0.021	98.2188
9	2015-02-01	HB5_cpx5_9	52.56	0.6763	2.75	7.39	0.1686	15.28	19.31	0.2237	0.1363	0.0187	98.5136
10	2015-02-01	HB5_cpx5_10	52.65	0.683	2.01	8.8	0.2102	14.69	19.14	0.2101	0.0437	0.0167	98.4537
1	2015-02-01	HB5_cpx6_1	53.79	0.4058	1.7099	7.63	0.214	17.53	17.07	0.1855	0.1662	0.0085	98.7099
2	2015-02-01	HB5_cpx6_2	54.01	0.3776	1.6486	7.75	0.2198	17.81	16.48	0.1848	0.1473	0.0224	98.6505
3	2015-02-01	HB5_cpx6_3	51.49	0.7074	3.9	7.39	0.1854	15.41	18.69	0.2698	0.2856	0.0105	98.3387
4	2015-02-01	HB5_cpx6_4	51.72	0.7253	3.84	7.09	0.2084	15.09	19.54	0.2313	0.2608	0.017	98.7228
5	2015-02-01	HB5_cpx6_5	51.76	0.7236	3.55	7.18	0.2009	14.98	19.89	0.2353	0.19	0.0109	98.7207
6	2015-02-01	HB5_cpx6_6	51.66	0.784	3.65	7.56	0.1916	14.78	19.63	0.2561	0.1101	0.0339	98.6557
7	2015-02-01	HB5_cpx6_7	52.55	0.6485	2.85	6.81	0.1632	15.18	20.48	0.2518	0.1764	0.03	99.1399
8	2015-02-01	HB5_cpx6_8	51.47	0.854	3.66	7.81	0.2108	14.79	19.54	0.236	0.0645	0.0167	98.652
9	2015-02-01	HB5_cpx6_9	51.29	0.8729	3.6	7.8	0.2059	14.72	19.29	0.2392	0.0627	0.0077	98.0884
10	2015-02-01	HB5_cpx6_10	51.78	0.7315	3.2	7.15	0.1884	14.8	20.13	0.2623	0.1316	0.0479	98.4217
11	2015-02-01	HB5_cpx6_11	49.92	1.4086	5.11	8.66	0.2117	13.88	18.95	0.2994	0.0354	0.0102	98.4853
12	2015-02-01	HB5_cpx6_12	52.45	0.6853	2.08	8.47	0.2339	14.65	19.43	0.2345	0.0462	0.0135	98.2934
13	2015-02-01	HB5_cpx6_13	52.74	0.6273	1.93	8.5	0.2169	14.61	19.73	0.2468	0.0364	0	98.6374
1	2015-02-01	HB5_cpx7_1	53.94	0.4258	1.6468	8.54	0.2564	17.55	16.23	0.1186	0.0771	0.0171	98.8018
2	2015-02-01	HB5_cpx7_2	52.11	0.735	3.36	7.99	0.198	15.74	18.09	0.2582	0.141	0.0145	98.6367
3	2015-02-01	HB5_cpx7_3	51.78	0.8369	3.45	8.29	0.2264	15.53	18.03	0.2399	0.1203	0.016	98.5195
4	2015-02-01	HB5_cpx7_4	51.44	0.909	3.75	7.84	0.1733	14.94	18.86	0.2881	0.137	0	98.3374
5	2015-02-01	HB5_cpx7_5	52.67	0.656	2.88	7.25	0.1852	15.29	19.58	0.2571	0.1208	0.0344	98.9235
6	2015-02-01	HB5_cpx7_6	51.54	0.8844	3.55	7.87	0.1938	15.02	19.01	0.2255	0.1016	0.0113	98.4066
7	2015-02-01	HB5_cpx7_7	52.85	0.5568	2.34	7.83	0.2346	15.96	18.37	0.1887	0.0857	0.0345	98.4503
8	2015-02-01	HB5_cpx7_8	51.74	0.8485	3.23	8.24	0.217	14.9	19.07	0.2441	0.0714	0.0179	98.5789
9	2015-02-01	HB5_cpx7_9	51.67	0.8768	3.32	8.21	0.2005	14.91	18.88	0.2238	0.0921	0.0371	98.4203
10	2015-02-01	HB5_cpx7_10	52.71	0.8276	2.4	9.63	0.2465	15.52	17.22	0.23	0.0375	0.014	98.8356
11	2015-02-01	HB5_cpx7_11	52.47	0.8004	2.54	8.63	0.2272	14.98	18.67	0.1991	0.088	0.0224	98.6271
12	2015-02-01	HB5_cpx7_12	52.77	0.7062	2.14	9.24	0.242	14.92	18.67	0.2433	0.0279	0.0125	98.9719
1	2015-03-01	HB4_cpx1_1	51.16	0.8825	4.1	7.29	0.2009	15.18	18.47	0.2795	0.3642	0.0154	97.9425
2	2015-03-01	HB4_cpx1_2	51.03	0.9723	4.37	7.31	0.1917	14.93	18.8	0.2782	0.2986	0.0345	98.2153
3	2015-03-01	HB4_cpx1_3	50.85	0.9355	4.24	7.06	0.1667	14.6	19.59	0.249	0.2428	0.0053	97.9393
4	2015-03-01	HB4_cpx1_4	52.36	0.669	3.1	6.59	0.1982	15.03	20.22	0.2212	0.2376	0.0115	98.6375
5	2015-03-01	HB4_cpx1_5	49.92	1.0375	4.19	7.63	0.1994	14.23	19.12	0.2622	0.111	0	96.7001
6	2015-03-01	HB4_cpx1_6	51.07	0.921	3.89	7.94	0.2036	14.73	18.93	0.2432	0.0794	0.0235	98.0307
7	2015-03-01	HB4_cpx1_7	51.58	0.8438	3.58	7.63	0.2013	15.04	18.92	0.2163	0.1336	0.0419	98.1869
8	2015-03-01	HB4_cpx1_8	51.53	0.7876	3.35	7.11	0.1537	14.98	19.86	0.2454	0.1977	0.0075	98.2219
9	2015-03-01	HB4_cpx1_9	51.85	0.6962	3.18	7.04	0.1886	15.22	19.59	0.2242	0.1939	0.0095	98.1924
10	2015-03-01	HB4_cpx1_10	52.23	0.6773	3.01	7.17	0.1594	15.27	19.41	0.2738	0.154	0.007	98.3615
11	2015-03-01	HB4_cpx1_11	50.55	1.3108	3.75	10.35	0.2714	13.41	18.26	0.2562	0.0206	0.0242	98.2032
12	2015-03-01	HB4_cpx1_12	51.86	0.9467	2.72	9.22	0.2382	14.51	18.75	0.2117	0.055	0.0396	98.5512
13	2015-03-01	HB4_cpx1_13	52.59	0.67	1.95	8.74	0.2475	14.73	19.32	0.233	0.0448	0.017	98.5423
1	2015-03-01	HB4_cpx2_1	52.15	0.6733	3.28	7.29	0.169	15.25	18.97	0.2514	0.1581	0.0357	98.2275
2	2015-03-01	HB4_cpx2_2	51.64	0.7421	3.96	7.24	0.1879	15.03	18.84	0.2604	0.2576	0.0434	98.2014
3	2015-03-01	HB4_cpx2_3	51.25	0.8278	3.89	7.53	0.1652	15.14	18.83	0.2355	0.1881	0	98.0566
4	2015-03-01	HB4_cpx2_4	51.54	0.7661	3.86	7.34	0.1714	15.24	18.85	0.2215	0.249	0.0296	98.2676
5	2015-03-01	HB4_cpx2_5	51.98	0.7454	3.39	7.15	0.2008	15.4	19.01	0.2246	0.229	0.0255	98.3553
6	2015-03-01	HB4_cpx2_6	51.69	0.8161	3.57	7.37	0.1973	15.18	18.89	0.2406	0.1575	0.0197	98.1312
7	2015-03-01	HB4_cpx2_7	51.94	0.7621	3.33	7.04	0.1673	15.16	19.37	0.2147	0.2087	0.0228	98.2156
8	2015-03-01	HB4_cpx2_8	51.61	0.8184	3.51	7.26	0.2079	14.93	19.31	0.23	0.1628	0.0035	98.0426
9	2015-03-01	HB4_cpx2_9	51.97	0.7951	3.24	7.07	0.187	14.76	19.94	0.2357	0.179	0.0237	98.4005
10	2015-03-01	HB4_cpx2_10	51.94	0.7691	3.09	6.96	0.1632	14.79	19.92	0.2484	0.1541	0.0179	98.0527
11	2015-03-01	HB4_cpx2_11	51.45	0.8411	3.22	7.63	0.1732	14.73	19.3	0.2299	0.0854	0.003	97.6626
12	2015-03-01	HB4_cpx2_12	51.31	0.9752	3.46	8.08	0.2215	14.47	19.41	0.2667	0.0871	0.0097	98.2902
13	2015-03-01	HB4_cpx2_13	52.47	0.8141	2.31	9.37	0.2337	14.63	18.37	0.1825	0.0238	0.0346	98.4387
1	2015-03-01	HB4_cpx3_1	53.58	0.4015	1.99	5.56	0.1563	16.32	19.77	0.2002	0.3496	0.0323	98.3599
2	2015-03-01	HB4_cpx3_2	52.26	0.545	3.13	5.71	0.1365	15.8	19.75	0.2253	0.5362	0.0549	98.1479
3	2015-03-01	HB4_cpx3_3	52.27	0.5865	3.05	6.57	0.1614	15.38	19.75	0.2315	0.2916	0.0335	98.3245
4	2015-03-01	HB4_cpx3_4	51.58	0.7198	3.78	7.45	0.1737	15.51	18.27	0.2357	0.2434	0.0324	97.995
5	2015-03-01	HB4_cpx3_5	51.34	0.785	4.11	7.48	0.1972	15.42	18.33	0.2546	0.2388	0.0039	98.1595
6	2015-03-01	HB4_cpx3_6	51.39	0.7564	3.99	7.61	0.1875	15.6	18.07	0.2798	0.2795	0.0043	98.1675
7	2015-03-01	HB4_cpx3_7	51.25	0.8622	3.9	7.55	0.1828	15.11	18.84	0.243	0.1272	0.0511	98.1163
8	2015-03-01	HB4_cpx3_8	52.4	0.5938	3.02	6.73	0.1714	15.58	19.44	0.2242	0.2312	0	98.3906
9	2015-03-01	HB4_cpx3_9	53.11	0.4813	2.12	7.09	0.1971	15.97	19.08	0.1865	0.0886	0.018	98.3415
10	2015-03-01	HB4_cpx3_10	53.1	0.6043	2.1	8.38	0.2399	15.71	18.19	0.2087	0.0624	0.0234	98.6187
1	2015-03-01	HB4_cpx4_1	53.72	0.3979	1.7381	7.58	0.2336	17.5	16.71	0.1566	0.1891	0.0117	98.237
2	2015-03-01	HB4_cpx4_2	51.63	0.8113	3.86	7.31	0.1774	15.35	18.91	0.2386	0.3077	0.01	98.605
3	2015-03-01	HB4_cpx4_3	51.51	0.7797	3.82	7.21	0.1875	15.22	18.79	0.2575	0.2739	0.0122	98.0608
4	2015-03-01	HB4_cpx4_4	52.39	0.5712	2.86	6.74	0.1819	15.41	19.57	0.2372	0.26	0.0384	98.2587
5	2015-03-01	HB4_cpx4_5	51.8	0.717	3.16	7.28	0.1708	15.22	19.19	0.2328	0.1637	0.007	97.9413
6	2015-03-01	HB4_cpx4_6	51.8	0.7684	3.32	7.61	0.1877	15.15	19.01	0.241	0.1251	0.0193	98.2315
7	2015-03-01	HB4_cpx4_7	51.86	0.7103	3.21	7.66	0.1959	14.98	19.25	0.2589	0.1037	0.0187	98.2475
8	2015-03-01	HB4_cpx4_8	51.98	0.7004	3.01	7.48	0.2168	15.15	19.21	0.22	0.1451	0.0202	98.1325
9	2015-03-01	HB4_cpx4_9	51.74	0.8382	2.73	8.75	0.2478	14.7	18.44	0.2061	0.0586	0.0334	97.7441
10	2015-03-01	HB4_cpx4_10	52.61	0.6809	1.96	8.96	0.2445	14.72	18.95	0.2065	0.0319	0	98.3638
1	2015-03-01	HB4_cpx5_1	51.21	0.9339	4.17	6.75	0.1445	15.51	20.25	0.2812	0.2464	0.0112	99.5072
2	2015-03-01	HB4_cpx5_2	51.57	0.7581	3.94	7.05	0.1755	16.2	18.89	0.2511	0.2635	0.0267	99.1249
3	2015-03-01	HB4_cpx5_3	52.44	0.626	2.99	6.59	0.1814	16.37	19.89	0.2175	0.2582	0.0185	99.5816
4	2015-03-01	HB4_cpx5_4	51.36	0.9338	3.84	7.18	0.1737	15.4	20.25	0.2573	0.1237	0.0363	99.5548
5	2015-03-01	HB4_cpx5_5	51.87	0.8544	3.68	7.54	0.2017	15.95	19.16	0.2332	0.1264	0.0107	99.6264
6	2015-03-01	HB4_cpx5_6	51.92	0.8417	3.61	7.31	0.172	15.99	19.43	0.2638	0.1555	0.0233	99.7163
7	2015-03-01	HB4_cpx5_7	51.31	1.0167	3.98	7.85	0.1973	15.64	19.46	0.2451	0.1082	0.008	99.8153
8	2015-03-01	HB4_cpx5_8	52.2	0.7175	3.21	6.93	0.1845	16.11	19.81	0.2329	0.1965	0.0171	99.6085
9	2015-03-01	HB4_cpx5_9	51.48	0.7919	3.4	7.38	0.1813	16	19.52	0.24	0.1383	0.0279	99.1594
10	2015-03-01	HB4_cpx5_10	52.13	0.6731	3.05	7.1	0.1711	16.26	19.4	0.2017	0.1679	0.0199	99.1737
11	2015-03-01	HB4_cpx5_11	52.36	0.659	3	7.21	0.1948	16.2	19.45	0.2331	0.1476	0.015	99.4695
12	2015-03-01	HB4_cpx5_12	51.75	0.7411	3.26	7.73	0.1982	16.05	19.1	0.2311	0.0717	0.0231	99.1552
13	2015-03-01	HB4_cpx5_13	52.35	0.7788	2.65	8.75	0.2219	15.82	18.73	0.224	0.0477	0.0104	99.5828
14	2015-03-01	HB4_cpx5_14	52.65	0.7722	2.3	9.42	0.2529	15.59	18.57	0.2165	0.0398	0.0196	99.831
1	2015-03-01	HB4_cpx6_1	51.07	1.0058	4.54	7.28	0.167	15.92	19.03	0.2559	0.3763	0	99.645
2	2015-03-01	HB4_cpx6_2	51.53	0.8144	4.11	6.96	0.1749	16.06	19.37	0.2452	0.2924	0.021	99.5779
3	2015-03-01	HB4_cpx6_3	52.21	0.6746	3.38	6.67	0.1621	16.33	19.83	0.2269	0.2868	0.0068	99.7772
4	2015-03-01	HB4_cpx6_4	51.6	0.904	4	7.14	0.17	15.86	19.65	0.2644	0.2364	0	99.8248
5	2015-03-01	HB4_cpx6_5	52.72	0.6239	3.08	6.61	0.1783	16.41	19.89	0.2289	0.2809	0.0158	100.038
6	2015-03-01	HB4_cpx6_6	52.35	0.6471	3.23	6.87	0.1593	16.29	19.41	0.2426	0.2078	0.0275	99.4343
7	2015-03-01	HB4_cpx6_7	51.95	0.7496	3.18	7.09	0.1991	15.93	20.14	0.2378	0.1357	0.0059	99.6181
8	2015-03-01	HB4_cpx6_8	52.05	0.7484	3.01	7.14	0.1801	15.79	20.33	0.2453	0.1334	0.0222	99.6494
9	2015-03-01	HB4_cpx6_9	52.03	0.7942	3.14	7.26	0.1809	15.63	20.19	0.2474	0.1068	0.0258	99.6051
10	2015-03-01	HB4_cpx6_10	52.87	0.6009	2.73	7.15	0.1914	16.56	19.61	0.2208	0.1487	0.01	100.092
11	2015-03-01	HB4_cpx6_11	52	0.7548	3.19	7.16	0.1916	15.42	20.22	0.2318	0.1148	0.0121	99.2951
12	2015-03-01	HB4_cpx6_12	51.54	0.9043	3.5	8.01	0.2047	15.38	19.82	0.2403	0.0853	0.0226	99.7072
13	2015-03-01	HB4_cpx6_13	52.93	0.7118	2.06	8.86	0.2399	15.34	19.19	0.2013	0.0468		99.5828
	2014-10-01	HB9_cpx1_b_1	50.24	0.879	4.22	7.53	0.1695	16.23	19.23	0.2703	0.3367		99.1055
	2014-10-01	HB9_cpx1_b_2	50.93	0.7511	3.41	7.16	0.1787	16.02	20.33	0.2096	0.2024		99.1918
	2014-10-01	HB9_cpx1_b_3	50.46	0.8899	3.76	7.81	0.1826	15.82	19.79	0.2537	0.1183		99.0845
	2014-10-01	HB9_cpx1_b_4	51.16	0.7266	3.29	7.52	0.168	16.03	20.2	0.2239	0.1635		99.482
	2014-10-01	HB9_cpx3_b_1	50.57	0.6926	4.11	7.52	0.1744	16.12	19.31	0.2956	0.3201		99.1127
	2014-10-01	HB9_cpx3_b_2	51.18	0.6565	3.56	7.2	0.1872	16.21	19.91	0.208	0.2498		99.3615
	2014-10-01	HB9_cpx3_b_3	50.86	0.7621	3.81	7.79	0.1818	15.98	19.62	0.2648	0.1869		99.4556
	2014-10-01	HB9_cpx3_b_4	51.44	0.6124	2.94	7.32	0.1923	16.1	20.13	0.2185	0.1584		99.1116
	2014-10-01	HB9_cpx3_b_5	51.18	0.8359	3.15	8.42	0.2049	15.85	19.38	0.1974	0.104		99.3222
	2014-10-01	HB9_cpx3_b_6	51.48	0.8517	2.5	9.33	0.246	15.53	19.26	0.2153	0.054		99.467
	2014-10-01	HB9_cpx4_b_1	50.47	0.893	4.21	7.4	0.1829	15.96	19.92	0.2909	0.2811		99.6079
	2014-10-01	HB9_cpx4_b_2	51.13	0.6671	3.32	7.51	0.1781	16.37	20.05	0.2023	0.1489		99.5764
	2014-10-01	HB9_cpx5_1	50.52	0.8262	4.31	7.86	0.1861	16.63	18.44	0.2648	0.396		99.4331
	2014-10-01	HB9_cpx5_2	50.94	0.6755	3.11	7.36	0.1736	16.09	19.96	0.2329	0.1789		98.7209
	2014-10-01	HB9_cpx5_3	51.15	0.771	3.37	8.18	0.1886	15.96	19.45	0.2449	0.0484		99.3629
	2014-10-01	HB9_cpx5_4	51.61	0.6299	3.04	7.61	0.1831	16.24	19.75	0.2561	0.1008		99.4199
	2014-10-01	HB9_cpx5_5	51.07	0.6718	3.14	7.07	0.1575	15.82	20.51	0.2475	0.1594		98.8462
	2014-10-01	HB9_cpx6_1	50.29	0.8197	3.91	7.46	0.1409	16.13	19.4	0.2721	0.3416		98.7643
	2014-10-01	HB9_cpx6_2	50.25	1.0497	4.09	8.26	0.2061	15.46	19.69	0.2376	0.094		99.3374
	2014-10-01	HB9_cpx7_1	50.94	0.7064	3.45	7.14	0.1929	15.56	20.53	0.2431	0.218		98.9804
	2014-10-01	HB9_cpx7_2	51.24	0.7238	2.15	9.42	0.2142	15.76	18.59	0.2042	0.0456		98.3478
	2014-10-01	HB9_cpx8_1	49.85	0.9525	4.31	7.37	0.1626	15.9	19.51	0.2455	0.3242		98.6248
	2014-10-01	HB9_cpx8_2	51.13	0.6911	3.3	7.1	0.1594	16.17	20.12	0.2295	0.189		99.089
	2014-10-01	HB9_cpx8_3	49.69	1.0978	4.44	8.17	0.1633	15.74	19.07	0.2682	0.1184		98.7577
	2014-10-01	HB9_cpx8_4	51.27	0.6664	3.16	7.26	0.1791	16.2	20.07	0.238	0.1972		99.2407
	2014-10-01	HB9_cpx8_5	52.08	0.6315	1.94	8.81	0.2264	15.96	19.53	0.2213	0.0555		99.4547
	2014-10-01	HB9_cpx9_1	50.3	0.8673	4.02	7.47	0.2175	16.04	19.54	0.2748	0.3095		99.0391
	2014-10-01	HB9_cpx9_2	51.02	0.7574	3.55	6.86	0.1956	16.04	20.36	0.2556	0.2921		99.3307
	2014-10-01	HB9_cpx9_3	51.12	0.7528	3.27	7.25	0.151	16.14	20.04	0.2248	0.1802		99.1288
	2014-10-01	HB9_cpx9_4	51.27	0.8521	2.84	8.5	0.1845	16.09	19.2	0.2067	0.0775		99.2208
	2014-10-01	HB9_cpx10_1	50.64	0.7099	3.89	7.23	0.1715	16.15	19.92	0.2374	0.2731		99.2219
	2014-10-01	HB9_cpx10_2	49.93	0.919	4.11	8.13	0.1704	15.4	20.23	0.2423	0.0909		99.2226
	2014-10-01	HB9_cpx10_3	50.85	0.7527	3.39	7.41	0.1752	15.61	20.73	0.2282	0.1669		99.313
	2014-10-01	HB9_cpx10_4	48.82	1.4986	3.81	13.31	0.3125	13.49	17.36	0.2805	0.0163		98.8979
	2014-10-01	HB9_cpx10_5	51.95	0.6074	1.8125	8.93	0.2132	16.18	19.42	0.1974	0.0391		99.3496
	2014-10-01	HB9_cpx11_1	50.78	0.6787	3.95	7.46	0.208	16.3	19.29	0.232	0.3604		99.2591
	2014-10-01	HB9_cpx11_2	50.73	0.7003	3.98	7.44	0.1728	16.32	19.21	0.267	0.3101		99.1302
	2014-10-01	HB9_cpx11_3	51.71	0.6916	2.11	9.06	0.2194	15.96	19.32	0.2586	0.0541		99.3837
	2015-01-01	HB6_cpx1_1	51.39	0.6611	2.88	7.27	0.2017	16.23	20.3	0.2664	0.1711		99.3703
	2015-01-01	HB6_cpx1_2	50.63	1.016	2.97	10.74	0.2566	14.72	18.66	0.2533	0.0131		99.259
	2015-01-01	HB6_cpx1_3	51.64	0.6513	2.1	9.18	0.2054	15.44	19.65	0.2011	0.0233		99.0911
	2015-01-01	HB6_cpx2_1	50.81	0.7265	4.09	7.51	0.1581	15.69	19.56	0.2447	0.2874		99.0767
	2015-01-01	HB6_cpx2_2	50.66	0.7819	3.74	8.14	0.1654	15.41	19.75	0.2623	0.0978		99.0074
	2015-01-01	HB6_cpx2_3	50.95	0.7305	3.63	7.6	0.1512	15.55	20.03	0.2523	0.1461		99.0401
	2015-01-01	HB6_cpx2_4	51.37	0.6649	3.27	7.57	0.1991	15.61	20.44	0.2354	0.136		99.4954
	2015-01-01	HB6_cpx2_5	51.08	0.4627	1.3724	8.83	0.2158	16.06	17.95	0.188	0.0309		96.1898
	2015-01-01	HB6_cpx3_1	50.82	0.6205	4.16	7.76	0.1925	16.2	19.13	0.3103	0.3417		99.535
	2015-01-01	HB6_cpx3_2	50.79	0.6801	3.89	7.41	0.1669	15.82	19.85	0.2168	0.2347		99.0585
	2015-01-01	HB6_cpx3_3	51.19	0.6129	3.27	7.16	0.1681	15.91	20.4	0.2601	0.225		99.1961
	2015-01-01	HB6_cpx3_4	51.85	0.6339	2.64	8.19	0.1788	15.96	19.6	0.1996	0.0909		99.3432
	2015-01-01	HB6_cpx4_1	50.46	1.0034	3.92	8.18	0.183	15.08	20.05	0.2489	0.1337		99.259
	2015-01-01	HB6_cpx4_2	51.28	0.8267	2.9	8.68	0.217	15.62	19.21	0.2028	0.0882		99.0247
	2015-01-01	HB6_cpx5_1	50.66	0.8337	4.26	7.72	0.1712	15.84	19.35	0.2555	0.2958		99.3862
	2015-01-01	HB6_cpx5_2	50.27	1.2016	3.77	9.94	0.2157	14.83	18.53	0.2254	0.0616		99.0443
	2015-01-01	HB6_cpx6_1	51.28	0.6791	3.38	7.88	0.1966	15.77	20	0.252	0.1246		99.5623
	2015-01-01	HB6_cpx6_2	51.33	0.7641	2.15	11.33	0.2761	14.8	18.63	0.2553	0.0162		99.5517
	2015-01-01	HB6_cpx6_3	52.04	0.6991	2.22	9.15	0.2109	15.63	19.79	0.2241	0.0398		100.004
	2015-01-01	HB6_cpx7_1	50.76	0.7683	4.09	7.37	0.1447	15.58	20.06	0.1944	0.2287		99.1961
	2015-01-01	HB6_cpx7_2	51.52	0.5954	3.18	7.04	0.1807	16.27	20.48	0.2592	0.2085		99.7338
	2015-01-01	HB6_cpx7_3	50.62	0.8716	3.98	8.05	0.2122	15.49	19.98	0.2304	0.1072		99.5414
	2015-01-01	HB6_cpx7_4	51.49	0.6109	3.01	7.31	0.1892	16.14	20.27	0.2073	0.1345		99.3619
	2015-01-01	HB6_cpx7_5	51.15	0.8232	2.68	10.56	0.2409	15.23	18.68	0.219	0.0297		99.6128
	2015-01-01	HB6_cpx8_1	50.24	0.9155	3.74	8.37	0.2078	15.61	19.19	0.2267	0.1058		98.6058
	2015-01-01	HB6_cpx8_2	50.43	0.7674	3.81	8.35	0.2105	15.54	19.59	0.2407	0.0913		99.0299
	2015-01-01	HB6_cpx9_1	50.54	0.8931	4.22	7.61	0.1813	15.62	19.99	0.2538	0.3184		99.6266
	2015-01-01	HB6_cpx9_2	50.96	0.8366	3.57	8.47	0.2202	15.88	19.54	0.2235	0.0706		99.7709
	2015-01-01	HB6_cpx10_1	50.36	0.712	3.81	7.09	0.1625	15.71	19.7	0.2252	0.2657		98.0354
	2015-01-01	HB6_cpx10_2	51.47	0.6475	3.1	7.41	0.1702	15.6	20.87	0.2039	0.1254		99.597
	2015-01-01	HB6_cpx10_3	51.26	0.6342	3.45	7.34	0.1661	15.9	20.42	0.2382	0.2009		99.6094
	2015-01-01	HB6_cpx10_4	50.6	1.0014	3.91	9.5	0.215	15.2	18.93	0.2581	0.0419		99.6564
	2015-01-01	HB6_cpx10_5	52.18	0.6205	2.08	8.65	0.2181	15.88	19.9	0.215	0.032		99.7756
	2015-01-01	HB6_cpx10_6	48.45	1.4634	4.26	14.42	0.2761	12.32	17.83	0.3321	0.0198		99.3714
	2015-03-01	HB4_cpx1_1	49.56	1.0466	4.57	7.89	0.1959	15.46	19.28	0.2587	0.2601		98.5213
	2015-03-01	HB4_cpx1_2	50.94	0.6656	3.39	7.34	0.187	16.09	19.89	0.2217	0.1907		98.915
	2015-03-01	HB4_cpx1_3	50.8	0.7102	3.55	7.72	0.1736	15.89	19.72	0.206	0.1788		98.9486
	2015-03-01	HB4_cpx1_4	50.95	0.6168	3.16	7.28	0.179	15.81	20.13	0.2621	0.1656		98.5535
	2015-03-01	HB4_cpx2_1	50.35	0.842	4.26	7.68	0.1477	15.72	19.64	0.225	0.201		99.0657
	2015-03-01	HB4_cpx2_2	51.2	0.6205	3.48	7.45	0.178	16.46	19.25	0.2281	0.27		99.1366
	2015-03-01	HB4_cpx2_3	50.93	0.7496	3.62	8.71	0.2536	16.22	18.56	0.2411	0.0708		99.3551
	2015-03-01	HB4_cpx2_4	51.38	0.6784	3.44	8.04	0.1722	16.66	18.88	0.231	0.1778		99.6594
	2015-03-01	HB4_cpx2_5	51.82	0.7321	2.08	10.07	0.2392	15.17	18.99	0.2362	0.0167		99.3542
	2015-03-01	HB4_cpx3_1	50.53	0.8703	3.91	7.66	0.1749	15.37	19.44	0.2441	0.2509		98.4502
	2015-03-01	HB4_cpx3_2	51.11	0.7614	3.11	7.14	0.1512	14.93	20.87	0.2061	0.1899		98.4686
	2015-03-01	HB4_cpx3_3	52.02	0.5934	1.7012	9.67	0.2232	15.82	18.31	0.2132	0.0426		98.5936
	2015-03-01	HB4_cpx4_1	50.67	0.8627	4.12	7.53	0.1652	15.15	19.81	0.2764	0.2582		98.8425
	2015-03-01	HB4_cpx4_2	51.16	0.7006	3.23	7.14	0.1831	15.13	20.83	0.2422	0.1733		98.7892
	2015-03-01	HB4_cpx4_3	51.08	0.7136	3.32	7.54	0.1627	15.66	19.88	0.2442	0.1598		98.7603
	2015-03-01	HB4_cpx5_1	50.5	0.843	3.69	8.45	0.2017	14.83	19.4	0.2718	0.1017		98.2882
	2015-03-01	HB4_cpx5_2	50.73	0.7881	3.42	8.14	0.1398	14.85	19.96	0.2623	0.0866		98.3768
	2015-03-01	HB4_cpx6_1	50.85	0.7406	4.03	7.26	0.1762	14.79	20.54	0.2862	0.2637		98.9367
	2015-03-01	HB4_cpx6_2	51.24	0.7269	3.38	7.22	0.1927	15.18	20.57	0.2683	0.1697		98.9476
	2015-03-01	HB4_cpx7_1	50.48	0.8822	4.26	7.38	0.2027	15.35	19.63	0.2393	0.2585		98.6827
	2015-03-01	HB4_cpx7_2	51.15	0.8888	3.53	7.9	0.1838	15.52	19.81	0.2346	0.1408		99.358
	2015-03-01	HB4_cpx8_1	50.59	0.8857	3.89	7.4	0.2016	15.17	20	0.2263	0.2313		98.5949
	2015-03-01	HB4_cpx8_2	51.21	0.6589	3.12	7	0.1591	15.53	20.48	0.2205	0.1856		98.5641
	2015-03-01	HB4_cpx8_3	50.63	0.8641	3.68	8.13	0.1985	15.25	19.56	0.2279	0.1391		98.6796
	2015-03-01	HB4_cpx9_1	50.38	0.9994	3.81	7.79	0.1389	14.65	20.43	0.2311	0.1224		98.5518
	2015-03-01	HB4_cpx9_2	51.56	0.6911	2.96	7.21	0.1782	15.24	20.64	0.2254	0.1729		98.8776
	2015-03-01	HB4_cpx10_1	52.95	0.4177	1.7264	7.76	0.2162	18.25	17.38	0.1775	0.1925		99.0703
	2015-03-01	HB4_cpx10_2	50.71	0.7953	4.25	7.17	0.1801	15.01	20.66	0.2767	0.3224		99.3745
	2015-03-01	HB4_cpx10_3	50.98	0.7216	4.01	7.7	0.2027	15.69	19.48	0.2288	0.1244		99.1375
	2015-03-01	HB4_cpx10_4	51.11	0.7099	3.85	7.7	0.2081	15.54	19.69	0.2628	0.1112		99.182
	2015-03-01	HB4_cpx10_5	51.7	0.5839	3.24	6.91	0.1936	15.72	20.29	0.2158	0.1476		99.0009
	2015-03-01	HB4_cpx10_6	50.8	0.7729	3.78	8.29	0.2077	15.12	19.64	0.2479	0.05		98.9085
	2015-03-01	HB4_cpx10_7	50.96	0.7721	3.6	8.41	0.2215	15.02	19.76	0.2663	0.0616		99.0715
	2014-12-01	HB7_CPX1_1	51.13	0.6601	3.19	7.04	0.1972	16.31	20.04	0.257	0.1793		99.0036
	2014-12-01	HB7_CPX1_2	50.39	0.8242	3.77	7.8	0.2083	15.59	19.75	0.2789	0.0789		98.6903
	2014-12-01	HB7_CPX1_3	50.81	0.714	3.12	7.53	0.1731	15.81	19.89	0.2655	0.0906		98.4032
	2014-12-01	HB7_CPX1_4	51.15	0.6034	3.02	7.19	0.1554	16	19.98	0.2691	0.1213		98.4892
	2014-12-01	HB7_CPX1_5	51.47	0.689	2.24	8.64	0.2169	15.38	19.45	0.2031	0.0436		98.3326
	2014-12-01	HB7_CPX1_6	49.15	0.9001	2.47	10.94	0.2879	14.23	17.8	0.2295	0.0358		96.0433
	2014-12-01	HB7_CPX1_7	52.58	0.5283	1.6234	9.11	0.233	16.29	18.46	0.2309	0.0009		99.0565
	2014-12-01	HB7_CPX2_1	49.88	0.8626	3.77	7.95	0.1778	15.84	18.52	0.2718	0.1581		97.4303
	2014-12-01	HB7_CPX2_2	51.12	0.6442	3.08	6.96	0.1772	16.03	19.95	0.2371	0.2072		98.4057
	2014-12-01	HB7_CPX3_1	50.81	0.6337	3.76	7.44	0.187	16.45	18.56	0.2494	0.2884		98.3785
	2014-12-01	HB7_CPX3_2	51.04	0.5935	2.92	7.08	0.1848	15.91	19.92	0.2324	0.1854		98.0661
	2014-12-01	HB7_CPX4_1	51.25	0.5924	2.95	7.14	0.1835	16.1	19.92	0.2322	0.1786		98.5467
	2014-12-01	HB7_CPX4_2	50.36	0.8285	3.42	8.16	0.1926	15.76	19.17	0.2643	0.1221		98.2775
	2014-12-01	HB7_CPX5_1	49.74	0.8162	3.79	7.3	0.1722	15.43	19.42	0.2484	0.2566		97.1734
	2014-12-01	HB7_CPX5_2	50.32	0.775	3.3	7.21	0.1896	15.54	19.73	0.2515	0.2166		97.5327
	2014-12-01	HB7_CPX5_3	50.84	0.7406	3.27	7.49	0.1717	15.87	19.89	0.2053	0.1284		98.606
	2014-12-01	HB7_CPX6_1	49.94	0.8072	3.46	7.66	0.2186	15.15	20.18	0.2104	0.0911		97.7173
	2014-12-01	HB7_CPX6_2	51.04	0.691	3.11	7.8	0.1831	15.69	19.67	0.2042	0.0918		98.4801
	2014-12-01	HB7_CPX6_3	51.87	0.599	1.7963	9	0.2392	15.54	19.45	0.2208	0.0225		98.7378
	2014-12-01	HB7_CPX7_1	50.24	0.7165	3.96	7.37	0.2156	15.67	19.65	0.2609	0.2335		98.3165
	2014-12-01	HB7_CPX7_2	51.14	0.6285	3.14	6.6	0.1906	15.92	20.18	0.2257	0.2358		98.2606
	2014-12-01	HB7_CPX7_3	50.57	0.7553	3.65	7.03	0.1955	15.46	19.95	0.2718	0.1735		98.0561
	2014-12-01	HB7_CPX7_4	51.6	0.6192	1.93	8.79	0.2671	16	18.67	0.2271	0.0529		98.1563
	2014-12-01	HB7_CPX7_5	50.96	0.6781	3.32	7.6	0.2204	16.64	18.55	0.2662	0.131		98.3657
	2014-12-01	HB7_CPX8_1	52.51	0.3917	1.8013	7.06	0.2142	18.22	17.8	0.2106	0.1921		98.3999
	2014-12-01	HB7_CPX8_2	50.08	0.9413	3.8	7.15	0.1893	15.48	20.18	0.2262	0.1978		98.2446
	2014-12-01	HB7_CPX8_3	50.15	0.8172	3.58	6.79	0.1765	15.68	20.3	0.22	0.2145		97.9282
	2014-12-01	HB7_CPX8_4	49.77	1.0184	4.09	7.61	0.1966	15.15	19.93	0.2493	0.0802		98.0945
	2014-12-01	HB7_CPX8_5	50.53	0.8023	3.4	7.01	0.1762	15.8	20.16	0.2303	0.1259		98.2347
	2014-12-01	HB7_CPX8_6	50.38	0.7434	3.09	7.33	0.1641	15.72	20.28	0.2526	0.0669		98.027
	2014-12-01	HB7_CPX8_7	51.14	0.5954	2.69	6.82	0.2069	15.97	20.54	0.2098	0.1053		98.2774
	2014-12-01	HB7_CPX8_8	51.31	0.6796	2.04	8.77	0.25	15.38	19.47	0.2309	0.0368		98.1673
	2014-12-01	HB7_CPX9_1	50.17	0.8371	3.91	6.75	0.1663	15.91	20.04	0.2841	0.2404		98.3079
	2014-12-01	HB7_CPX9_2	51.02	0.6352	3.16	6.55	0.1776	15.82	20.11	0.2342	0.1851		97.8921
	2014-12-01	HB7_CPX9_3	51.63	0.6486	2.02	8.57	0.2304	15.36	19.25	0.2251	0.0282		97.9623
	2014-12-01	HB7_CPX10_1	50.86	0.6457	3.61	6.8	0.1543	16.08	18.96	0.2557	0.2155		97.5812
	2014-12-01	HB7_CPX10_2	51.46	0.6373	1.94	8.55	0.2351	15.43	19.24	0.2002	0.0753		97.7679
	2015-01-01	HB8_CPX1_1	49.89	0.8844	3.82	8.28	0.1936	16.1	19.18	0.2171	0.151		98.7161
	2015-01-01	HB8_CPX1_2	50.58	0.6727	3.14	7.45	0.2005	16.34	20	0.1979	0.2011		98.7822
	2015-01-01	HB8_CPX2_1	48.35	0.7771	3.54	7.8	0.1757	16.21	18.88	0.2483	0.1902		96.1713
	2015-01-01	HB8_CPX2_2	50.48	0.6413	3.03	7.31	0.1605	16.39	19.86	0.2109	0.1973		98.28
	2015-01-01	HB8_CPX2_3	50.63	0.6549	2.05	9.08	0.2285	15.88	19.25	0.1783	0.077		98.0287
	2015-01-01	HB8_CPX3_1	50.32	0.6535	3.87	7.63	0.1924	16.32	19.11	0.2402	0.2718		98.6079
	2015-01-01	HB8_CPX3_2	49.96	0.7746	3.73	7.98	0.2163	15.79	19.55	0.2362	0.1334		98.3705
	2015-01-01	HB8_CPX3_3	50.38	0.6705	3.04	7.3	0.1413	16.23	19.89	0.2191	0.1826		98.0535
	2015-01-01	HB8_CPX3_4	50.54	0.6564	3.01	7.46	0.2167	16.25	19.77	0.2014	0.1523		98.2568
	2015-01-01	HB8_CPX3_5	50.69	0.6277	1.97	9.02	0.2323	16.1	19.03	0.2132	0.034		97.9172
	2015-01-01	HB8_CPX4_1	49.05	0.8392	3.73	7.6	0.2027	16.05	19.31	0.2087	0.2636		97.2542
	2015-01-01	HB8_CPX4_2	49.45	0.7207	3.92	7.36	0.1838	15.83	19.79	0.2527	0.2771		97.7843
	2015-01-01	HB8_CPX4_3	48.7	0.8269	3.86	7.77	0.2094	16	19.24	0.2491	0.1986		97.054
	2015-01-01	HB8_CPX4_4	49.65	0.7146	3.89	7.51	0.1817	15.81	19.73	0.2612	0.26		98.0075
	2015-01-01	HB8_CPX4_5	49.83	0.707	3.66	7.77	0.2018	16.05	19.34	0.229	0.1563		97.9441
	2015-01-01	HB8_CPX4_6	50.36	0.6136	3.13	7.3	0.1806	16.22	19.89	0.207	0.2094		98.1106
	2015-01-01	HB8_CPX5_1	50.15	0.7477	3.43	7.37	0.1531	15.66	20.37	0.2161	0.1326		98.2295
	2015-01-01	HB8_CPX5_2	49.26	0.7951	3.82	8.16	0.1838	15.44	19.57	0.2787	0.1016		97.6092
	2015-01-01	HB8_CPX5_3	50.26	0.6535	3.15	7.36	0.1843	15.69	20.21	0.2275	0.1292		97.8645
	2015-01-01	HB8_CPX5_4	50.95	0.6632	1.97	9.14	0.2504	15.78	19.2	0.207	0.0734		98.234
	2015-01-01	HB8_CPX6_1	50.21	0.8296	3.93	7.19	0.1869	15.7	20.23	0.2334	0.2241		98.734
	2015-01-01	HB8_CPX6_2	50.61	0.7032	3.28	7.36	0.1761	16.38	19.7	0.2259	0.2074		98.6426
	2015-01-01	HB8_CPX6_3	50.57	0.7709	3.32	7.79	0.2131	16.18	19.52	0.2392	0.1379		98.7411
	2015-01-01	HB8_CPX6_4	51.47	0.6975	2.12	9.25	0.2329	15.9	19.05	0.2335	0.0749		99.0288
	2015-01-01	HB8_CPX6_5	50.54	0.9541	2.62	10.07	0.2122	14.98	18.79	0.2243	0.0593		98.4499
	2015-01-01	HB8_CPX7_1	50.14	0.7707	4.04	7.26	0.1949	15.65	20.11	0.2566	0.2791		98.7013
	2015-01-01	HB8_CPX7_2	50.67	0.7893	3.63	7.57	0.157	15.69	20.34	0.2296	0.1856		99.2615
	2015-01-01	HB8_CPX7_3	51.1	0.6647	2.97	6.7	0.1862	15.86	21	0.2375	0.2079		98.9263
	2015-01-01	HB8_CPX7_4	50.57	0.7899	3.43	7.3	0.1571	15.55	20.73	0.2097	0.1323		98.869
	2015-01-01	HB8_CPX7_5	50.76	0.7179	3.17	7.24	0.1901	15.68	20.8	0.2436	0.1476		98.9492
	2015-01-01	HB8_CPX7_6	50.6	0.7993	3.73	7.71	0.1591	15.35	20.43	0.2212	0.1026		99.1022
	2015-01-01	HB8_CPX7_7	51.65	0.6928	2.75	8.94	0.2333	16.59	17.96	0.2339	0.0881		99.1381
	2015-01-01	HB8_CPX8_1	50.56	0.8667	3.79	7.97	0.1921	16.44	18.63	0.2532	0.3001		99.0021
	2015-01-01	HB8_CPX8_2	50.41	0.8935	4.04	7.45	0.1813	15.91	19.68	0.2479	0.2819		99.0946
	2015-01-01	HB8_CPX8_3	51.33	0.6272	3.02	7.3	0.158	16.53	19.81	0.2166	0.2252		99.217
	2015-01-01	HB8_CPX8_4	51.66	0.6627	2.09	8.92	0.222	15.79	19.52	0.2072	0.0619		99.1338
	2015-01-01	HB8_CPX9_1	50.32	0.8097	3.57	7.3	0.1669	16.01	20.07	0.2494	0.2358		98.7318
	2015-01-01	HB8_CPX9_2	50.56	0.7939	3.07	7.78	0.1918	15.8	20.34	0.2112	0.1096		98.8565
	2015-01-01	HB8_CPX10_1	50.61	0.6436	3.81	7.42	0.2024	16.4	19.23	0.268	0.2732		98.8572
	2015-01-01	HB8_CPX10_2	50.61	0.7828	3.76	7.87	0.1805	15.9	19.66	0.2644	0.1138		99.1415
	2015-01-01	HB8_CPX10_3	51.15	0.6243	3.12	7.04	0.1714	15.75	20.1	0.2275	0.1558		98.339

## Sheet: CPX_TE_spots_Table2
Table 2: LA-ICP-MS analyses of clinopyroxenes
			Li			Be			P			S			Cl			Ca			Sc			Ti			V			Cr			Mn			Co			Ni			Cu			Ga			Rb
Cpx ID	Eruption period	Spot diameter (micron)	Concentration (ppm)	2 SE	Detection limit	Concentration (ppm)	2 SE	Detection limit	Concentration (ppm)	2 SE	Detection limit	Concentration (ppm)	2 SE	Detection limit	Concentration (ppm)	2 SE	Detection limit	Concentration (ppm)	2 SE	Detection limit	Concentration (ppm)	2 SE	Detection limit	Concentration (ppm)	2 SE	Detection limit	Concentration (ppm)	2 SE	Detection limit	Concentration (ppm)	2 SE	Detection limit	Concentration (ppm)	2 SE	Detection limit	Concentration (ppm)	2 SE	Detection limit	Concentration (ppm)	2 SE	Detection limit	Concentration (ppm)	2 SE	Detection limit	Concentration (ppm)	2 SE	Detection limit	Concentration (ppm)	2 SE
Cpx_1	2014-10-01	25	1.9	1.2	1.2			0.27	93	27	29	582	68	22	510	410	430	153000	24000	180	123	22	0.73	4780	540	3.8	598	53	0.5	287	25	4.6	1917	81	3	56.3	4.8	0.53	114	24	1.3	11	3	0.99	5.9	2	0.37	0.3	0.68
Cpx_1	2014-10-01	25			0.86			0.12	44.5	8.7	22	677	15	24			380	139300	3000	170	149.2	3.6	0.63	4112	67	3.3	406.7	6.7	0.37	1741	28	3.4	1456	17	2.9	51	1.2	0.46	184.3	5.4	0.99	4.88	0.88	1.1	7.36	0.38	0.36
Cpx_2	2014-10-01	25			0.89			0.23	34	30	28	561	41	22			300	110700	4200	170	97.4	4	0.68	2410	160	2.9	242	18	0.31	412	35	3.6	2182	92	2.4	64	3.1	0.47	170	13	1.1	5.8	1.9	0.76	3.45	0.7	0.33
Cpx_2	2014-10-01	25			0.98			0.12			25	591	35	20			270	144900	5400	160	138	4.2	0.71	3880	150	3.5	396	16	0.31	810	36	3.3	1644	28	1.7	52.6	2.3	0.38	153.2	8.3	1	5.2	2.3	0.87	6.5	0.65	0.35
Cpx_2	2014-10-01	25	0.98	0.99	0.82			0.32	36	38	24	581	53	25	630	220	360	144700	4900	150	143.7	3.6	0.59	5370	190	3.4	469	25	0.35	607	38	3.5	1905	13	2.6	58.7	4.5	0.37	151	18	1.2	11.6	5.2	0.96	6.5	1.3	0.33
Cpx_2	2014-10-01	25			0.81			0.21	50	17	23	624	28	21			280	143500	6100	140	125.1	4.3	0.68	4526	87	3.2	516	11	0.36	435	58	3.7	1963	48	2.2	60.8	2.4	0.39	135.1	5.3	0.97	4.58	0.84	0.7	5.9	0.75	0.29
Cpx_3	2014-10-01	25	2.5	1	0.96			0.22			28	577	54	25	430	340	330	123300	4200	170	110.3	5.5	0.59	2190	150	3.7	227	15	0.33	995	41	3.7	1966	53	2.2	58.6	3.4	0.39	183	14	1.2	8.1	1.6	0.91	3.21	0.66	0.22
Cpx_3	2014-10-01	25	1.12	0.46	0.76			0.23	42	11	27	667	16	18			280	137600	3100	150	145.1	3.9	0.67	4110	120	3.8	414.5	9	0.41	1545	27	3.7	1472	20	2.4	51.5	1.2	0.38	184.2	5.3	1.1	6.21	0.84	0.61	7.79	0.55	0.31
Cpx_3	2014-10-01	25	1.18	0.42	0.65			0.12	30	12	21	628	16	22			290	138000	3300	130	122.1	3.3	0.65	3488	93	2.7	555	12	0.3	434	10	3.5	1706	20	2.8	56.9	1.2	0.42	133.1	3.6	0.97	4.12	0.65	1	5.31	0.35	0.26
Cpx_3	2014-10-01	25			0.88			0.36	29.7	9.4	22	661	18	18			340	139600	3600	160	135.7	3.2	0.53	3666	71	2.5	394.8	5.8	0.29	828	16	2.9	1506	16	2.6	53	1.2	0.42	160.5	4.6	1.1	4.85	0.65	0.81	6.94	0.49	0.27
Cpx_4	2014-10-01	25	1.63	0.67	0.88			0.54	25	13	21	630	25	24			300	123400	4000	180	109.1	3.4	0.56	2648	77	2.8	284.7	8.2	0.32	530	35	3.1	1905	30	2.2	57.6	1.6	0.35	173.6	7.4	0.91	7.7	1.3	0.9	4.1	0.57	0.29
Cpx_4	2014-10-01	25			0.95			0.41	27	11	22	655	17	22			300	140900	4700	150	136.6	4.8	0.63	4460	160	3.5	434.6	7.4	0.37	752	22	3.5	1585	27	1.9	53.3	1.5	0.37	153.7	5.1	0.88	6.39	0.99	0.98	6.9	0.54	0.31
Cpx_5	2014-10-01	25			0.86			0.21			25	682	15	23			360	141400	3300	200	125.5	3.4	0.63	3636	80	2.4	349.7	6.4	0.32	1036	23	4.4	1483	16	2.3	52.2	1.2	0.32	167.2	4.9	0.87	5	1	0.8	6.35	0.43	0.29
Cpx_5	2014-10-01	25	1.93	0.43	0.87			0.22			27	693	20	23			430	144300	3900	210	131.1	3.7	0.65	3949	89	3.5	381.6	7	0.42	1540	39	3.1	1478	15	2.5	50.1	1.3	0.4	179.1	7.3	1.2	6.29	0.99	0.94	5.89	0.47	0.34
Cpx_5	2014-10-01	25	1.99	0.52	1.1			0.25	42	12	23	697	17	30			370	134600	3100	140	142	2.8	0.61	4618	86	3	434.6	7.6	0.41	1414	60	3.6	1591	19	2.7	52.9	1.4	0.41	191.3	5.8	1.2	10.5	1.1	1.3	7.67	0.53	0.29
Cpx_6	2014-10-01	25	0.94	0.56	0.78			0.12	38	14	30	675	18	25			300	121400	1600	160	112.9	2.4	0.64	2857	62	3.1	292.6	6.4	0.37	573	26	3.4	1923	36	2.2	58.2	1.4	0.44	162.1	7.1	0.94	5.6	1.2	0.89	4.4	0.57	0.26
Cpx_6	2014-10-01	25	1.03	0.58	0.99			0.23	35	13	30	705	16	22			370	136900	2500	200	136.3	2.7	0.74	3775	89	3.4	393.7	6.8	0.41	951	23	3.5	1564	20	2.5	54.2	1.4	0.39	168.6	4.8	1.3	4	0.66	1.2	6.94	0.53	0.27
Cpx_6	2014-10-01	25	1.22	0.4	1.1			0.23	29	12	29	714	16	21			360	139100	2300	170	143.5	2.8	0.7	4220	120	3.4	428.7	8.6	0.31	748	19	2.6	1610	20	2.6	55.1	1.3	0.4	161.7	4.3	1.2	4.11	0.86	0.86	8.05	0.47	0.3
Cpx_8	2014-10-01	25	1.07	0.39	0.82			0.12	29	13	28	699	16	23			380	107800	1900	150	88.6	2	0.63	1872	33	3.3	209.5	3.4	0.35	954	17	3.9	1866	23	2.7	59.5	1.3	0.43	197.9	5.3	0.93	4.51	0.61	0.87	3.2	0.36	0.38
Cpx_8	2014-10-01	25	1.47	0.58	0.9			0.26			28	727	19	27			310	139300	3800	210	151.1	5	0.72	4710	190	3.6	431	13	0.38	2014	44	3.7	1532	17	2.4	51	1.4	0.48	182.2	6.3	1.1	4.77	0.8	1.2	7.52	0.49	0.34
Cpx_8	2014-10-01	25	1.76	0.43	0.88			0.31			27	728	15	24			350	136600	3000	160	131.7	3	0.67	3813	70	3.6	374.6	6.8	0.39	1433	66	2.9	1484	15	2.8	52.5	1.3	0.38	178.9	4.6	1.1	9.3	1	0.9	6.25	0.39	0.35
Cpx_1	2015-01-01	25	1.54	0.56	0.86			0.12			24	724	21	20			310	144400	4500	140	161.1	5.4	0.51	5000	190	3.1	443	15	0.39	2174	58	3.3	1551	21	2.9	51.7	1.7	0.39	181.4	5.7	0.77	12.9	1.8	0.91	7.18	0.51	0.34
Cpx_1	2015-01-01	25	1.61	0.4	0.82			0.23	22.9	9.3	22	760	15	24			350	140700	3100	180	154.5	4	0.62	4740	160	3.1	438	12	0.39	1462	50	3	1390	16	2.1	50.9	1.3	0.36	179.7	4.8	1.1	10	1.5	0.81	7.33	0.47	0.28
Cpx_1	2015-01-01	25			1			0.31			26	735	21	17			310	150800	3500	170	136.9	3.5	0.64	4070	120	2.6	383.9	9.9	0.36	1145	27	3.1	1453	18	2.3	49.5	1.3	0.36	163.7	5.7	1.2	4.2	1	1	6.11	0.5	0.29
Cpx_2	2015-01-01	25	1.91	0.39	0.75			0.34			23	710	11	21			260	113500	3000	140	91	2.1	0.54	1975	57	3.1	212.1	5.3	0.32	834	16	3.9	1844	19	2.4	58.2	1.2	0.41	193.1	5.6	0.89	8.29	0.83	0.85	3.29	0.32	0.27
Cpx_2	2015-01-01	25	2.68	0.48	1			0.12			29	726	15	19			280	133200	2500	140	139.5	2.1	0.57	4087	48	3.1	406.2	4.4	0.38	1724	37	3.5	1535	21	2.5	53.1	1.2	0.33	184.3	4.7	1.3	8.97	0.93	0.69	6.98	0.51	0.31
Cpx_3	2015-01-01	25	1.64	0.47	0.83			0.21	23	11	20	713	15	25			370	113800	2400	180	98.2	2.2	0.69	2040	53	2.8	215.6	4.5	0.26	985	14	3.6	1754	20	2.8	57.3	1.4	0.39	192.2	4.7	0.91	5.47	0.81	0.87	3.19	0.28	0.38
Cpx_3	2015-01-01	25	1.78	0.48	0.94			0.2	32	12	25	749	16	23	440	160	330	133800	2000	160	139.8	2.3	0.52	4314	68	3.6	410	5.4	0.31	1620	22	3.2	1451	21	2.3	50.7	1.1	0.31	184.2	5.1	1	8.3	1	0.87	7.23	0.44	0.3
Cpx_3	2015-01-01	25	1.66	0.37	0.69			0.6	25	10	24	752	16	23			330	131000	2900	140	131.6	3.2	0.69	3625	80	3.1	379.8	6.8	0.39	1265	25	3.1	1514	19	2.5	53.3	1.4	0.39	183.6	4.5	0.88	9.5	1.4	0.93	7.12	0.5	0.35
Cpx_4	2015-01-01	25	1.59	0.4	0.77			0.11			20	697	13	20			260	113500	2600	160	92.8	2.3	0.6	2018	50	2.5	217.3	5.1	0.39	868	19	3.3	1822	21	1.8	56.8	1.2	0.34	189.2	4.3	0.92	9	1.5	0.87	3.24	0.26	0.24
Cpx_4	2015-01-01	25	2.11	0.47	0.82			0.12			25	732	15	25			340	133300	2900	170	130.4	3.4	0.5	3949	98	2.9	394	8.5	0.35	1302	28	3.4	1550	23	2.5	54.1	1.5	0.42	185.6	5	1	9.1	0.95	1.1	6.97	0.48	0.26
Cpx_4	2015-01-01	25	2.23	0.59	0.9			0.46	27	14	23	714	16	20			310	136300	3400	150	135.7	3.8	0.59	4250	120	3	404	11	0.3	1690	40	3.8	1572	24	2.3	51.2	1.3	0.36	176.7	5.8	1.1	8.1	1.5	0.85	7.15	0.47	0.24
Cpx_5	2015-01-01	25			0.82			0.12			24	712	21	25			350	141500	3500	140	145.1	3.6	0.59	4342	98	3	402.6	7.3	0.31	1151	43	3.6	1609	24	2.2	53	1.7	0.39	168.2	6.4	1	7.91	0.97	0.85	6.48	0.57	0.28
Cpx_5	2015-01-01	25	1.67	0.52	0.84			0.12	31	16	20	712	18	23	290	130	270	139500	4100	140	142.7	5.7	0.5	3930	210	3	397	18	0.28	1046	40	2.7	1650	32	2.3	52.9	1.4	0.35	161.1	5.8	1.2	7.1	1.1	0.81	6.35	0.7	0.38
Cpx_5	2015-01-01	25	1.48	0.5	0.86			0.23			22	701	22	17			270	143700	4300	160	136.7	4.3	0.66	3720	98	3	380.1	9	0.35	807	21	2.4	1505	20	2.1	52.9	1.3	0.35	154.6	5.9	1	4.69	0.79	0.79	6.13	0.46	0.27
Cpx_6	2015-01-01	25	1.16	0.61	0.75			0.11			24	713	19	22	440	170	350	112800	4000	160	90.3	2.5	0.55	1981	62	2.8	214.6	6	0.31	989	19	3.1	1897	22	2.2	56	1.7	0.34	189.5	7.3	1.1	7.8	1.7	0.89	3.31	0.52	0.23
Cpx_6	2015-01-01	25	1.42	0.42	0.81			0.28	24.8	9.8	24	773	15	24			330	134300	2700	160	128.6	3	0.57	3891	92	2.7	388.2	8	0.37	728	14	2.6	1622	16	2.4	54.5	1.2	0.42	160.2	5	1	9.7	1.1	0.85	6.38	0.32	0.28
Cpx_7	2015-01-01	25	2.54	0.91	0.93			0.34			21	687	24	21			290	127300	4400	170	107.1	3.8	0.57	2560	110	2.9	253.5	9.3	0.35	859	47	3.5	1820	34	2.1	54.1	1.5	0.33	167.2	7.1	1.1	6.3	1.5	1.1	3.72	0.65	0.27
Cpx_8	2015-01-01	25	1.01	0.4	0.85			0.28			25	661	22	23			370	123900	3200	130	106.2	4	0.61	2580	120	3.3	260	12	0.28	1558	84	3.5	1710	46	2	53.6	2	0.4	181.8	8.3	1.1	3.72	0.83	0.88	4.19	0.42	0.32
Cpx_8	2015-01-01	25	0.84	0.44	0.76			0.22			27	676	21	20			290	138200	3000	170	132.8	3.1	0.7	3710	100	3	383.8	8.6	0.35	1729	30	2.7	1490	19	2.4	50.5	1.4	0.34	178.7	4.8	1.4	4.85	0.77	1.1	6.68	0.58	0.3
Cpx_1	2015-02-01	25	2.43	0.86	0.68			0.23	164	57	26	632	23	25			390	135600	3500	170	144	4.2	0.59	5160	240	2.7	442	12	0.43	689	26	3.4	1873	60	2.2	56.8	2.4	0.42	152.7	9.7	1.3	36	12	0.93	7.64	0.84	0.32	1.05	0.41
Cpx_1	2015-02-01	25			1			0.39	37	12	26	654	21	24			330	142200	2600	140	142.2	2.7	0.58	4303	74	2.7	402.4	6.6	0.29	1222	42	3.1	1514	24	2.6	50.7	1.6	0.49	162.8	5.9	1	5.26	0.93	1.1	6.58	0.6	0.33
Cpx_2	2015-02-01	25	1.29	0.44	0.84			0.13	34	15	27	657	18	20			300	134700	3900	170	140.7	4.6	0.75	4250	210	3.8	399	14	0.34	2050	50	3.4	1636	30	2.8	52.2	1.7	0.37	184.2	7.1	1.2	6.7	1.5	0.89	6.31	0.48	0.32
Cpx_2	2015-02-01	25	1.2	0.43	1			0.23	53	11	24	703	15	20			340	133100	2800	180	136.9	2.8	0.67	4120	90	3.5	419.6	7.4	0.38	494	14	3.8	1694	20	2.3	58.5	1.3	0.43	163.5	5.6	1.5	3.92	0.75	1.2	7.58	0.41	0.37
Cpx_3	2015-02-01	25	2.42	0.58	0.79			0.35	21	14	21	670	19	23			340	147200	4000	170	152.9	3.3	0.58	4690	110	2.9	443	9.1	0.39	1682	55	3.1	1477	21	2.9	49.2	2.4	0.37	172.6	7.1	1.4	5.7	1	1.2	7.86	0.65	0.28
Cpx_3	2015-02-01	25	1	0.51	0.83			0.21			24	644	17	22			320	138600	4100	150	105.3	4.7	0.44	2820	170	3	287	16	0.26	1021	53	3.2	1622	25	2.1	52	1.7	0.42	168.8	5.9	0.99	5.55	0.95	1.1	4.6	0.53	0.29
Cpx_4	2015-02-01	25	1.44	0.63	0.94			0.38			25	680	16	24			330	147400	3400	170	167	3.9	0.6	5150	110	3.1	453	8	0.43	2551	59	3.3	1408	17	2.7	49.4	1.3	0.43	186.6	5.7	1.1	4.49	0.82	0.9	7.96	0.5	0.36
Cpx_5	2015-02-01	25	1.78	0.39	0.78			0.45			26	674	15	20			300	126200	2900	140	126.8	2.5	0.59	4037	95	3.1	385.7	8.8	0.35	1806	40	3.3	1638	19	2.7	55.1	1.5	0.42	198.1	5.4	1.4	6.21	0.82	1.1	7.75	0.45	0.27
Cpx_7	2015-02-01	25	0.99	0.37	0.85			0.33	29	12	23	634	15	19			250	123800	2700	140	92.1	2	0.54	2177	45	2.9	225.6	4.1	0.28	742	23	3.9	1703	20	2.2	55.22	0.98	0.38	176.3	5.1	0.96	4.9	0.61	0.84	3.53	0.35	0.28
Cpx_1	2015-03-01	25	0.82	0.43	0.8			0.53	41	12	23	633	24	19			300	137000	2900	170	150.3	3.1	0.62	4980	100	2.5	443.4	8.2	0.44	2151	40	3.7	1601	29	2.6	53.3	1.5	0.42	177.5	4.3	1.4	6.04	0.94	1.1	8.33	0.57	0.31
Cpx_2	2015-03-01	25	3.18	0.82	0.82			0.35	37	22	24	621	39	20			270	152500	4800	160	151.2	2.6	0.56	4800	160	3.4	460	15	0.31	1417	47	2.8	1585	38	2.5	52.4	2.5	0.43	172.8	7.9	1.1	5.6	1.2	0.94	7.31	0.47	0.31
Cpx_2	2015-03-01	25	1.97	0.41	0.79			0.12			25	679	18	22			380	135400	3000	170	128.4	2.7	0.59	3842	87	2.7	368.2	6.5	0.27	1270	25	3.4	1562	18	2.6	53.9	1.3	0.41	175.4	5	1.4	6.1	0.81	0.87	6.15	0.44	0.25
Cpx_2	2015-03-01	25	2.25	0.51	0.82			0.12			26	664	18	21			230	137700	2800	170	125.7	2.1	0.54	3845	74	3.7	364.8	5.7	0.33	1160	25	3.2	1497	15	2.5	52.6	1.3	0.29	164.5	4.5	1.2	6.88	0.9	1.1	6.49	0.42	0.26
Cpx_2	2015-03-01	25	1.8	0.43	1.1			0.22			23	659	17	22			290	127000	3400	160	132.4	3.4	0.51	4590	100	3	431.9	9.2	0.33	402	11	3.3	1932	19	2.5	61.7	1.4	0.45	145.8	4.4	1.1	9.42	0.94	1.2	7.73	0.5	0.33
Cpx_3	2015-03-01	25	1.14	0.44	0.88			0.47			21	647	14	21			250	137400	2700	160	83.6	1.6	0.43	1979	43	3	212.7	3.3	0.33	1950	27	3	1209	13	2.6	46.2	1.2	0.47	202.5	5.1	1	5.84	0.73	0.79	3.71	0.32	0.23
Cpx_3	2015-03-01	25	1.93	0.74	0.82			0.12			21	634	26	19			370	139800	3600	130	124.2	3.7	0.55	3360	94	2.9	341.1	8.5	0.31	2241	46	3.4	1533	26	2.4	51.4	1.6	0.4	185	6.2	1.2	7.44	0.97	0.74	5.96	0.49	0.28
Cpx_3	2015-03-01	25	1.56	0.47	0.89			0.29	27.6	8.9	21	679	21	24			280	131600	2300	170	110.2	2.2	0.49	3237	63	3.4	321	4.4	0.37	1068	15	3	1541	17	2.3	52.5	1.2	0.38	186.1	5.2	1.3	8.09	0.99	0.82	6.18	0.44	0.27
Cpx_5	2015-03-01	25	1.15	0.41	0.92			0.36	36.3	9.3	23	676	27	18			280	147600	3800	150	142.3	4.4	0.57	4210	140	3.2	402	13	0.36	1792	28	2.7	1423	21	2.2	50	1.4	0.41	174.5	4.7	0.91	4.46	0.87	0.85	7.42	0.52	0.29
Cpx_5	2015-03-01	25	1.06	0.43	0.84			0.19	30	13	25	687	25	22			320	140200	3200	110	138	3.1	0.54	4321	86	3	402.5	8.1	0.36	929	23	3.5	1585	22	2.2	52	1.6	0.42	164.6	5.3	1.1	5.69	0.85	0.93	7.45	0.68	0.31
Cpx_6	2015-03-01	25	2.11	0.44	0.78			0.12	38	11	26	738	14	21			310	131900	2800	140	141	3.8	0.62	4540	140	3	422.2	9.7	0.31	2001	37	3.3	1590	14	1.7	52.4	1.2	0.39	187.2	4.7	1	12.6	1.4	0.93	7.94	0.49	0.22
Cpx_7	2015-03-01	25	1.57	0.71	1.4			0.85			45	897	22	43			630	110500	2200	300	4.77	0.67	1.4	132.6	8.7	5.8	3.34	0.47	0.66			7.6	49.9	3.1	4.4	0.95	0.37	0.76			2.1	2	1.2	1.8	21.37	0.96	0.54
Cpx_7	2015-03-01	25			2.1			0.74			51	905	22	53			570	112900	2900	370	4.7	0.67	1.2	136.9	9	6.8	3.14	0.42	0.61			6.8	48.6	2.9	4.8			0.7			2.1	3.7	1.3	1.9	21.43	0.88	0.58
Cpx_7	2015-03-01	25			1.5			0.83			41	904	26	44			480	114400	2900	280	5.18	0.55	1.1	128.5	8.3	6.5	2.3	0.47	0.65			6.3	46	2.2	4.2	0.97	0.31	0.8			1.9	1.75	0.79	1.7	20.3	1.1	0.54
Cpx_7	2015-03-01	25	2.97	0.76	1.8			0.4			45	901	20	40			540	110400	2800	240	5.14	0.6	1.1	148.7	8.5	5.8	2.48	0.38	0.64			6.2	44.7	2.1	5	0.88	0.38	0.74			2.3	3.38	0.91	1.9	22.5	1.1	0.61
Cpx_7	2015-03-01	25	3.75	0.77	1.5	0.44	0.34	0.37			35	859	21	38			440	92300	2500	250	5.31	0.49	1.1	238	13	5	3.01	0.33	0.52			6.4	46.8	2.3	4.5	1.1	0.43	0.72			1.7	2.9	1.1	2.1	21.02	0.92	0.51
Cpx_7	2015-03-01	25	4.3	0.9	1.4			0.36			53	865	22	31			400	93500	1900	280	5.42	0.69	1	231	13	5	2.71	0.35	0.56			6.2	43.3	1.9	3.6	0.98	0.38	0.72			1.5	3.68	0.98	1.6	20.39	0.91	0.47
Cpx_1	2014-10-01	10			4			0.99			140	750	63	140			1300	138300	4700	770	149.7	6.2	2.5	3850	160	11	394	24	1.5	1218	70	12	1314	55	11	45.7	3.5	1.6	149	12	5.2	5.6	2.4	3.2	7.2	1.6	1.7
Cpx_4	2014-10-01	10	4.7	3	4			2.2	220	100	210	760	120	170			2300	107500	6500	1100	71.9	5.2	3.5	2620	170	21	377	29	2.4	225	20	24	945	63	13	30.5	2.5	2.2	68	12	6.9	7.1	4.6	5.6	12.6	1.8	1.6
Cpx_4	2014-10-01	10			5			2	380	190	190	780	130	180			2700	116600	7900	1200	99.3	9.6	3.9	7300	1100	15	613	36	2.8	183	33	21	1952	96	17	64.1	3.2	1.8	97	13	5.8	66	30	6.9	12	3.7	1.7	1.7	1.5
Cpx_5	2014-10-01	10			4.8			1.6			170	698	81	180			1800	131000	11000	1000	130	9.2	3.5	3780	240	19	371	21	2.2	875	61	16	1414	75	13	51.3	4.6	1.6	141	12	6.5			6.2	5.8	1.9	1.6
Cpx_5	2014-10-01	10			5.3			1.8			160	620	100	200			1800	130800	6000	840	118.9	8.5	4.5	4260	310	18	668	31	2.2	291	50	26	1660	99	14	55.7	4.5	2.4	120	18	5.5	7.5	4.4	5.3	5.4	1.7	1.8
Cpx_6	2014-10-01	10			6.7			2.2			240	660	200	260			2300	124700	7000	1300	122.3	8.9	5.2	3550	230	26	608	21	2.5	443	54	27	1572	73	14	49.4	8	2.6	137	24	6.7	9.5	8	8	4.4	2.3	2.1
Cpx_6	2014-10-01	10			6.7			3			270	780	260	260			2500	123500	6000	1300	110.1	7.3	4.7	3780	220	27	608	37	3	273	28	33	1647	73	20	49.4	3	2.9	100	18	9.6	6.9	6.5	6.8	5.8	2.5	2.3
Cpx_7	2014-10-01	10			4.1	0.7	1.53	0.69			160	740	110	170			1800	129900	7900	1300	127	15	4.6	3340	370	15	332	38	2.1	1630	260	22	1440	110	11	50.6	6.4	1.6	164	21	6.3			5.2	5.1	1.4	1.7
Cpx_7	2014-10-01	10			5			1.4			210	735	50	190			1900	123800	9300	1100	107	10	5.2	2850	360	15	282	34	2.4	1020	110	22	1396	83	15	45.1	8.8	2.5	164	19	5.9	8.5	2.5	6.3	5.1	2.3	1.7
Cpx_7	2014-10-01	10			4.3			1.4			130	680	130	160			1400	125800	6800	770	115.3	6.5	3.6	3010	170	16	297	16	1.7	1332	82	18	1348	59	14	45	4	1.7	168	15	6.6	6	3.1	4	3.4	1.5	1.5
Cpx_7	2014-10-01	10			5.1			2.2			160	600	150	170			1700	122400	6200	1000	109.7	7	4.1	3130	170	19	522	46	2	273	31	22	1618	77	13	51	1.6	2.5	113.4	9.9	5.6	6.3	4.5	5.7	5.3	1.5	1.5
Cpx_8	2014-10-01	10			9.7			4.1	780	130	280	600	330	400			3300	64900	6400	1800	43	17	7.1	11000	2100	40	388	54	3.9			34	1970	230	29	62	8.6	4.5	32	15	13	180	43	8.3	18.6	4.1	3.5	3.9	2.9
Cpx_1	2015-01-01	10			4.4			2.5			130	847	99	170			1400	126800	5500	930	119	10	3.7	3960	280	17	639	37	2	183	27	18	1749	85	12	54.4	3.9	2	98.2	9.4	4.4	7.5	4.6	5.2	3.9	1.7	1.7
Cpx_2	2015-01-01	10			3.8			1.3			120	633	84	120			1200	124100	8800	650	93.3	5.9	2.8	3050	220	12	475	37	1.7	227	25	19	1770	100	9.6	55.3	4.6	1.3	105	11	5	10.9	4.9	4.2	3	1.2	1.3
Cpx_2	2015-01-01	10			3.4			0.85			110	768	69	120			1100	131100	7000	740	127	11	2.6	3400	250	11	368	24	1.8	1201	92	17	1337	62	9	46.7	3.5	1.6	153	11	4.7	5.2	2.7	4	5.1	1	1.4
Cpx_3	2015-01-01	10			5.3			1.5			200	940	110	200			1500	131600	9800	1000	135	13	3.8	3860	270	17	389	22	2.1	778	70	26	1446	90	13	55.9	6.2	2.9	144	14	6			5	6.1	1.9	2
Cpx_3	2015-01-01	10			4.8	0.8	1.2	0.61			150	880	110	190			1300	141300	8200	920	126.3	6.6	3.2	3350	210	13	358	25	2	1117	71	15	1241	79	10	45	3.9	2	145	13	5.6			5.4	4.8	1.5	1.4
Cpx_3	2015-01-01	10			3.8			1.1			140	830	110	150			1200	125700	8600	800	108.9	8.7	3.6	3570	260	19	559	44	1.9	252	37	16	1750	100	9.8	55.6	6.3	1.8	105	12	5.4			4.6	4.2	1.4	1.3
Cpx_4	2015-01-01	10			4			2.2			130	637	74	120			1100	123600	6600	810	98.8	4.6	2.2	3090	170	14	445	30	1.5	197	26	16	1937	94	11	59.6	3.6	2	111.9	9.4	5.6	4.6	2.9	4.3	4.6	1.3	1.8
Cpx_4	2015-01-01	10			2.9			1.2			120	640	67	150			1100	106800	6700	720	86.2	5.6	2.2	2250	140	14	328	26	1.5	495	34	14	1540	110	9.3	47.2	4.4	1.4	129	11	4.4	4.9	2.5	3.3	2.7	1.3	1.4
Cpx_5	2015-01-01	10			3.9			1.6			150	860	110	170			1300	122500	8500	720	108.1	6.9	3.3	3130	200	14	538	34	1.8	230	40	20	1720	110	12	57	6.2	1.9	107	13	6.5	6.1	3.9	4.1	3.9	2	1.5
Cpx_5	2015-01-01	10			6			1.5			230	820	120	200			1900	120000	23000	1300	112	22	3.8	3310	600	20	597	65	2.4	289	50	19	1890	180	18	54.1	2.8	2.9	124	10	7	7.9	4	7.4	4.9	2	2.1
Cpx_5	2015-01-01	10			4			1.8			120	766	68	140			1100	119600	8200	850	98	5.6	2.9	2740	160	13	454	27	1.8	187	32	17	1737	85	12	54.2	4.1	1.8	108.2	8.4	5	7.5	4.1	4	3.5	1.5	1.3
Cpx_6	2015-01-01	10			5.8			2.2			190	1070	180	190			1700	114600	7200	990	114.7	7.9	4.9	3600	280	17	582	46	2.7	373	53	21	1670	110	14	54.4	6.7	2.7	114	21	8			6.4	5.8	2	1.9
Cpx_7	2015-01-01	10			4.5			1.5			120	910	140	150			1200	130000	12000	800	123.9	8.1	2.7	4020	300	16	393	33	1.8	1056	91	15	1416	88	13	46.9	4.9	1.7	161	25	5			4.9	5.8	2.6	1.6
Cpx_7	2015-01-01	10			4.4			1			140	800	130	140			1200	124200	7300	720	119.8	5.9	3.3	3620	250	15	626	39	1.8	428	35	18	1627	69	13	55.1	2.7	1.8	111	11	5.6	5.7	2.8	4.2	3.7	1.4	1.4
Cpx_8	2015-01-01	10			6.8			1.3			200	1050	120	180			2000	131600	5600	1100	134	8.8	3.9	3900	260	18	383	22	2.9	747	85	20	1448	60	15	44.7	3.9	3	153	12	5.8			6.5	5.6	1.1	1.8
Cpx_8	2015-01-01	10			4.1			0.59			150	760	80	150			1300	130000	14000	910	129	11	2.9	3420	280	12	346	24	1.9	1014	86	18	1300	110	11	46.5	6.2	1.7	137	16	5	6	3.2	5.2	7.2	1.9	1.5
Cpx_1	2015-02-01	10			4.5			1.2			150	912	81	180			1500	129200	7500	930	121	12	3.8	3630	200	18	359	38	2.1	720	64	21	1400	110	12	45.7	6.4	2.8	144	19	5.8	5.7	4.6	4.2	4.9	2.2	1.9
Cpx_1	2015-02-01	10			3.9			2.2			110	636	85	110			1100	118400	7200	750	108.5	7.7	3.5	3260	270	14	527	43	1.5	262	34	15	1700	110	10	57.2	5.4	1.7	112	13	5.6	7.4	4.9	3.6	4.6	1	1.2
Cpx_2	2015-02-01	10			4.7			1.4			180	962	83	210			1400	123000	6800	1100	104.2	6.6	4.4	3370	190	23	528	35	2.2	452	37	23	1380	100	14	47.3	4.2	2.4	115	17	6.9	6.5	4.9	6	6.4	1.9	2.2
Cpx_2	2015-02-01	10			4.3	0.93	1.33	0.6	460	110	150	599	74	160			1200	120300	7600	1000	108.3	6	2.8	6860	490	14	793	55	1.7	74	18	18	2700	170	14	72.8	6.2	2.2	66.5	8.6	4.4	38	13	4.9	9.4	1.6	1.2
Cpx_3	2015-02-01	10			5.4			2.1			180	820	120	230			1400	129700	5700	1000	129.5	6.4	4.1	4080	200	16	389	14	2.2	1226	71	22	1464	80	14	46.2	3.6	1.6	168	13	7.5	10.9	4.8	5.6	5.9	1.9	1.5
Cpx_3	2015-02-01	10			4.4			1.4			210	840	140	220			1700	117500	4800	980	101.3	6.4	3.7	3000	130	23	472	23	2.2	214	21	19	1650	73	15	52.8	4	2.7	110	18	6			5.1	3.4	2.3	2
Cpx_4	2015-02-01	10			4.7	2.4	3.6	0.77			190	750	140	190			1600	128500	8900	1400	136	10	3.1	4220	270	22	678	49	2.8	495	57	21	1610	110	15	47.7	6.2	2.3	120	20	9.4	8.3	5.7	4.9	4.6	1.9	1.9
Cpx_4	2015-02-01	10			3.8			1.8			140	734	78	140			1100	133200	6200	750	137.3	8	2.9	4170	120	11	400	18	1.9	708	38	15	1511	55	11	50.4	2.9	1.9	125	15	4.1			3.7	6.5	1.4	1.2
Cpx_4	2015-02-01	10			4.9			1.1			160	784	78	150			1100	132000	7000	790	117.1	7.8	3.2	3360	180	16	354	23	1.7	1036	75	18	1446	64	10	47.1	4.6	2	151	13	6.4	5.3	3.6	4.3	4.7	1.4	1.6
Cpx_4	2015-02-01	10			5.8			0.85			180	1080	120	250			1500	133700	7700	1100	129	10	4.6	3840	190	22	381	17	2.2	1304	87	28	1411	79	16	51.9	4.3	2.6	157	23	7.6	7.7	5.4	5.3	7.9	1.6	2.6
Cpx_4	2015-02-01	10			6.1			1.4			220	1040	130	200			1300	134100	8400	990	134.8	7.8	3.8	4050	170	26	404	21	2.5	1474	85	26	1435	63	17	46.8	4.4	2.3	169	16	6.7	9.3	6.4	6.3	5.8	2	2.2
Cpx_5	2015-02-01	10			4.9			0.7			180	1090	110	200			1100	127400	7700	870	124.1	8.3	4.2	3680	270	14	367	18	2	1063	71	18	1433	69	16	48.2	3.2	2.5	155	21	5.5	7.5	3.8	5	6.2	1.7	1.9
Cpx_5	2015-02-01	10			6.4			2			220	1010	98	210			1400	133000	7100	970	149.3	9.4	4.3	4830	300	19	457	27	2.3	739	58	29	1618	91	17	52.7	4	2.3	150	16	8.8	6.7	3.7	6.4	6	1.9	2.1
Cpx_5	2015-02-01	10			5.4			2.2			180	1110	120	180			1300	129300	6300	880	110.4	6.3	4	3420	160	18	396	27	2.2	773	69	18	1470	69	13	52.3	3.9	2.1	145	20	7.1			4.7	5.7	1.7	2.4
Cpx_5	2015-02-01	10			7.4			2.4			200	860	70	210			1500	125000	11000	1200	110	14	4.5	3310	400	28	459	44	2.6	253	33	21	1760	100	16	52.7	6.2	2.4	120	15	6.6			6.8	4.7	2.3	2.2
Cpx_6	2015-02-01	10			4.4			2			160	740	100	170			1300	128600	7800	780	132.4	7.2	3	3560	290	13	384	24	2.3	1700	110	24	1495	61	14	48.9	5.2	2.3	173	14	5.4			5	6.6	2.2	1.5
Cpx_6	2015-02-01	10			5.4			1.8			170	824	90	180			1200	133600	8900	900	151	10	3.2	4350	270	22	422	27	1.9	917	77	24	1570	110	13	48.2	5.3	2.8	151	19	7.5	10.2	3.9	5.7	6.8	2.1	2.4
Cpx_6	2015-02-01	10			6.2			2.3			200	800	180	220			1400	138000	11000	990	126	11	5	3790	230	25	402	30	2.5	712	63	22	1470	140	17	48.4	7.7	2.3	145	25	7.3			5.2	8.3	2.9	2.8
Cpx_6	2015-02-01	10			6.7			2.9			220	630	120	290			1400	128000	11000	1200	102	11	5.8	3770	530	27	609	43	2.5	276	33	26	1650	130	17	49.4	7.2	3.3	111	26	8.8	8.2	4.2	8	7.3	2.1	2.6
Cpx_7	2015-02-01	10			5			2.7			190	970	110	170			1100	126800	6600	940	132.5	9.1	4.1	4120	260	14	394	25	2.1	785	68	22	1730	110	12	58.4	4.5	1.9	159	15	6.2	6.3	4	5.4	4.7	1.5	1.9
Cpx_7	2015-02-01	10			4.4			1.7			170	799	78	160			1100	135000	13000	750	130	12	3.8	4130	370	16	392	29	2.4	729	84	19	1560	140	11	52.7	5.7	2.2	130	23	6	4.6	4.5	4.4	4.6	1.8	1.8
Cpx_7	2015-02-01	10			5			3.7			160	858	98	150			1500	139600	8400	1100	147	13	3.9	4740	360	15	428	32	1.8	575	59	19	1572	60	13	49.2	4	2.4	128	12	6.3			5.4	5.2	1.8	1.8
Cpx_7	2015-02-01	10			5.9			2			140	870	98	190			930	125900	6400	870	115.3	9.6	3.5	4020	290	15	655	38	1.8	316	42	18	1833	98	15	55.6	5	2.1	122	16	5.2	10.5	5	3.8	5.25	0.98	1.3
Cpx_1	2015-03-01	10			4.5			2.4			190	840	130	120			1100	130600	9800	900	108.1	8.1	2.9	3090	210	17	312	23	1.7	1520	130	22	1266	89	13	50.4	7.3	2.1	177	20	5.6			5.3	5.5	1.7	1.7
Cpx_1	2015-03-01	10			5.2	1.3	1.8	0.67			190	710	96	140			1200	130900	7100	890	141	13	3.9	5400	500	12	465	41	2.1	561	58	21	1580	160	12	59.4	7.8	2.1	141	19	5.2			5.1	6.3	2.1	2
Cpx_1	2015-03-01	10			3.8			1.3			130	656	78	160			810	136700	8300	820	128.5	6.1	2.5	3860	190	13	394	18	2	1185	55	14	1448	66	10	48.7	3.5	2	156	15	5	6.4	3.8	4.6	7.5	1.3	1.4
Cpx_1	2015-03-01	10			4.7			0.58			170	556	72	160			1000	127100	9300	860	115.8	8.3	2.8	4330	300	17	716	48	1.9	173	26	16	2080	130	11	62.5	5.9	1.8	98	12	5.9	19.1	6.1	4.1	6.5	1.5	1.3
Cpx_2	2015-03-01	10			4.9			0.8			250	590	150	220			1400	122000	18000	1000	108	12	3.7	8900	1300	22	1050	110	2.3			25	3190	430	16	86	16	2.1	62	16	7.6	21	11	4.4	9.6	2.3	1.9	3.7	1.4
Cpx_3	2015-03-01	10			4.1			1.5			160	750	100	130			920	121600	7300	660	119.7	6.8	3.2	3690	210	16	389	21	1.6	1706	85	16	1578	84	9.5	52.8	3.8	2.1	184	16	4.3	6	2.8	3.7	7.8	1.7	1.3
Cpx_3	2015-03-01	10			6.4			1.6			210	760	120	210			1600	133000	16000	820	121	13	4.6	4170	460	19	423	46	2.4	1040	150	20	1680	110	17	57.1	9.4	2.9	182	21	8.4	9.5	7.2	5.4	7.3	2.3	2
Cpx_5	2015-03-01	10			3.7			0.53			140	796	68	120			910	132100	8400	710	132	8.1	2.2	4620	250	13	432	20	1.8	646	52	15	1550	110	13	47.4	4.8	1.5	159	14	4			4.4	7.2	1.5	1.3
Cpx_5	2015-03-01	10			3.9			1			130	904	65	170			870	133400	6900	970	132.9	7.1	3.1	4550	230	13	418	23	1.2	813	59	17	1564	91	12	52.4	3.7	1.8	164	11	5.4	5.3	2.3	3.9	6.4	1.3	1.6
Cpx_5	2015-03-01	10			3.6			0.54			160	917	74	140			800	133100	6800	660	119.5	7.2	2.8	3640	200	14	370	19	1.6	939	58	15	1534	80	11	50.1	3.7	2.1	147	10	5.3	4	2.7	3.7	5.4	1.1	1.2
Cpx_5	2015-03-01	10			4.9			0.62	680	210	170	970	120	160			970	124100	9500	790	107	10	3.2	4750	330	21	692	46	1.7	117	22	16	2480	150	13	69.7	5.9	2.2	105	14	5.6	52	15	4.5	7.6	2.2	1.7	1.93	0.66
Cpx_6	2015-03-01	10			5.2			1.1			150	980	110	190			890	137800	7700	790	153.8	7.9	2.6	5190	390	16	447	28	1.9	1380	100	19	1514	78	14	51.6	4.1	2.5	182	16	6.5	4.4	3.7	4	7.5	1.7	1.2
Cpx_6	2015-03-01	10			4.7			0.61			160	1011	81	150			730	141000	11000	770	121.2	9.1	3.4	3550	230	12	362	22	1.6	1193	88	16	1489	75	13	44.9	3.5	2.2	152	14	5.8			4	7.8	1.6	1.7
Cpx_6	2015-03-01	10			4.4			1.1			130	1020	100	140			870	136400	8600	820	124.7	7.8	2.9	3610	200	17	362	19	1.4	757	48	18	1547	71	12	52.2	4.5	1.6	136	14	6			5.4	4.8	1.5	1.6
Cpx_6	2015-03-01	10			4.4			0.67			190	1010	130	180			970	142900	9800	880	146	11	3.3	4590	190	18	424	18	2	615	47	18	1616	74	13	52.2	5.9	1.9	135	15	5.4			5.3	6.7	1.9	1.5
Cpx_6	2015-03-01	10			4.6			0.57			150	980	110	130			860	135000	8300	750	149	12	2.8	4770	300	15	452	26	1.3	494	40	17	1714	72	13	53.7	3.6	1.7	139	15	6	4.9	3.8	3.7	6.5	1.9	1.3
Cpx_6	2015-03-01	10			7.3			3.2			310	1120	300	240			1700	116000	11000	1200	117	14	5.7	5680	740	25	796	71	3.2			29	2250	230	23	57.8	9	3.6	69	18	9.4	26.5	8.3	8.4	14.7	2.5	2.8
Cpx_7	2015-03-01	10			10			3.4			320	1520	170	310			1700	127400	5500	1900			8.4	149	29	33			4.3			40	45	13	24			4.4			14			13	21.8	3.4	2.9
Cpx_7	2015-03-01	10			9.3			3.8			350	1430	190	320			1900	126600	3300	1800			8.2	158	32	32			4			32	42	16	22			3.7			10			9.6	17.3	3.1	3.3
[truncated: 76 more columns]

## Sheet: Profile_HB4_cpx4_Table3
Table 3: Profile along Cpx 4 from March 2015
Profile position (1=core)	Zr (ppm)	Cr (ppm)	V (ppm)	Sc (ppm)	Ti (ppm)	Mn (ppm)
1	4.59662	1056.7	240.186	73.6942	1828.97	1855.92
2	4.5625	1043.64	243.264	75.5773	1849.88	1824.78
3	4.56659	1052.23	246.4	76.6586	1871.68	1826.03
4	4.57827	1046.96	246.359	76.6726	1866.46	1820.11
5	4.66967	1056.36	249.031	76.2499	1863.42	1825.78
6	4.7789	1069.75	252.284	75.727	1862.2	1834.55
7	4.78263	1070.19	251.711	75.7593	1870.64	1832.62
8	4.79526	1077.5	251.882	76.2631	1883.01	1837.29
9	4.81818	1092.77	252.91	77.3116	1899.94	1849.6
10	4.83354	1102.29	252.141	77.3688	1913.82	1867.38
11	4.86858	1110.39	251.879	77.4158	1927.33	1884.11
12	4.99031	1117.45	255.191	78.2482	1941.91	1892
13	5.04576	1114.05	256.257	78.5397	1945.94	1893.46
14	5.04974	1102.51	255.579	78.411	1941.78	1889.93
15	5.07742	1109.59	255.901	79.0975	1946.19	1895.22
16	5.08725	1112.83	255.55	79.5093	1947.25	1891.13
17	5.05023	1103.56	253.411	79.1176	1938.78	1863.07
18	5.08241	1116.28	253.151	79.3648	1951.3	1872.17
19	5.14912	1140.08	253.868	79.939	1974.41	1899.8
20	5.18612	1157.76	255.139	80.5235	1992.84	1911.8
21	5.25251	1170.72	255.019	80.8311	2001.92	1919.06
22	5.36405	1176.41	252.763	80.7134	1996.64	1919.04
23	5.28644	1157.11	250.78	79.163	1963.25	1924.05
24	5.23535	1141.25	250.83	78.0611	1935.31	1929.38
25	5.18251	1141.87	249.163	77.5703	1924.24	1920.45
26	5.01777	1117.77	248.92	76.0139	1875.85	1914.35
27	5.05806	1131.22	248.689	76.2104	1866.57	1931.43
28	5.01309	1140.94	248.927	75.6166	1872.47	1924.67
29	4.95792	1139.96	248.744	74.8562	1870.96	1910.85
30	4.9331	1107.53	246.661	74.1039	1839.66	1886.68
31	5.01256	1096.11	246.908	73.715	1833.12	1888.04
32	5.16387	1099.19	248.761	73.5764	1843.65	1907
33	5.24974	1098.96	252.728	73.7269	1851.73	1906.96
34	5.31278	1096.63	255.224	73.8432	1853.65	1900.09
35	5.33421	1090.26	254.468	73.8621	1842.97	1880.7
36	5.37755	1097.53	255.201	74.2077	1852.24	1887.04
37	5.42136	1109.31	256.438	74.6076	1867.65	1902.55
38	5.31116	1094.61	255.022	73.4913	1837.31	1879.24
39	5.32656	1096.14	257.53	73.0059	1823.22	1872.82
40	5.51301	1119.78	265.381	73.3796	1831.28	1889.41
41	5.57633	1137.11	269.254	74.1244	1845.3	1890.42
42	5.61112	1148.78	271.26	74.8238	1858.91	1883.99
43	5.669	1138.93	268.899	74.7424	1861.66	1859.85
44	5.74831	1142.4	270.524	75.1487	1876.77	1862.3
45	5.84722	1158.05	275.794	76.001	1903.2	1889.08
46	5.7142	1175.17	273.502	77.5776	1970.18	1831.12
47	5.6776	1184.6	272.364	77.8829	1990.58	1797.91
48	5.57584	1183.62	268.29	77.6583	2005.44	1753.11
49	5.57044	1217.75	264.794	77.9353	2074.07	1701.3
50	5.93842	1256.7	271.63	78.6649	2137.33	1714.9
51	6.26844	1297.25	281.857	79.8957	2208.9	1743.29
52	6.55135	1327.85	290.069	81.0169	2262.48	1761.32
53	6.74904	1340.21	294.517	81.9259	2282.96	1760.06
54	7.01672	1349.04	298.47	82.927	2315.58	1761.71
55	7.30827	1357.62	302.312	83.968	2353.46	1764.39
56	7.56441	1378.1	307.014	85.0516	2396.91	1765.92
57	7.78361	1386.75	309.882	85.6766	2429.81	1757.24
58	7.95811	1381.07	310.53	85.7469	2449.94	1736.2
59	8.08319	1371.23	310.996	85.1715	2442.12	1714.22
60	8.22412	1368.34	313.688	84.8675	2443.37	1695.29
61	8.48293	1400.09	326.352	86.3871	2511.75	1690.78
62	8.80809	1426.31	334.887	87.5398	2556.45	1692.29
63	9.18724	1448.03	340.064	88.3938	2581.89	1698.7
64	9.35586	1467.56	340.477	88.7392	2623.49	1708.98
65	9.5016	1485.25	341.068	89.0813	2666.96	1711.91
66	9.63733	1498.8	343.186	89.5299	2711.5	1695.39
67	9.96475	1515.22	350.864	90.4985	2748.14	1687.91
68	10.5589	1551.78	364.582	93.0066	2827.85	1678.32
69	11.4784	1672.24	386.58	99.9439	3094.19	1652.07
70	11.6711	1699.83	392.532	101.28	3150.8	1648.79
71	12.2748	1746.99	402.203	105.866	3310.2	1595.78
72	12.8397	1770.11	411.37	108.54	3425.89	1548.91
73	13.0652	1759.98	415.724	108.247	3452.08	1535.76
74	13.2518	1776.53	421.288	109.219	3510.48	1530.22
75	13.3547	1778.43	421.45	109.266	3529.18	1522.49
76	13.3672	1764.56	415.8	108.317	3505.14	1512.38
77	13.5539	1775.22	418.764	108.779	3537.88	1544.24
78	13.7227	1785.84	422.556	109.357	3571.53	1573.84
79	13.7119	1780.17	423.719	109.43	3571.18	1567.51
80	13.6629	1772.6	421.665	108.921	3554.09	1552.42
81	13.5863	1763.64	417.286	107.992	3524.9	1530.98
82	13.7311	1789.24	421.206	108.787	3583.49	1559.14
83	13.8735	1804.49	423.866	109.351	3630.67	1571.74
84	13.9832	1792.76	422.732	109.191	3641.99	1544.09
85	14.0887	1797.19	423.755	109.62	3659.96	1543.25
86	14.1883	1808.92	425.698	110.353	3680.96	1554.63
87	14.2066	1813.45	425.578	111.645	3699.97	1557.17
88	14.2078	1809.77	426.886	112.013	3710.06	1554.43
89	14.1845	1794.34	430.235	111.064	3707.41	1544.17
90	14.2024	1801.44	434.545	111.282	3710.28	1554.48
91	14.6125	1803.81	440.385	113.645	3777.25	1569.13
92	15.1429	1788.95	442.38	116.22	3878.48	1571.64
93	15.2296	1788.7	441.149	116.49	3893.36	1582.86
94	15.8271	1765.88	447.693	119.677	3998.11	1594.71
95	15.7657	1749.71	445.982	119.701	4009.26	1592
96	15.5598	1738.26	441.506	118.94	3990.18	1586.32
97	15.332	1730.43	436.704	118.207	3961.57	1572.92
98	15.2218	1728.84	435.25	117.773	3944.75	1564.1
99	15.1869	1731.26	435.939	117.53	3935.49	1558.22
100	15.3722	1751.15	442.243	119.333	3946.32	1574.27
101	15.4321	1759.22	447.034	120.398	3950.43	1581.81
102	15.2403	1743.7	448.652	119.947	3940.67	1571.91
103	15.1923	1749.84	450.535	119.979	3947.14	1583.66
104	15.1952	1764.42	452.29	120.176	3958.81	1602.05
105	15.0943	1773.14	451.104	119.945	3952.11	1592.11
106	14.8783	1777.36	449.638	119.613	3927.62	1579.18
107	14.5164	1775.88	447.817	119.152	3880.59	1562.47
108	14.3343	1791.63	452.634	119.602	3889.65	1563.91
109	14.1847	1808.36	456.404	120.051	3902.97	1566.96
110	13.9864	1810.13	447.641	119.465	3872.85	1556.94
111	13.8692	1819	442.363	119.163	3851.57	1555.64
112	13.8214	1833.91	440.056	119.102	3837.8	1561.74
113	13.7708	1838.18	440.42	119.035	3826.78	1566.92
114	12.5881	1916.07	428.72	114.321	3652.49	1585.78
115	11.9458	1928.02	421.17	111.535	3562.99	1590.6
116	11.3277	1929.22	411.923	108.264	3464.82	1581.21
117	9.86658	1955.68	390.474	101.643	3271.45	1563.34
118	9.84152	1969.16	389.172	100.645	3250.02	1555.47
119	9.83394	1977.76	388.707	100.432	3242.75	1555.75
120	9.85595	1978.09	389.66	101.55	3259.47	1569.8
121	9.86403	1977.73	389.6	101.94	3270.82	1577.65
122	9.87339	1978.91	389.569	102.11	3280.46	1584.98
123	9.9366	1995.49	392.891	102.628	3291.93	1606.81
124	9.89132	1991.92	394.579	103.289	3292.84	1612.18
125	9.72375	1965.65	394.424	104.112	3281.86	1598.97
126	9.52857	1936.52	386.955	102.409	3220.22	1582.72
127	9.38213	1914.54	380.276	100.805	3168.79	1571.23
128	9.44873	1922.94	382.34	101.534	3196.47	1580.85
129	9.43612	1902.8	381.446	101.592	3196	1576.32
130	9.36349	1861.05	378.313	101.141	3174.2	1561.06
131	9.36274	1862	378.075	100.206	3143.92	1567.92
132	9.33836	1864.77	378.062	99.458	3123.68	1573.84
133	9.24768	1864.92	378.105	99.2193	3128.05	1574.04
134	9.17125	1844.14	377.891	99.092	3137.47	1558.99
135	9.1096	1814.46	377.572	99.0382	3149.71	1537.89
136	9.25717	1801.29	376.606	99.4111	3169.67	1558.86
137	9.21801	1662.26	370.229	99.3875	3178.69	1556.7
138	9.12679	1633.84	366.535	99.2364	3160.26	1546.47
139	9.16109	1531.45	360.954	99.7508	3163.12	1550.98
140	9.31965	1456.05	357.616	100.72	3190.26	1562.54
141	9.40671	1447.05	362.716	101.215	3216.95	1571.21
142	9.45741	1432.48	364.809	101.344	3229.53	1568.16
143	9.47162	1412.34	363.886	101.105	3227.96	1553.35
144	9.62305	1417.1	368.927	101.203	3251.21	1563.95
145	9.76993	1424.41	373.958	101.744	3282.85	1578.38
146	9.83103	1427.4	375.88	103.581	3329.55	1592.4
147	9.96584	1410.69	377.006	104.107	3327.47	1586.66
148	10.1502	1380.74	377.596	103.751	3292.62	1567.64
149	10.3323	1372.71	381.564	104.824	3309.75	1575.95
150	10.4339	1367.12	385.387	105.598	3318.33	1581.18
151	10.3726	1364.84	388.664	105.661	3305.7	1578.13
152	10.4902	1360.21	386.881	105.842	3312.55	1576.53
153	10.6804	1354.02	383.239	106.103	3328.42	1575.82
154	10.7933	1339.84	384.67	106.775	3352.44	1578.69
155	10.8624	1326.58	387.41	107.329	3378.27	1576.24
156	10.8729	1314.54	391.889	107.726	3406.49	1566.75
157	11.0161	1313.01	396.377	108.459	3435.08	1571.18
158	11.1594	1312.39	400.328	109.161	3462.89	1577.43
159	11.034	1297.73	397.782	108.501	3447.08	1583.36
160	10.8918	1290.73	391.932	107.381	3394.83	1599.88
161	10.95	1297.92	392.509	107.856	3427.53	1607.83
162	10.8271	1285.82	388.181	106.15	3310.06	1626.61
163	10.7104	1264.12	383.677	104.25	3222.69	1622.3
164	10.6078	1254.15	382.361	103.524	3197.04	1623.8
165	10.5974	1256.68	382.301	103.701	3187.28	1629.61
166	10.6419	1266.64	382.988	104.414	3186.97	1637.99
167	10.555	1247.12	377.306	104.217	3151.09	1624.09
168	10.4868	1236.52	372.962	104.06	3132.27	1620.62
169	10.4537	1242.15	371.076	103.984	3144.24	1635.95
170	10.3547	1246.76	374.035	104.174	3151.46	1626.52
171	10.2519	1253.05	378.76	104.484	3161.02	1611.24
172	10.3563	1279.56	382.875	104.998	3211.3	1630.29
173	10.38	1294.56	383.695	105.285	3241.12	1638.37
174	10.3083	1295.98	380.623	105.302	3246.79	1633.52
175	10.3734	1291.86	379.819	105.378	3259.15	1615.5
176	10.4486	1288.22	379.598	105.462	3270.71	1600.7
177	10.4437	1291.57	379.81	105.521	3272.96	1611.33
178	10.4741	1301.43	381.496	106.085	3302.6	1622.12
179	10.5325	1316.46	384.352	107.052	3353.97	1633.05
180	10.5875	1310.68	386.353	106.65	3370.15	1629.96
181	10.6951	1309.8	388.824	106.458	3394.21	1633.63
182	10.9318	1325.14	392.617	107.055	3444.72	1656.64
183	10.7271	1302.64	400.718	107.06	3480.84	1655.14
184	10.3371	1254.3	403.925	106.075	3474.62	1641.29
185	10.3445	1245.21	406.474	106.196	3457.12	1641.16
186	9.96468	1165.13	411.776	105.375	3412.83	1626.76
187	9.89983	1138.71	412.287	104.567	3371.98	1612.31
188	9.91966	1132.42	414.373	104.416	3368.97	1615.58
189	9.93031	1127.79	417.291	104.477	3376.77	1622.81
190	9.88975	1128.97	421.199	105.078	3389.87	1623.43
191	9.92984	1131.92	423.741	105.406	3383.91	1625.1
192	10.0546	1136.71	424.849	105.447	3357.95	1627.87
193	10.069	1141.11	426.54	105.281	3371.42	1646.33
194	10.0609	1143.36	428.786	105.264	3391.04	1662.75
195	10.0401	1138.2	432.646	105.899	3408.56	1662.52
196	10.1202	1130.64	434.803	105.857	3393.32	1666.57
197	10.2715	1121.39	435.76	105.339	3354.99	1673.64
198	10.338	1112.91	436.802	105.432	3367.01	1678.65
199	10.3107	1097.37	436.511	105.237	3368.3	1678.13
200	10.0924	1066.72	433.365	104.364	3341.35	1666.02
201	10.0299	1058.77	430.342	104.389	3345.84	1672.83
202	10.0398	1060.72	427.809	104.855	3367.19	1688.04
203	10.0656	1053.25	433.265	105.836	3433.08	1698.11
204	10.0082	1049.63	434.863	106.239	3459.73	1703.4
205	9.8351	1051.38	431.085	105.837	3431.73	1702.03
206	10.8628	956.78	427.753	108.365	3530.25	1708.57
207	11.3756	912.564	428.021	109.46	3580.9	1715.08
208	11.7732	876.164	426.276	110.563	3609.23	1708.49
209	12.9381	797.045	428.215	113.22	3698.95	1704.67
210	13.092	805.686	430.93	113.131	3724.03	1713.36
211	13.1772	812.393	436.91	113.963	3779.41	1723.49
212	13.236	814.306	440.718	114.383	3817.69	1729.67
213	13.2428	802.561	436.688	113.198	3792.44	1723.4
214	13.1765	796.255	434.665	112.569	3776.41	1726.06
215	13.0646	793.344	433.896	112.288	3766.13	1734.29
216	13.1429	789.847	437.615	111.792	3768.43	1725.55
217	13.2128	786.566	438.928	111.208	3771.01	1713.68
218	13.2608	783.712	435.582	110.469	3773.66	1696.54
219	13.2683	775.872	427.852	109.516	3738.88	1686.37
220	13.2493	766.428	419.374	108.582	3693.19	1679.01
221	13.1105	761.396	422.33	108.831	3693.45	1672.01
222	13.1461	763.967	424.896	109.355	3712.41	1673.28
223	13.3974	775.94	426.98	110.219	3754.48	1684.75
224	13.4312	775.414	429.981	109.9	3744.49	1693.13
225	13.4184	771.958	432.565	109.456	3725.73	1701.74
226	13.4202	768.212	432.282	109.678	3721.42	1714.61
227	13.4462	763.447	430.866	109.634	3710.04	1719.34
228	13.4185	759.294	428.13	109.62	3703.02	1716.91
229	13.0941	767.446	426.278	111.674	3772.41	1724.01
230	13.0604	766.939	425.657	112.177	3776.51	1727.46
231	12.5084	764.604	421.02	111.881	3747.32	1706.64
232	12.0879	765.828	418.749	112.088	3724.76	1694.13
233	12.0522	768.748	419.964	112.794	3719.56	1695.44
234	12.1708	766.514	412.202	111.787	3676.34	1694.79
235	12.164	766.949	406.939	111.067	3648.03	1694.56
236	11.9504	771.785	405.799	110.819	3644.33	1695.02
237	11.6649	766.257	403.963	110.173	3637.07	1674.1
238	11.3887	757.695	401.597	109.322	3624.69	1647.41
239	11.3895	753.51	396.879	107.918	3580.81	1633.76
240	11.4072	753.21	395.203	107.362	3565.99	1632.48
241	11.4436	757.184	396.872	107.739	3583.12	1644.81
242	11.3496	753.304	397.455	107.875	3575.31	1643.22
243	11.2816	748.823	397.69	108.091	3565	1646.18
244	11.405	747.631	397.384	108.78	3562.87	1676.25
245	11.4263	744.686	397.417	108.976	3554.22	1691.21
246	11.3722	740.445	397.701	108.808	3540.73	1695
247	11.3696	739.178	396.479	109.214	3542.06	1719.13
248	11.3481	736.834	396.376	109.035	3537.27	1736
249	11.2771	731.649	399.005	107.456	3516.64	1733.71
250	11.1626	724.431	400.442	106.74	3505.54	1730.11
251	12.6889	621.364	479.12	106.556	3881.02	1820.8
252	15.0638	471.191	597.098	105.8	4437.89	1961.31
253	14.9673	465.533	598.462	105.37	4417.83	1964.75
254	18.043	273.311	740.306	105.426	5150.04	2169.26
255	18.5729	207.086	762.361	102.699	5279.66	2210.12
256	18.164	194.21	743.232	99.8389	5193.37	2196.15
257	17.7639	191.639	737.083	99.9991	5164.59	2220.24
258	17.3079	187.057	723.87	99.3882	5107.74	2237.21
259	16.7971	180.507	703.739	98.0223	5023.41	2247.21
260	16.5408	178.289	700.723	97.616	4978.23	2266.13
261	16.3085	176.668	699.081	97.4352	4934.39	2280.89
262	16.0326	174.911	693.761	97.5235	4876.37	2278.09
263	15.6548	173.964	680.38	96.7316	4793.65	2262.56
264	15.2101	173.548	661.718	95.363	4694.75	2238.69
265	14.9363	177.534	665.872	95.4444	4668.21	2260.68
266	14.5845	178.93	665.878	95.5161	4636.41	2271.29
267	14.0687	174.958	656.344	95.4814	4589.93	2256.7
268	13.5407	175.304	642.734	94.6477	4480.86	2248.79
269	13.0338	177.723	629.317	93.6262	4353.8	2245.26
270	12.8769	183.477	641.62	94.6172	4340.18	2262.55
271	12.6202	188.543	645.315	95.201	4306.41	2270.97
272	12.234	192.718	637.853	95.2571	4246.54	2267.87
273	12.1026	200.678	641.784	95.9788	4257.69	2292.89
274	11.4122	200.977	633.72	94.0272	4087.21	2142.36
275	10.9351	196.101	622.373	92.0271	3965.97	2022.28
276	10.7888	191.682	617.001	91.0957	3909	1950.51
277	10.8076	176.579	612.342	90.229	3825.42	1765.5
278	10.9919	171.895	614.396	90.0481	3844.4	1761.65
279	11.1381	167.544	615.157	89.7076	3850.08	1754.95
280	11.2273	164.333	612.839	89.3909	3837.91	1744.96
281	11.3163	160.512	608.592	89.265	3855.09	1726
282	11.4053	156.339	603.229	89.2494	3889.28	1701.85

## Sheet: Profile_HB5_cpx4_Table4
Table 4: Profile along Cpx 4 from February 2015
Profile position (1=core)	Zr (ppm)	Cr (ppm)	V (ppm)	Sc (ppm)	Ti (ppm)	Mn (ppm)
1	21.3632	1989.03	452.005	145.367	4783.87	1423.86
2	21.2161	1989.42	452.574	144.872	4790.24	1428.09
3	21.1095	1984.87	451.066	144.375	4769.54	1427.09
4	21.0296	1979.92	449.211	144.116	4744.23	1423.28
5	20.9362	1991.33	453.312	145.1	4796.14	1424.54
6	20.7843	1997.81	454.234	144.556	4787.84	1425.17
7	20.669	2001.34	454.25	143.793	4773.67	1426.31
8	20.6722	2002.28	454.673	143.68	4790.79	1428.99
9	20.616	2088.72	453.403	143.27	4686.83	1410.72
10	20.5502	2136.27	456.528	143.081	4651.78	1408.42
11	20.4948	2171.29	461.438	143.043	4652.2	1413.99
12	20.4374	2248.22	459.967	142.895	4575.73	1397
13	20.3266	2276.35	459.194	143.004	4562.02	1399.42
14	20.2519	2294.47	458.655	143.013	4557.55	1408.14
15	19.9631	2291.42	451.976	141.637	4502	1394.27
16	19.922	2310.19	455.144	141.528	4513.03	1396.52
17	19.9987	2325.22	457.696	141.307	4518	1401.48
18	20.1683	2326.37	455.654	140.446	4488.97	1404.72
19	19.5636	2304.91	451.526	139.119	4398.18	1386.83
20	19.2789	2308.26	451.367	138.528	4374.19	1382.82
21	19.3128	2332.49	454.681	138.77	4403.14	1392.29
22	19.6083	2358	459.303	140.48	4413.86	1412.91
23	19.7481	2357.75	458.371	141.232	4398.71	1415.52
24	19.81	2361.67	456.115	141.799	4399.49	1421.58
25	19.835	2400.34	456.024	142.841	4463.25	1453.18
26	19.6777	2382.9	452.867	141.522	4440.4	1451.97
27	19.6432	2378.13	453.651	141.719	4438.56	1455.79
28	19.7799	2397.34	459.567	143.996	4473.81	1470.81
29	19.7631	2400.29	463.414	143.037	4441.99	1476.83
30	19.5002	2383.36	459.054	141.678	4383.34	1465.09
31	19.101	2327.07	452.105	140.613	4328.46	1448.75
32	18.7644	2161.87	455.129	141.728	4355.29	1457.98
33	18.8011	2131.07	457.078	142.095	4352.71	1467.46
34	18.1026	2091.84	452.018	140.891	4276.42	1458.38
35	17.2741	2033.6	441.585	138.171	4160.61	1431.3
36	17.2281	2038.76	442.994	138.373	4177.46	1429.08
37	16.3489	1994.74	436.19	137.206	4108.15	1418.25
38	16.1371	1981.7	434.082	137.277	4081.49	1430.54
39	15.8889	1949.96	427.901	136.661	4019.75	1417.7
40	15.8629	1939.8	426.688	136.497	4020.75	1414.8
41	15.9525	1937.25	427.126	136.501	4037.28	1417.21
42	16.0788	1928.27	425.799	136.389	4016.85	1421.67
43	15.8961	1914.41	428.411	137.603	4049.81	1413.5
44	15.8462	1922.06	433.096	138.425	4090.04	1417.56
45	16.0477	1959.22	439.536	138.398	4126.33	1440.81
46	16.0647	1934.12	438.086	138.243	4077.05	1434.32
47	16.0473	1922.63	439.179	138.477	4071.01	1437.58
48	15.9926	1920.72	441.084	138.679	4086.55	1445.41
49	15.873	1919.22	438.291	137.395	4060.27	1442.43
50	15.8207	1912.74	437.024	136.942	4022.41	1434.72
51	15.8135	1910.44	436.251	136.767	3995.02	1429.13
52	15.8526	1919.88	435.45	136.599	3996.46	1430.96
53	15.7753	1912.25	436.015	135.018	3966.11	1430.28
54	15.7058	1895.7	435.974	134.508	3971.64	1419.44
55	15.6946	1877.39	435.83	135.288	4016.14	1403.09
56	16.1645	1929.79	443.751	136.746	4048.99	1444.68
57	16.259	1932.82	445.482	137.126	4041.17	1453.58
58	16.1607	1918.39	444.811	136.848	4021.26	1446.26
59	16.2992	1944.14	449.383	136.458	4056.2	1442.59
60	16.6932	1965.78	450.106	136.566	4088.41	1449.04
61	16.6859	1960.2	445.939	136.605	4076.84	1448.03
62	16.7822	1948.11	441.791	136.979	4087.31	1427.23
63	17.3528	1969.12	448.738	137.995	4133.56	1439.14
64	17.4206	1958.4	448.241	137.29	4116.93	1440.26
65	17.2377	1929.85	442.808	135.46	4080.31	1427.09
66	17.125	1934.33	445.156	135.296	4127.17	1423.87
67	17.2299	1949.19	448.304	135.832	4156.67	1436.7
68	17.3088	1956.36	450.018	136.631	4170.65	1447.26
69	17.1348	1936.59	447.721	137.416	4164.35	1438.33
70	17.0354	1931.02	447.982	136.279	4153.28	1418.71
71	17.0397	1932.81	448.606	135.545	4139.5	1415.94
72	17.1444	1939.3	449.096	135.561	4123.24	1432.51
73	17.0858	1911.89	446.104	135.478	4105.34	1412.91
74	17.2451	1923.96	449.79	136.354	4120.68	1420.2
75	17.4972	1949.56	455.238	137.553	4148.95	1437.16
76	17.6072	1936.81	452.188	137.801	4150.76	1429.74
77	17.4816	1894.86	446.736	137.129	4145.51	1405.23
78	17.4001	1870.59	443.88	136.766	4142.3	1390.99
79	17.5025	1889.93	446.569	137.354	4145.83	1402.13
80	17.5049	1882.71	441.985	137.315	4115.99	1398.28
81	17.5293	1881.61	442.642	137.96	4131.39	1397.43
82	17.5831	1886.42	447.387	139.09	4178.26	1401.2
83	17.6785	1885.36	445.137	139.024	4145.23	1414.95
84	17.5607	1873.14	445.118	139.932	4125.96	1415.25
85	17.5625	1901.84	455.734	142.235	4157.81	1435.38
86	17.57	1904.11	458.999	143.11	4179.85	1440.4
87	17.6567	1927.95	468.014	144.123	4221.57	1461.38
88	17.7635	1964.79	481.533	145.478	4284.5	1497.37
89	17.7469	1943.82	478.921	144.832	4256.7	1494.89
90	17.879	1941.4	480.455	146.068	4303.34	1491.19
91	17.9947	1947.61	481.904	147.089	4335.91	1494.11
92	18.0414	1956.38	481.945	147.76	4357.18	1498.67
93	17.8208	1950.04	475.755	147.488	4370.12	1490.25
94	17.9161	1954.26	474.535	147.601	4382.2	1480.96
95	18.0857	1957.84	473.559	147.885	4386.97	1477.07
96	18.2047	1953.69	469.993	148.265	4378.08	1484.18
97	18.0903	1938.66	464.651	149.133	4356.71	1469.33
98	18.0226	1940.59	464.161	149.662	4366.06	1463.51
99	18.0365	1957.77	468.03	149.718	4401.48	1467.5
100	18.221	1947.06	465.133	148.72	4375.85	1460.32
101	18.2951	1938.68	463.854	149.038	4380.06	1459.58
102	18.3021	1935.29	463.939	149.832	4402.82	1464.37
103	18.2746	1943.67	465.703	150.036	4436.19	1476.1
104	18.2458	1927.82	461.478	148.324	4417.44	1491.72
105	18.2728	1918.48	458.73	147.368	4417.47	1502.24
106	18.3816	1926.16	459.992	148.11	4461.05	1504.12
107	18.4159	1936.55	459.135	146.966	4473.72	1518.77
108	18.2241	1918.4	454.751	146.476	4469.17	1506.68
109	17.961	1885.27	449.176	146.425	4457.23	1479.34
110	18.2684	1890.68	451.996	145.931	4476.16	1481.67
111	18.6813	1883.93	456.295	145.115	4520.07	1463.98
112	19.0216	1879.99	461.238	144.74	4580.49	1440.68
113	19.2088	1885.71	463.933	145.011	4608.05	1442.33
114	19.3774	1888.72	466.288	142.789	4634.6	1418.61
115	19.3088	1881.21	466.047	141.545	4624.26	1395.54
116	19.1024	1874.51	466.795	142.301	4608.84	1387.89
117	19.1165	1877.41	467.493	141.964	4612.52	1391.54
118	19.0021	1863.07	463.875	139.968	4581.69	1383.48
119	18.8648	1846.14	459.761	137.736	4547.28	1370.47
120	18.9139	1855.97	462.901	138.126	4572.3	1363.98
121	18.9227	1871.45	463.42	137.694	4570.71	1369.17
122	18.8455	1870.44	461.202	137.043	4549.13	1366.13
123	18.6436	1839.85	455.571	136.381	4505.8	1344.58
124	18.6077	1850.98	459.367	136.858	4540.53	1356.31
125	18.5547	1853.38	459.514	137.133	4552.74	1358.07
126	18.4841	1846.4	456.496	137.183	4545.76	1350.93
127	18.436	1836.95	455.76	137.152	4560.81	1350.09
128	18.4544	1836.08	455.385	136.894	4546.14	1348.53
129	18.4735	1835.21	453.386	136.456	4515.51	1343.57
130	18.422	1825.01	446.852	135.804	4476.55	1330.73
131	18.3996	1836.7	449.005	137.025	4506.84	1329.51
132	18.4995	1851.88	450.792	137.858	4519.22	1334.11
133	18.7323	1866.1	450.298	137.82	4495.34	1343.11
134	18.3851	1842.12	446.332	137.354	4474.09	1329.65
135	18.2716	1840.02	446.899	137.09	4477.49	1327.95
136	17.673	1856.41	440.063	135.541	4402.18	1328.52
137	16.1988	1881.97	420.257	132.128	4199.41	1325.62
138	16.0768	1878.1	418.197	132.157	4188.34	1323.36
139	15.0128	1885.17	404.478	130.188	4047.68	1315.79
140	13.5966	1889.98	387.002	127.384	3880.25	1302.87
141	13.3339	1892.98	385.272	126.502	3857.89	1310.61
142	13.0349	1895.16	382.825	126.262	3843.43	1312.03
143	12.7309	1896.5	380.184	126.684	3840.38	1307.03
144	12.7438	1904.34	383.308	126.979	3860.04	1309.01
145	12.7345	1912.91	383.74	126.309	3842.25	1313.26
146	12.6299	1913.21	381.581	125.429	3806.8	1313.4
147	12.2754	1887.96	375.651	125.32	3773.31	1298.07
148	12.2659	1892.86	376.809	125.302	3779.49	1305.45
149	12.2027	1894.68	377.33	124.873	3770.17	1310.72
150	11.9663	1883.65	374.953	123.839	3727.73	1306.59
151	11.8492	1875.66	376.66	124.797	3718.77	1305.12
152	11.8143	1871.29	377.556	125.157	3713.72	1309.65
153	11.8402	1868.74	377.366	124.991	3708.29	1317.45
154	11.871	1861.77	374.626	124.406	3686.08	1319.15
155	11.8833	1861.96	377.145	125.373	3733.27	1318.8
156	11.9	1861.19	379.102	126.018	3768.91	1318.13
157	11.9402	1852.93	375.872	124.801	3727.29	1318.35
158	11.9736	1842.32	376.09	124.795	3734.49	1319.62
159	11.9858	1837.96	377.679	124.93	3753.36	1320.45
160	11.99	1839.88	380.287	125.078	3777.56	1321.3
161	12.4404	1815.72	384.483	125.451	3803.68	1336.93
162	13.7306	1741.25	396.641	126.214	3936.81	1372.71
163	14.0907	1722.87	399.086	126.293	3977.12	1385.17
164	14.5298	1688.5	402.592	126.304	4041.92	1389.84
165	15.4463	1617.89	414.01	126.657	4200.58	1417.69
166	15.4914	1620.38	417.095	126.831	4220.69	1429.95
167	15.6054	1615.36	415.215	126.747	4212.14	1435.3
168	15.5284	1597.31	412.887	127.481	4213.69	1427.33
169	15.435	1594.83	413.403	127.729	4215.23	1430.42
170	15.3423	1602.7	415.477	127.415	4207.98	1439.78
171	15.3104	1590.56	412.03	126.181	4143.06	1426.82
172	15.2924	1586.98	411.74	126.362	4132.72	1426.13
173	15.3005	1591.64	412.941	127.063	4144.05	1434.86
174	15.3585	1607.92	414.623	127.618	4153.6	1454.35
175	15.174	1590.11	410.624	127.758	4123.71	1446.87
176	14.9636	1584.29	410.083	128.114	4123.73	1446.53
177	14.7683	1598.46	414.481	128.757	4164.5	1459.16
178	14.6633	1591.31	410.362	127.833	4125.44	1454.98
179	14.4936	1584.77	406.299	127.555	4099.71	1449.85
180	14.3291	1580.1	402.965	127.584	4088.58	1444.78
181	14.3563	1581.5	402.506	127.198	4103.1	1442.36
182	14.3462	1573.02	399.938	126.732	4071.97	1441.63
183	14.2742	1568.01	398.813	126.731	4052.46	1442.52
184	14.1097	1574.47	401.405	127.614	4077.87	1445.44
185	14.1311	1584.72	402.873	127.207	4064.75	1454.06
186	14.0777	1576.13	399.311	126.15	4009.58	1447.32
187	14.8762	1470.91	410.57	127.766	4067.48	1462.13
188	15.2494	1431.92	418.154	129.457	4150.53	1480.08
189	15.4907	1407.24	422.161	130.528	4188.13	1487.86
190	16.6483	1299.56	443.46	134.763	4349.42	1522.9
191	16.9898	1271.89	451.125	136.65	4409.67	1535.59
192	17.0461	1264.79	449.824	135.99	4416.12	1531.79
193	17.1257	1247.67	448.321	135.406	4425.5	1528.54
194	17.2502	1217.26	447.713	135.383	4444.23	1528.43
195	17.6463	1233.67	454.124	136.529	4530.06	1553.06
196	17.9128	1230.13	454.49	136.351	4545.57	1552.26
197	18.072	1214.17	451.941	135.752	4529.62	1536.75
198	18.155	1207.05	456.403	137.778	4607.47	1538.41
199	18.2819	1194.5	457.238	138.365	4637.63	1535
200	18.4232	1181.87	457.561	138.388	4653.12	1532.36
201	18.5632	1172.85	459.368	138.258	4671.82	1534.84
202	18.4205	1148.65	459.865	138.72	4669.27	1522.23
203	18.4893	1133.27	461.948	138.951	4674.37	1520.75
204	18.7867	1127.33	464.941	138.864	4686.64	1530.65
205	18.784	1102.81	456.072	138.596	4657.98	1515.81
206	18.9493	1097.15	457.264	138.644	4680.06	1513.74
207	19.1885	1098.54	461.538	138.618	4711.38	1518.62
208	19.3734	1089.75	458.114	137.787	4683.02	1523.82
209	19.3614	1081.8	458.862	137.952	4698.71	1521.48
210	19.4028	1073.47	461.237	137.926	4721.44	1520.45
211	19.5962	1064.23	464.635	137.25	4739.34	1524.09
212	19.7442	1038.3	465.347	138.334	4761.71	1516.45
213	19.6955	1016.69	464.384	138.491	4773.77	1506.25
214	19.6632	1011.22	464.425	138.209	4764.33	1499.78
215	19.6106	992.622	456.721	137.883	4723.77	1484.59
216	19.4424	996.639	457.067	137.543	4711.63	1478.65
217	19.3851	1008.7	459.631	137.429	4712.06	1483.5
218	19.3621	1005.04	453.428	137.153	4676.9	1477.82
219	19.3016	1021.01	455.37	137.94	4747.46	1487.8
220	19.2529	1036.21	457.349	138.415	4795.16	1497.89
221	19.2122	1046.83	458.019	138.359	4797.29	1504.87
222	18.893	1045.17	457.962	138.51	4761.55	1495.58
223	18.7105	1049.71	459.113	138.592	4760.86	1486.91
224	18.6483	1057.46	459.981	138.547	4768.8	1481.94
225	18.732	1063.01	456.844	138.162	4726.63	1490
226	18.5849	1055.04	450.927	137.102	4682.84	1480.03
227	18.5929	1055.17	449.18	136.721	4675.78	1479.86
228	18.9829	1075.94	456.054	137.851	4733.57	1505.52
229	18.8529	1066.68	448.27	137.046	4682.85	1493.1
230	18.6199	1062.59	444.028	136.411	4653.93	1482.36
231	18.3361	1064.57	443.667	136.054	4650.82	1476.28
232	18.1761	1065.18	442.682	135.912	4651.69	1480
233	18.0022	1062.02	438.34	135.295	4627.25	1473.06
234	17.8467	1061.07	434.826	134.72	4604.05	1464.37
235	17.7585	1070.79	437.714	134.846	4615.43	1464.15
236	18.0482	1081.01	438.304	134.184	4628.52	1470.48
237	17.8132	1096.66	433.208	132.942	4580.66	1469.37
238	17.1294	1114.98	424.995	131.428	4490.58	1470.53
239	16.9457	1100.94	421.229	130.475	4453.06	1446.88
240	16.0204	1110.01	416.111	127.9	4371.06	1438.66
241	15.2202	1131.51	416.834	125.952	4343.42	1446.63
242	15.262	1129.28	415.364	125.275	4325.22	1452.11
243	14.9739	1131.45	416.127	125.879	4326.78	1452.28
244	14.6712	1136.9	417.279	126.516	4338.4	1454.37
245	14.5527	1146.05	417.76	126.395	4357.23	1463.7
246	14.3131	1139.27	412.727	124.546	4303.63	1458.48
247	14.1442	1131.95	410.095	123.419	4267.03	1448.26
248	14.0661	1126.75	410.451	123.192	4255.36	1436.54
249	14.0829	1135.71	411.364	123.076	4255.6	1450.67
250	13.9214	1124.81	405.741	122.393	4189.14	1437.73
251	13.7016	1109.24	399.515	121.694	4114.36	1418.23
252	13.5902	1111.46	402.109	121.872	4122.79	1422.42
253	13.4351	1112.23	402.865	121.137	4118.08	1425.43
254	13.194	1107.78	402.226	120.005	4091.82	1420.29
255	12.8389	1096.04	400.107	118.581	4037.7	1403.41
256	12.9768	1112.85	405.369	119.339	4070.44	1423.54
257	13.1203	1113.74	405.124	118.977	4040.72	1433.48
258	13.21	1102.56	400.984	117.952	3968.92	1432.68
259	12.9958	1095.22	399.679	118.315	3941.86	1418.08
260	12.9046	1095.12	398.769	117.472	3918.46	1419.54
261	12.8199	1091.1	396.425	116.605	3885.46	1420.19
262	12.9582	1045.02	387.744	115.504	3824.62	1419.98
263	14.0735	946.749	378.996	111.838	3843.68	1471.91
264	14.2271	924.864	376.951	111.37	3854.64	1477.15
265	14.858	854.314	366.567	108.458	3829.25	1492.02
266	16.0782	741.011	351.107	104.382	3814.6	1518.29
267	16.3728	745.815	355.662	105.779	3870.06	1533.56
268	16.7206	759.111	362.631	107.325	3938.55	1558.39
269	16.7368	760.469	365.33	107.31	3943.09	1576.55
270	16.7295	752.27	362.59	107.368	3935.89	1565.98
271	16.7459	746.839	363.168	107.903	3961.88	1562.14
272	16.8128	750.313	371.755	109.209	4049.01	1582.4
273	16.8384	743.505	371.4	109.478	4043.83	1585.63
274	16.8954	741.537	373.312	110.499	4067.36	1588.36
275	16.9862	744.638	377.82	112.103	4116.89	1592.27
276	17.1122	750.879	384.16	112.816	4143.56	1603.04
277	17.2309	749.224	384.244	112.847	4131.54	1600.74
278	17.2498	747.226	383.394	112.96	4121.33	1595.44
279	17.0168	753.334	387.237	114.071	4159.97	1597.23
280	17.0705	764.145	393.269	115.59	4207.79	1617.38
281	17.0033	770.346	396.845	116.899	4224.68	1622.12
282	16.7206	769.768	396.963	117.837	4201.02	1603.33
283	16.4218	774.848	404.432	118.045	4224.5	1586.84
284	16.2883	777.741	408.739	118.587	4235.62	1579.59
285	16.2934	780.675	411.092	119.39	4240.82	1576
286	16.4284	790.358	414.114	120.366	4256.4	1561.21
287	16.5605	801.474	420.251	122.188	4285.88	1565.85
288	16.6737	811.132	425.157	123.524	4307.09	1572.26
289	17.3672	788.481	429.921	125.068	4427.62	1573.89
290	18.0509	748.454	433.19	126.987	4574.56	1571.7
291	18.0614	744.623	435.196	127.642	4597.93	1569.98
292	19.0579	701.714	445.235	130.407	4781.1	1569.59
293	19.756	675.644	446.785	130.348	4886.24	1585.92
294	19.6707	671.396	444.333	129.627	4881.16	1584.71
295	19.5204	666.194	441.927	129.24	4870.43	1574.21
296	19.435	666.892	440.744	129.227	4865.59	1565.66
297	19.5005	667.13	439.542	129.044	4877.77	1573
298	19.4874	666.586	440.034	129.326	4894.69	1575.78
299	19.3163	665.051	442.975	130.33	4913.35	1567.25
300	19.4225	671.851	449.084	131.009	4957.42	1585
301	19.402	674.207	450.392	130.605	4948.34	1595.36
302	19.2907	673.631	449.086	129.771	4913.53	1599.01
303	19.2143	675.608	453.406	131.056	4958.4	1597.09
304	19.2094	684.332	455.288	130.982	4955.62	1606.05
305	19.1696	689.932	453.111	129.873	4912.81	1604.74
306	18.9971	683.35	444.006	127.578	4820.46	1572.36
307	19.0179	689.524	448.496	128.978	4859.43	1582.15
308	19.054	692.594	450.423	129.649	4861.16	1589.88
309	19.0737	690.821	447.672	129.056	4803.44	1589.37
310	18.9583	692.775	443.231	128.697	4720.55	1580.18
311	18.5528	699.775	444.964	128.712	4703.86	1578.85
312	18.0879	707.794	448.322	128.744	4712.17	1582.12
313	18.0004	709.215	444.949	128.084	4675.41	1585.88
314	17.7041	707.673	457.35	128.442	4622.81	1578.25
315	17.7159	715.214	494.753	130.412	4595.56	1582.18
316	17.6616	719.986	500.51	130.471	4603.31	1598.54
317	17.9913	717.208	535.529	132.173	4595.14	1614.43
318	18.5151	709.032	587.809	135.066	4651.6	1645
319	18.6299	697.502	603.264	135.803	4696.38	1653.46
320	18.7232	693.439	614.263	136.122	4727.95	1663.71
321	18.655	680.255	620.763	135.719	4717.99	1656.15
322	18.569	666.873	630.422	135.324	4714.39	1649.08
323	18.6083	662.608	652.754	135.71	4770.51	1662.05
324	18.6659	651.138	662.469	135.251	4730.78	1669.42
325	18.6896	638.992	673.449	135.347	4714.08	1673.48
326	18.6695	627.479	688.283	136.265	4743.69	1674.77
327	18.7086	618.989	698.608	136.226	4752.65	1684.84
328	18.6748	606.854	705.529	136.151	4739.57	1685.96
329	18.6088	592	712.002	136.135	4716.57	1682.39
330	18.6057	575.545	725.92	136.479	4711.7	1683.45
331	18.6428	565.224	732.364	135.934	4701.31	1691.8
332	18.6327	552.787	737.884	135.439	4694.49	1694.94
333	18.5134	533.075	745.809	135.528	4697.27	1684.42
334	18.3023	519.135	759.962	135.335	4717.46	1698.74
335	18.1801	507.435	768.858	134.684	4716.52	1707.61
336	18.1309	496.278	772.393	133.706	4693.51	1707.96
337	17.911	473.731	776.462	133.594	4662.39	1692.51
338	17.6825	456.603	780.481	132.628	4639.96	1692.97
339	17.2583	423.148	770.03	128.694	4557.25	1679.25
340	16.0354	319.988	698.451	114.686	4194.7	1574.49
341	15.5974	289.223	679.697	110.649	4098.85	1535.23
342	14.8521	243.928	641.906	103.549	3903.54	1472.54
343	13.1376	152.689	546.138	87.2921	3420.48	1328.79

## Sheet: Profile_HB6_cpx5_Table5
Table 5: Profile along Cpx 5 from January 2015
Profile position (1=core)	Zr (ppm)	Cr (ppm)	V (ppm)	Sc (ppm)	Ti (ppm)	Mn (ppm)
1	19.6007	1118.03	443.523	142.025	4807.74	1668.52
2	19.7095	1119.92	444.692	143.315	4841.93	1663.63
3	19.9397	1117.3	444.139	143.303	4859.09	1662.42
4	20.1831	1119.63	446.5	143.518	4902.94	1663.23
5	20.3651	1127.82	452.34	144.586	4978.15	1664.64
6	20.4466	1123.1	453.013	145.354	5000.24	1665.35
7	20.5516	1132.75	457.626	145.952	5052.79	1675.29
8	20.4948	1142.58	461.095	146.944	5103.54	1680.19
9	20.4145	1146.84	462.629	147.786	5130.65	1679.64
10	20.5165	1142.2	462.568	147.744	5117.76	1676.43
11	20.7387	1145.45	466.144	147.757	5134.29	1676.57
12	20.7959	1145.31	468.59	148.621	5167.53	1665.63
13	20.9362	1140.68	471.199	149.058	5179.16	1662.71
14	21.1601	1133.13	475.213	149.016	5175.69	1671.42
15	21.1545	1128.43	482.566	149.968	5224.38	1678.02
16	21.4533	1117.4	482.649	151.195	5235.28	1666.44
17	21.8197	1110.13	483.34	151.591	5243.8	1656.01
18	22.0583	1105.25	485.578	151.725	5265.03	1646.7
19	22.0353	1099.61	488.409	152.188	5299.59	1635.9
20	22.0334	1085.09	481.016	152.275	5246.54	1615.23
21	22.3455	1081.35	480.898	152.69	5256.27	1621.5
22	22.6062	1080.4	481.649	153.367	5289.77	1622.66
23	22.773	1080.33	480.993	154.037	5314.54	1616.77
24	22.6388	1074.54	474.824	153.403	5244.26	1614.73
25	22.2422	1064.26	470.204	152.47	5196.18	1602.4
26	22.3182	1066.94	471.881	153.062	5220.83	1603.15
27	22.0977	1062.47	467.927	152.885	5193.39	1596.07
28	21.6059	1052.38	457.978	151.778	5122.8	1575.79
29	21.5451	1052.97	456.789	151.389	5123.51	1569.2
30	21.4707	1059.75	457.542	152.065	5127.5	1572.59
31	21.2566	1052.92	456.165	151.629	5118.38	1565.39
32	21.0248	1040.15	453.844	150.36	5099.22	1558.02
33	20.9899	1040.32	453.604	149.452	5077.9	1572.95
34	20.7315	1040.66	455.783	149.923	5086.6	1562.83
35	20.5339	1040.32	452.596	149.678	5051.56	1561.55
36	20.4062	1040.88	447.97	148.829	5007.42	1562.84
37	20.319	1045.19	444.855	147.811	4974.04	1562.2
38	20.1435	1061.03	445.695	147.997	4949.14	1556.55
39	20.0649	1064.26	444.309	147.868	4940.92	1549.43
40	19.9733	1073.03	445.319	147.243	4939.66	1546.09
41	19.7796	1079.18	444.708	146.314	4917.05	1537.22
42	19.437	1071.46	437.595	145.379	4845.41	1513.73
43	19.6318	1083.2	437.983	144.728	4798.01	1530.12
44	19.7259	1092.31	438.212	144.81	4790.82	1532.78
45	19.5168	1095.58	436.671	144.314	4771.86	1527.57
46	19.0919	1094.69	433.571	143.065	4726.02	1519.53
47	18.934	1098.16	431.405	142.141	4673.46	1515.6
48	18.9401	1107.39	433.505	142.602	4667.15	1516.06
49	18.6999	1101.32	430.696	142.424	4620.09	1515.71
50	18.4354	1098.6	428.722	142.101	4573.82	1516.54
51	18.3599	1115.18	432.481	142.26	4570.7	1519.39
52	18.1862	1120.88	430.504	142.805	4574.16	1511.28
53	17.7933	1157.71	426.431	141.08	4463.45	1497.67
54	17.4957	1178.14	424.058	139.911	4379.96	1487.6
55	17.292	1177.13	423.289	139.834	4359.72	1487.05
56	17.0761	1191.63	421.054	138.499	4279.18	1467.21
57	17.1733	1206.21	421.567	138.925	4245.25	1443.6
58	17.2889	1212.31	424.468	139.776	4277.28	1448.45
59	17.3726	1218.03	428.523	140.435	4314.79	1456.93
60	17.4024	1215.46	431.526	140.775	4342.69	1460.96
61	17.3934	1210.08	428.949	139.626	4325.5	1462.95
62	17.3024	1206.5	430.391	139.835	4358.64	1472.03
63	17.333	1199.4	430.616	139.919	4368.63	1482.21
64	17.4748	1191.7	429.919	140.15	4368.59	1492.94
65	17.6367	1189.59	430.54	141.418	4403.17	1505.23
66	17.6977	1188.61	433.274	142.894	4453.25	1509.89
67	17.7248	1172.23	430.419	142.711	4456.22	1506.66
68	17.8774	1162.8	431.154	142.804	4466.26	1510.14
69	18.0998	1163.05	437.275	143.837	4498.3	1520.84
70	17.844	1135.45	436.131	144.179	4492.71	1509.72
71	18.1196	1117.36	434.425	143.315	4487.42	1509.37
72	18.4213	1105.35	435.513	143.572	4511.98	1520.9
73	18.628	1095.13	437.369	144.39	4541.75	1531.26
74	18.7172	1081.77	437.205	144.716	4544.77	1526.37
75	19.2561	1060.92	438.977	145.017	4565.39	1533.14
76	19.6156	1054.93	444.505	146.88	4631.8	1547.57
77	19.7671	1044.8	447.24	147.981	4668.87	1556.05
78	19.8221	1032.1	447.73	148.156	4679.06	1558.87
79	20.1125	1042.67	454.877	149.591	4753.98	1572.13
80	20.1733	1029.13	453.499	150.018	4768.74	1566.7
81	20.2216	999.632	452.965	149.765	4773.85	1570.24
82	20.1967	958.919	455.999	148.936	4817.32	1601.47
83	20.178	953.376	460.748	149.062	4859.96	1623.36
84	20.0536	939.292	459.385	148.853	4871.46	1621.56
85	19.7975	898.92	454.512	147.713	4835.75	1638.72
86	19.65	878.238	451.895	146.82	4798.01	1649.22
87	19.6848	877.873	454.429	146.803	4798.33	1658.61
88	19.643	870.333	453.783	147.254	4796.3	1653.14
89	19.8015	870.818	455.516	148.096	4814.38	1669.27
90	19.9635	874.344	457.689	149.49	4835.74	1671.05
91	20.0559	876.8	458.75	150.628	4864.57	1667
92	20.1003	877.152	458.036	150.86	4893.85	1666.42
93	20.4641	885.186	457.545	149.791	4868.49	1681.22
94	20.5596	885.149	459.542	149.805	4884.42	1678.69
95	20.5862	882.507	458.356	149.307	4859.01	1668.52
96	20.6144	881.483	456.341	148.408	4818.13	1658.47
97	20.6826	886.42	458.746	147.797	4826.43	1656.99
98	20.4085	883.961	460.18	147.674	4839.87	1648.06
99	20.2678	883.94	455.477	146.45	4806.34	1635.97
100	20.2522	884.591	451.561	145.106	4773.85	1632.05
101	20.3047	884.853	450.738	144.254	4759.49	1634.08
102	20.2436	884.452	447.502	144.151	4728.61	1611.47
103	20.2795	889.406	442.205	143.262	4669.61	1608.34
104	20.2826	893.069	441.482	143.226	4666.34	1601.43
105	20.1576	891.707	440.411	143.208	4670.25	1587.01
106	19.8543	884.128	433.17	142.141	4618.47	1566.31
107	19.9105	899.916	434.496	142.635	4623.99	1563.38
108	19.5729	903.71	434.469	142.865	4617.8	1550.93
109	19.3089	903.695	432.321	142.66	4591.31	1538.16
110	18.726	921.183	426.507	140.788	4533.2	1527.81
111	17.9278	964.747	423.7	138.314	4496.3	1533.75
112	17.6444	967.499	423.574	138.189	4501.67	1520.29
113	17.1204	978.216	419.671	136.546	4455.16	1507.94
114	16.1459	1002.77	413.195	132.676	4367.67	1492.78
115	16.0037	1013.65	413.564	131.286	4376.85	1489.59
116	15.9462	1018.27	413.801	131.944	4401.16	1483.37
117	15.9264	1034.15	414.958	131.385	4388.97	1480.73
118	15.9405	1047.91	417.125	131.608	4406.76	1482.79
119	16.0006	1056.07	418.71	132.765	4443.7	1487.03
120	16.131	1059.71	416.61	133.986	4440.67	1487.91
121	16.2584	1068.37	412.505	133.139	4397.49	1488.42
122	16.4449	1072.8	414.098	133.78	4411.67	1489.56
123	16.5177	1068.17	414.882	134.316	4421.28	1484.82
124	16.4794	1057.46	411.935	133.992	4400.88	1475.38
125	16.9633	1071.72	414.543	135.029	4454.26	1490.48
126	17.0815	1068.77	412.73	135.773	4486.06	1494.64
127	17.1461	1065.94	412.433	135.683	4495.79	1496.8
128	17.2069	1068.04	416.146	135.198	4503.53	1501.85
129	17.2443	1076.13	425.146	135.126	4537.08	1513.39
130	17.1652	1058.59	418.566	134.851	4500.62	1490.1
131	17.3974	1063.03	419.44	135.269	4497.67	1493.8
132	17.4648	1068.56	421.561	135.588	4505.9	1497.04
133	17.277	1066.85	421.71	135.566	4509.09	1490.81
134	17.4112	1068.32	420.379	135.837	4492.94	1495.51
135	17.4386	1071.91	422.369	135.959	4504.62	1506.45
136	17.439	1069.51	425.427	136.988	4535.86	1509.81
137	17.3487	1060.35	425.966	137.519	4549.82	1502.19
138	17.1106	1047	421.196	136.168	4514.4	1484.71
139	17.3856	1053.58	424.501	138.201	4541.43	1498.35
140	17.644	1044.61	423.451	138.045	4531.15	1495.55
141	17.7524	1041.91	421.596	138.091	4525.94	1495.88
142	18.0488	1041.23	420.586	138.795	4520.77	1506.7
143	18.0783	1038.98	421.002	140.293	4528.2	1506.79
144	18.0823	1032.54	419.034	139.796	4508.9	1503.39
145	18.1894	1034.92	423.176	139.927	4521.47	1512.42
146	18.2499	1039.58	427.333	140.186	4540.26	1517.86
147	18.1459	1040.65	425.925	140.012	4536.49	1508.02
148	17.9504	1046.54	422.162	139.873	4500.42	1507.95
149	18.0147	1055.21	421.481	139.097	4457.04	1508.16
150	18.0049	1058.69	420.497	138.78	4425.37	1502.77
151	17.9297	1055.56	418.815	138.833	4404.02	1495.33
152	17.9849	1047.69	417.514	138.491	4379.78	1495.73
153	17.6712	1048.83	418.341	138.737	4372.29	1489.59
154	17.3836	1043.2	416.282	137.999	4342.05	1479.42
155	17.2149	1041.29	413.171	136.9	4317.74	1477.59
156	17.1757	1047.7	410.508	136.071	4316.2	1485.96
157	17.0475	1048.96	408.913	136.341	4321.05	1472.73
158	16.8449	1043.1	407.704	135.611	4298.84	1460.58
159	16.7851	1045.59	408.883	135.396	4293.72	1465.38
160	16.7344	1049.12	410.597	135.512	4293.35	1471.77
161	16.4559	1039.48	409.665	135.261	4267.69	1454.39
162	16.5605	1041.59	408.159	134.533	4215	1457.21
163	16.4306	1047.64	408.497	134.457	4205.87	1455.6
164	16.1765	1047	405.815	134.006	4185.51	1445.39
165	15.9545	1038.78	400.386	132.956	4142.3	1431.34
166	16.0991	1038.59	401.753	132.357	4134.27	1436.9
167	16.0184	1045.53	408.928	133.242	4173.45	1444.23
168	15.7942	1046.82	409.719	132.504	4168.16	1440.99
169	15.2483	1053.17	406.601	130.465	4151.66	1442.91
170	14.4976	1065.05	402.722	128.756	4142.85	1457.33
171	14.3513	1063.52	400.58	128.625	4129.79	1449.57
172	13.9191	1060.31	394.67	127.173	4094.85	1444.59
173	13.014	1057.69	387.734	125.307	4049.1	1449.15
174	12.6894	1049.9	385.824	124.044	4010.59	1447
175	12.4221	1047.09	387.766	123.7	4018.45	1446.72
176	12.3824	1037.78	385.585	123.571	4004.1	1438.86
177	12.4752	1034.44	387.484	124.141	4000.63	1445.78
178	12.5798	1034.79	390.829	125.107	4017.85	1456.08
179	12.6034	1034.39	392.631	125.997	4051.44	1458.37
180	12.5988	1021.08	391.487	125.542	4025.46	1451.96
181	12.6211	1018.93	392.322	124.976	4024.7	1451.05
182	12.6725	1014.42	392.979	125.007	4043.68	1447.19
183	12.7149	1003.47	392.097	125.036	4053.7	1439.6
184	12.678	985.623	388.334	123.613	4005.35	1431.2
185	12.7273	989.194	391.594	124.811	4072.73	1445.62
186	12.6472	977.607	389.86	124.611	4074.93	1439.2
187	12.6125	965.246	388.431	124.153	4048.44	1431.94
188	12.6567	959.984	389.766	124.118	4023.58	1434.31
189	12.3652	950.966	387.901	123.833	4013.23	1429.36
190	12.3565	940.054	385.315	123.592	3983.41	1424.04
191	12.4243	932.558	385.135	123.071	3952.09	1419.35
192	12.52	928.589	387.101	122.873	3934.61	1416.79
193	12.6229	926.495	389.648	123.838	3944.81	1417.48
194	12.5816	918.171	383.022	123.545	3904.48	1401.01
195	12.6338	923.771	385.378	123.885	3918.42	1411.65
196	12.7201	925.245	387.987	124.158	3930.91	1419.83
197	12.7709	916.518	388.325	124.169	3924.47	1416.88
198	12.7165	890.737	389.522	122.767	3947.91	1416.86
199	12.7991	873.33	385.878	121.317	3976.45	1412.33
200	12.9384	872.897	386.359	121.796	3994.09	1416.41
201	13.0985	863.447	383.142	120.95	4022.42	1416.74
202	13.0535	843.826	374.982	119.131	4043.47	1406.11
203	13.1299	843.343	373.982	118.864	4032.98	1418.8
204	13.2579	839.678	374.09	118.669	4051.17	1415.19
205	13.2169	833.017	373.992	118.618	4052.13	1408.82
206	13.054	825.527	373.701	118.721	4036.75	1406.1
207	13.0828	822.265	374.426	118.943	4048.47	1410.3
208	13.0843	821.759	375.411	119.238	4046.12	1405.37
209	13.0664	817.373	374.703	119.129	4028.64	1407.36
210	13.0286	814.215	374.186	119.106	4025.71	1412.86
211	12.9741	814.871	374.693	119.507	4055.92	1415.7
212	12.924	804.777	370.055	119.635	4076.88	1399.19
213	12.9789	794.223	371.262	119.833	4084.98	1395.96
214	12.9082	786.341	372.668	120.097	4103.54	1391.54
215	12.7728	781.55	372.158	120.33	4117.34	1387.79
216	12.7921	778.962	368.707	120.362	4088.63	1394.71
217	12.8565	782.377	371.747	120.997	4098.16	1405.7
218	12.9409	777.535	373.118	121.779	4113.17	1407.19
219	13.0451	769.258	373.27	122.729	4131.39	1409.03
220	13.1342	762.806	373.377	123.65	4152.05	1417.77
221	13.048	766.861	377.046	123.56	4178.18	1433.43
222	13.0624	756.106	375.458	123.36	4167.91	1419.76
223	13.1795	751.159	376.02	123.138	4166.1	1426.55
224	13.3242	749.621	377.748	123.024	4104.38	1442.25
225	13.3963	742.923	377.439	123.15	3893.55	1439.23
226	13.5093	726.422	375.952	122.883	3897.02	1442.8
227	13.4282	708.726	381.509	122.521	3929.1	1472.5
228	13.3803	700.21	384.722	122.451	3942.15	1486.06
229	13.3891	692.407	383.697	122.413	3936.12	1476.33
230	13.2303	673.957	385.053	121.225	3935.51	1491.11
231	13.0608	666.202	392.115	121.841	3963.58	1514.55
232	12.9367	654.8	393.613	122.485	3986.09	1512.59
233	12.8277	640.773	392.504	122.344	3997.77	1507.45
234	12.9007	634.935	390.094	121.508	3984.56	1507.99
235	13.0228	631.201	389.198	121.622	3994.44	1504.22
236	13.0665	624.913	385.708	121.792	3984.16	1492.08
237	13.0733	623.742	385.379	121.727	3976.93	1489.91
238	13.0447	625.275	388.181	121.614	3979.3	1496.3
239	12.9486	617.342	389.145	122.132	3986.97	1492.35
240	13.2256	613.34	387.145	122.127	3983	1497.22
241	13.3927	611.14	387.273	122.48	4014.85	1501.19
242	13.4165	607.78	387.546	122.866	4044.46	1497.94
243	13.3191	601.041	385.853	122.946	4039.45	1486.49
244	13.2471	591.444	380.54	122.519	4007.22	1491.05
245	13.3719	589.188	381.302	122.119	4016.85	1490.35
246	13.5138	580.554	380.381	122.131	4016.76	1478.2
247	13.6517	570.717	379.608	122.774	4018.53	1470.93
248	13.8286	574.75	385.561	124.227	4064.83	1499.22
249	13.9201	572.959	388.054	125.338	4087.3	1499.02
250	13.9169	564.23	385.972	124.67	4060.98	1495.05
251	13.8948	557.414	384.4	123.955	4034.95	1492.71
252	13.9087	555.912	385.985	124.252	4035.92	1493.25
253	13.9827	549.698	388.001	125.297	4041.5	1487.42
254	14.0551	542.786	390.012	125.124	4052.84	1487.69
255	14.1686	526.662	405.607	125.923	4122.77	1506.28
256	14.3516	491.527	437.64	128.202	4221.86	1543.16
257	14.573	481.712	446.699	129.17	4226.95	1554.78
258	14.7423	474.357	462.351	129.595	4272.82	1584.34
259	14.8322	435.496	499.551	131.63	4351.3	1616.37
260	14.9146	416.13	518.371	132.365	4393.56	1635.68
261	15.0887	412.815	527.14	132.157	4417.67	1651.75
262	15.0098	410.688	536.547	131.937	4421.46	1653.44
263	14.7562	397.51	537.159	131.414	4392.72	1648.77
264	14.7004	390.822	545.942	131.501	4406.89	1660.18
265	14.7661	387.862	557.246	131.932	4444.51	1673.43
266	14.811	383.47	563.596	132.164	4471.01	1672.17
267	14.6418	375.297	569.061	130.425	4428.67	1667.54
268	14.658	372.413	578.293	129.744	4455.84	1681.64
269	14.5925	368.149	586.48	129.543	4477.1	1690.85
270	14.4493	362.636	593.166	129.494	4473.22	1694.53
271	14.4514	361.506	601.166	129.309	4460.79	1710.09
272	14.3879	360.912	612.776	129.794	4508.27	1721.18
273	14.2224	354.723	613.104	129.064	4486.78	1712.3
274	14.1029	347.617	614.341	128.158	4444.13	1705.54
275	14.1255	343.632	625.545	127.993	4428.47	1716.05
276	14.1411	342.577	637.78	128.533	4462.79	1722.39
277	14.0868	335.626	640.552	127.786	4455.87	1720.57
278	14.136	329.716	643.598	126.679	4432.99	1719.97
279	14.1904	324.743	648.542	125.859	4411.13	1720.18
280	14.0126	317.606	653.972	126.01	4408.37	1716.63
281	13.8985	311.908	655.545	125.315	4369.11	1720.5
282	13.7978	309.245	662.517	124.974	4384.87	1729.22
283	13.6648	304.235	668.431	124.41	4399.79	1732.71
284	15.3049	265.905	636.574	116.217	4270.03	1651.54
285	17.5816	227.199	590.119	106.433	4090.06	1556.18
286	17.6055	225.089	592.091	105.888	4096.53	1566.54
287	18.9726	201.454	566.343	100.285	4032.95	1518.4
288	21.5276	158.401	509.863	89.8994	3903.93	1412.59
289	21.5232	151.658	494.79	88.0853	3834.61	1398.06
290	21.4712	154.587	498.325	88.7447	3861.37	1416.29
291	21.304	154.808	491.913	88.9491	3852.31	1419.93
292	21.2075	155.39	485.812	89.0186	3848.28	1427.05
293	21.2721	157.245	484.889	89.1467	3865.34	1444.27
294	21.5116	158.804	489.44	89.4647	3894.63	1466.25
295	21.4598	159.093	482.08	89.4911	3874.92	1469.19
296	21.4999	161.263	481.596	89.716	3898.64	1499.04
297	21.4648	162.43	484.441	90.0524	3938.99	1530.53
298	21.176	159.881	484.595	90.2859	3957.12	1535.98
299	20.9098	158.704	478.052	89.6447	3936.05	1543.54
300	20.8348	160.608	478.223	90.016	3949.7	1572.77
301	20.6163	161.959	478.95	91.0052	3962.6	1597.17
302	20.1123	161.717	477.271	91.8533	3944.68	1609.92
303	19.2657	160.344	471.288	91.1775	3856.62	1616.04
304	18.0202	159.781	472.895	90.8835	3786.76	1628.8
305	16.0462	160.341	470.564	90.8055	3700.66	1637.19
306	14.2113	161.946	470.23	90.9773	3634.5	1653.66
307	13.1657	164.07	475.296	91.3386	3611.26	1681.99
308	12.6593	164.14	475.562	91.3691	3593.83	1683.32
309	12.1197	160.603	471.075	90.9086	3573.82	1691.49
310	12.0886	156.665	474.035	91.151	3598.85	1728.71
311	12.4345	153.221	481.109	91.8175	3647.86	1777.96
312	12.708	150.464	481.826	91.9599	3666.31	1801.93
